# Supplementary material for: Current and Future Niche of North and Central American Sand Flies (Diptera: Psychodidae) in Climate Change Scenarios
Source: PubMed Central journal article supplement (PMC3777871; doi:10.1371/journal.pntd.0002421), 2013-09-19
Supplement: pntd.0002421.s029.pdf [file pntd.0002421.s029.pdf]

Table S3. Proportion of conserved sand fly species' ENM (overlap) and overall geographic projection change between present and 2050, in both CC scenarios (%).

| Categories             | Species                   | Overlap A2               | Overlap B2 | ENM change in A2 (%) | ENM change in B2 (%) |
|------------------------|---------------------------|--------------------------|------------|----------------------|----------------------|
| Tropical               | <i>Brumptomyia hamata</i> | 84.33                    | 98.02      | 12.91                | 31.18                |
|                        | <i>Br. mesai</i>          | 94.33                    | 99.39      | 25.89                | 32.06                |
|                        | <i>Lutzomyia beltrani</i> | 97.94                    | 99.74      | 24.88                | 28.96                |
|                        | <i>Lu. bispinosa</i>      | 92.10                    | 99.29      | 76.68                | 81.01                |
|                        | <i>Lu. carpenteri</i>     | 95.07                    | 99.44      | 26.19                | 32.29                |
|                        | <i>Lu. cayennensis</i>    | 97.10                    | 99.46      | 25.75                | 28.60                |
|                        | <i>Lu. chiapanensis</i>   | 97.71                    | 99.54      | 18.80                | 23.39                |
|                        | <i>Lu. cratifer</i>       | 87.86                    | 99.07      | 14.05                | 27.61                |
|                        | <i>Lu. cruciata</i>       | 97.16                    | 97.86      | 71.13                | 62.49                |
|                        | <i>Lu. deleoni</i>        | 88.13                    | 88.13      | 0.00                 | 26.57                |
|                        | <i>Lu. dodgei</i>         | 88.41                    | 98.38      | 14.95                | 26.27                |
|                        | <i>Lu. longipalpis</i>    | 95.91                    | 99.31      | 16.61                | 19.37                |
|                        | <i>Lu. olmeca olmeca</i>  | 90.87                    | 99.70      | 15.33                | 28.02                |
|                        | <i>Lu. ovallesi</i>       | 96.72                    | 99.75      | 28.95                | 33.28                |
|                        | <i>Lu. panamensis</i>     | 98.38                    | 99.78      | 31.35                | 35.18                |
|                        | <i>Lu. permira</i>        | 97.02                    | 99.33      | 21.23                | 26.25                |
|                        | <i>Lu. serrana</i>        | 92.60                    | 99.10      | 17.69                | 27.41                |
|                        | <i>Lu. shannoni</i>       | 94.91                    | 96.45      | 17.11                | 13.84                |
|                        | <i>Lu. steatopyga</i>     | 92.03                    | 99.40      | 17.86                | 29.26                |
|                        | Temperate                 | <i>Lu. trinidadensis</i> | 85.14      | 98.13                | 10.91                |
| <i>Lu. undulata</i>    |                           | 96.06                    | 99.45      | 21.70                | 26.77                |
| <i>Lu. ylephiletor</i> |                           | 97.76                    | 99.38      | 50.01                | 41.40                |
| <i>Lu. anthophora</i>  |                           | 90.46                    | 91.49      | 32.66                | 26.21                |
| Broad-range            | <i>Lu. californica</i>    | 97.26                    | 99.24      | 27.54                | 40.17                |
|                        | <i>Lu. diabolica</i>      | 99.38                    | 99.56      | 58.95                | 54.70                |
|                        | <i>Lu. stewarti</i>       | 95.47                    | 98.30      | 23.13                | 35.39                |
|                        | <i>Lu. texana</i>         | 99.51                    | 99.88      | 71.76                | 65.00                |
|                        | <i>Lu. vexator</i>        | 68.73                    | 72.99      | -15.79               | -14.78               |
