# Supplementary material for: Current and Future Niche of North and Central American Sand Flies (Diptera: Psychodidae) in Climate Change Scenarios
Source: PLoS Negl Trop Dis. 2013 Sep 19;7(9):e2421. doi: 10.1371/journal.pntd.0002421 (PMC3777871; doi:10.1371/journal.pntd.0002421)
Supplement: Table S1 — Reference points for sand fly collection records used in ENM modeling of NCA species. (PDF) [file pntd.0002421.s027.pdf]

Table S1. Reference points for sand fly collection records used in ENM modeling of NCA species

| Genus              | Species            | Community        | Longitude      | Latitude      | State        | Country | References |
|--------------------|--------------------|------------------|----------------|---------------|--------------|---------|------------|
| <i>Lutzomyia</i>   | <i>longipalpis</i> | Agua Zarca       | -99.3619444444 | 18.2363888889 | Guerrero     | MEXICO  | 20         |
| <i>Lutzomyia</i>   | <i>shannoni</i>    | Aguada La Muñeca | -90.8381250000 | 18.5999710000 | Campeche     | MEXICO  | 5          |
| <i>Lutzomyia</i>   | <i>panamensis</i>  | Aguada La Muñeca | -90.8381250000 | 18.5999710000 | Campeche     | MEXICO  | 4          |
| <i>Lutzomyia</i>   | <i>cruciata</i>    | Aguada La Muñeca | -90.8381250000 | 18.5999710000 | Campeche     | MEXICO  | 4          |
| <i>Lutzomyia</i>   | <i>carpenteri</i>  | Altos de Sevilla | -88.6671014670 | 18.8409818897 | Quintana Roo | MEXICO  | 58         |
| <i>Lutzomyia</i>   | <i>deleoni</i>     | Altos de Sevilla | -88.6671014670 | 18.8409818897 | Quintana Roo | MEXICO  | 58         |
| <i>Brumptomyia</i> | <i>mesai</i>       | Altos de Sevilla | -88.6671014670 | 18.8409818897 | Quintana Roo | MEXICO  | 58         |
| <i>Lutzomyia</i>   | <i>olmeca</i>      | Altos de Sevilla | -88.6671014670 | 18.8409818897 | Quintana Roo | MEXICO  | 58         |
| <i>Lutzomyia</i>   | <i>panamensis</i>  | Altos de Sevilla | -88.6671014670 | 18.8409818897 | Quintana Roo | MEXICO  | 58         |
| <i>Lutzomyia</i>   | <i>shannoni</i>    | Altos de Sevilla | -88.6671014670 | 18.8409818897 | Quintana Roo | MEXICO  | 58         |

|                    |                    |                      |                 |               |              |        |          |
|--------------------|--------------------|----------------------|-----------------|---------------|--------------|--------|----------|
| <i>Lutzomyia</i>   | <i>steatopyga</i>  | Altos de Sevilla     | -88.6671014670  | 18.8409818897 | Quintana Roo | MEXICO | 58       |
| <i>Lutzomyia</i>   | <i>ovallesi</i>    | Altos de Sevilla     | -88.6671014670  | 18.8409818897 | Quintana Roo | MEXICO | 58       |
| <i>Lutzomyia</i>   | <i>deleoni</i>     | Altos de Sevilla     | -88.6681130443  | 18.8377203097 | Quintana Roo | MEXICO | 58       |
| <i>Brumptomyia</i> | <i>mesai</i>       | Altos de Sevilla     | -88.6681130443  | 18.8377203097 | Quintana Roo | MEXICO | 58       |
| <i>Lutzomyia</i>   | <i>panamensis</i>  | Altos de Sevilla     | -88.6681130443  | 18.8377203097 | Quintana Roo | MEXICO | 58       |
| <i>Lutzomyia</i>   | <i>steatopyga</i>  | Altos de Sevilla     | -88.6681130443  | 18.8377203097 | Quintana Roo | MEXICO | 58       |
| <i>Lutzomyia</i>   | <i>olmeca</i>      | Altos de Sevilla     | -88.6681130443  | 18.8377203097 | Quintana Roo | MEXICO | 58       |
| <i>Lutzomyia</i>   | <i>shannoni</i>    | Altos de Sevilla     | -88.6681130443  | 18.8377203097 | Quintana Roo | MEXICO | 58       |
| <i>Lutzomyia</i>   | <i>cruciata</i>    | Altos de Sevilla     | -88.6671014670  | 18.8409818897 | Quintana Roo | MEXICO | 58       |
| <i>Lutzomyia</i>   | <i>cruciata</i>    | Altos de Sevilla     | -88.6681130443  | 18.8377203097 | Quintana Roo | MEXICO | 58       |
| <i>Lutzomyia</i>   | <i>vexator</i>     | Alturas              | -120.5538972222 | 41.4870805556 | California   | USA    | 8, 31    |
| <i>Lutzomyia</i>   | <i>cruciata</i>    | Anastasia State Park | -81.2823250000  | 29.8778583333 | Florida      | USA    | 104, 105 |
| <i>Lutzomyia</i>   | <i>cayennensis</i> | Andres Quintana Roo  | -86.9066666667  | 21.1322222222 | Quintana Roo | MEXICO | 18       |

|                  |                      |                     |                 |               |                              |        |          |
|------------------|----------------------|---------------------|-----------------|---------------|------------------------------|--------|----------|
| <i>Lutzomyia</i> | <i>deleoni</i>       | Andres Quintana Roo | -86.9066666667  | 21.1322222222 | Quintana Roo                 | MEXICO | 18       |
| <i>Lutzomyia</i> | <i>shannoni</i>      | Andres Quintana Roo | -86.9066666667  | 21.1322222222 | Quintana Roo                 | MEXICO | 18       |
| <i>Lutzomyia</i> | <i>trinidadensis</i> | Andres Quintana Roo | -86.9066666667  | 21.1322222222 | Quintana Roo                 | MEXICO | 18       |
| <i>Lutzomyia</i> | <i>olmeca</i>        | Andres Quintana Roo | -86.9066666667  | 21.1322222222 | Quintana Roo                 | MEXICO | 18       |
| <i>Lutzomyia</i> | <i>panamensis</i>    | Andres Quintana Roo | -86.9066666667  | 21.1322222222 | Quintana Roo                 | MEXICO | 18       |
| <i>Lutzomyia</i> | <i>cruciata</i>      | Andres Quintana Roo | -86.9066666667  | 21.1322222222 | Quintana Roo                 | MEXICO | 18       |
| <i>Lutzomyia</i> | <i>shannoni</i>      | Annie Pond          | -87.6773027778  | 34.7998111111 | Alabama                      | USA    | 88       |
| <i>Lutzomyia</i> | <i>vexator</i>       | Ansley              | -92.6929277778  | 32.3956694444 | Louisiana                    | USA    | 42       |
| <i>Lutzomyia</i> | <i>shannoni</i>      | Ansley              | -92.6929277778  | 32.3956694444 | Louisiana                    | USA    | 87       |
| <i>Lutzomyia</i> | <i>chiapanensis</i>  | Apazapan            | -96.7600361111  | 19.3323972222 | Veracruz Ignacio de la Llave | MEXICO | 51       |
| <i>Lutzomyia</i> | <i>longipalpis</i>   | Apazapan            | -96.7600361111  | 19.3323972222 | Veracruz Ignacio de la Llave | MEXICO | 51       |
| <i>Lutzomyia</i> | <i>texana</i>        | Arkansas            | -96.9641000000  | 28.0763361111 | Texas                        | USA    | 104, 105 |
| <i>Lutzomyia</i> | <i>anthophora</i>    | Arivaca Creek       | -111.3317000000 | 31.5744472222 | Arizona                      | USA    | 60, 63   |

|                    |                     |                  |                 |               |                              |        |     |
|--------------------|---------------------|------------------|-----------------|---------------|------------------------------|--------|-----|
| <i>Lutzomyia</i>   | <i>californica</i>  | Arivaca Creek    | -111.3317000000 | 31.5744472222 | Arizona                      | USA    | 60  |
| <i>Lutzomyia</i>   | <i>chiapanensis</i> | Arroyo Agrio     | -96.4308330000  | 19.7055560000 | Veracruz Ignacio de la Llave | MEXICO | 51  |
| <i>Lutzomyia</i>   | <i>texana</i>       | Arroyo Agrio     | -96.4308330000  | 19.7055560000 | Veracruz Ignacio de la Llave | MEXICO | 51  |
| <i>Lutzomyia</i>   | <i>cruciata</i>     | Arroyo Agrio     | -96.4308330000  | 19.7055560000 | Veracruz Ignacio de la Llave | MEXICO | 51  |
| <i>Lutzomyia</i>   | <i>panamensis</i>   | Arroyo Expangale | -92.9533250000  | 17.5505250000 | Tabasco                      | MEXICO | 40  |
| <i>Lutzomyia</i>   | <i>cruciata</i>     | Arroyo Expangale | -92.9533250000  | 17.5505250000 | Tabasco                      | MEXICO | 105 |
| <i>Brumptomyia</i> | <i>mesai</i>        | Arroyo Negro     | -89.2472220000  | 17.8597220000 | Campeche                     | MEXICO | 75  |
| <i>Lutzomyia</i>   | <i>carpenteri</i>   | Arroyo Negro     | -89.2472220000  | 17.8597220000 | Campeche                     | MEXICO | 75  |
| <i>Lutzomyia</i>   | <i>deleoni</i>      | Arroyo Negro     | -89.2472220000  | 17.8597220000 | Campeche                     | MEXICO | 75  |
| <i>Lutzomyia</i>   | <i>longipalpis</i>  | Arroyo Negro     | -89.2472220000  | 17.8597220000 | Campeche                     | MEXICO | 75  |
| <i>Lutzomyia</i>   | <i>olmeca</i>       | Arroyo Negro     | -89.2472220000  | 17.8597220000 | Campeche                     | MEXICO | 75  |
| <i>Lutzomyia</i>   | <i>panamensis</i>   | Arroyo Negro     | -89.2472220000  | 17.8597220000 | Campeche                     | MEXICO | 75  |
| <i>Lutzomyia</i>   | <i>shannoni</i>     | Arroyo Negro     | -89.2472220000  | 17.8597220000 | Campeche                     | MEXICO | 75  |

|                    |                      |                                     |                |               |                  |        |                  |
|--------------------|----------------------|-------------------------------------|----------------|---------------|------------------|--------|------------------|
| <i>Lutzomyia</i>   | <i>cruciata</i>      | Arroyo Negro                        | -89.2472220000 | 17.8597220000 | Campeche         | MEXICO | 75               |
| <i>Lutzomyia</i>   | <i>cruciata</i>      | Asunción Lachixonase                | -95.8250000000 | 16.0952700000 | Oaxaca           | MEXICO | 38               |
| <i>Lutzomyia</i>   | <i>shannoni</i>      | Asuncion Lachixonase<br>(Rio Hondo) | -95.8250000000 | 16.4286111111 | Oaxaca           | MEXICO | 38               |
| <i>Lutzomyia</i>   | <i>ylephiletor</i>   | Augustine                           | -88.9833333333 | 16.9666666667 | Distrito el Cayo | BELIZE | 53, 101          |
| <i>Lutzomyia</i>   | <i>trinidadensis</i> | Augustine                           | -88.9833333333 | 16.9666666667 | Distrito el Cayo | BELIZE | 53, 99, 100, 101 |
| <i>Lutzomyia</i>   | <i>shannoni</i>      | Augustine                           | -88.9833333333 | 16.9666666667 | Distrito el Cayo | BELIZE | 53, 101          |
| <i>Lutzomyia</i>   | <i>steatopyga</i>    | Augustine                           | -88.9833333333 | 16.9666666667 | Distrito el Cayo | BELIZE | 99, 100          |
| <i>Lutzomyia</i>   | <i>beltrani</i>      | Augustine                           | -88.9833333333 | 16.9666666667 | Distrito el Cayo | BELIZE | 98               |
| <i>Lutzomyia</i>   | <i>deleoni</i>       | Augustine                           | -88.9833333333 | 16.9666666667 | Distrito el Cayo | BELIZE | 101, 102         |
| <i>Lutzomyia</i>   | <i>olmeca</i>        | Augustine                           | -88.9833333333 | 16.9666666667 | Distrito el Cayo | BELIZE | 101, 102         |
| <i>Lutzomyia</i>   | <i>panamensis</i>    | Augustine                           | -88.9833333333 | 16.9666666667 | Distrito el Cayo | BELIZE | 101, 102         |
| <i>Lutzomyia</i>   | <i>permira</i>       | Augustine                           | -88.9833333333 | 16.9666666667 | Distrito el Cayo | BELIZE | 101, 102         |
| <i>Brumptomyia</i> | <i>mesai</i>         | Augustine                           | -88.9833333333 | 16.9666666667 | Distrito el Cayo | BELIZE | 57, 99           |

|                    |                      |                   |                 |               |                  |        |          |
|--------------------|----------------------|-------------------|-----------------|---------------|------------------|--------|----------|
| <i>Brumptomyia</i> | <i>hamata</i>        | Augustine         | -88.9833333333  | 16.9666666667 | Distrito el Cayo | BELIZE | 57, 99   |
| <i>Lutzomyia</i>   | <i>cayennensis</i>   | Augustine         | -88.9833333333  | 16.9666666667 | Distrito el Cayo | BELIZE | 57, 99   |
| <i>Lutzomyia</i>   | <i>cruciata</i>      | Augustine         | -88.9833333333  | 16.9666666667 | Distrito el Cayo | BELIZE | 101, 102 |
| <i>Lutzomyia</i>   | <i>diabolica</i>     | Austin            | -97.7430611111  | 30.2665333333 | Texas            | USA    | 104, 105 |
| <i>Lutzomyia</i>   | <i>texana</i>        | Autlan de Navarro | -104.3660722222 | 19.7670972222 | Jalisco          | MEXICO | 38       |
| <i>Lutzomyia</i>   | <i>californica</i>   | Bakersfield       | -119.0184722222 | 35.3710972222 | California       | USA    | 8        |
| <i>Lutzomyia</i>   | <i>stewarti</i>      | Bakersfield       | -119.0184722222 | 35.3710972222 | California       | USA    | 8        |
| <i>Lutzomyia</i>   | <i>vexator</i>       | Bakersfield       | -119.0184722222 | 35.3710972222 | California       | USA    | 8        |
| <i>Lutzomyia</i>   | <i>shannoni</i>      | Baking Pot        | -89.0194444000  | 17.2030556000 | Distrito el Cayo | BELIZE | 99, 100  |
| <i>Brumptomyia</i> | <i>mesai</i>         | Baking Pot        | -89.0194444000  | 17.2030556000 | Distrito el Cayo | BELIZE | 57, 99   |
| <i>Lutzomyia</i>   | <i>permira</i>       | Baking Pot        | -89.0194444000  | 17.2030556000 | Distrito el Cayo | BELIZE | 57, 99   |
| <i>Lutzomyia</i>   | <i>cayennensis</i>   | Baking Pot        | -89.0194444000  | 17.2030556000 | Distrito el Cayo | BELIZE | 57, 99   |
| <i>Lutzomyia</i>   | <i>trinidadensis</i> | Baking Pot        | -89.0194444000  | 17.2030556000 | Distrito el Cayo | BELIZE | 57, 99   |

|                    |                   |                 |                 |               |                  |        |          |
|--------------------|-------------------|-----------------|-----------------|---------------|------------------|--------|----------|
| <i>Lutzomyia</i>   | <i>deleoni</i>    | Baking Pot      | -89.0194444000  | 17.2030556000 | Distrito el Cayo | BELIZE | 57, 99   |
| <i>Lutzomyia</i>   | <i>olmeca</i>     | Baking Pot      | -89.0194444000  | 17.2030556000 | Distrito el Cayo | BELIZE | 57, 99   |
| <i>Lutzomyia</i>   | <i>ovallesi</i>   | Baking Pot      | -89.0194444000  | 17.2030556000 | Distrito el Cayo | BELIZE | 57, 99   |
| <i>Lutzomyia</i>   | <i>carpenteri</i> | Baking Pot      | -89.0194444000  | 17.2030556000 | Distrito el Cayo | BELIZE | 99, 100  |
| <i>Lutzomyia</i>   | <i>cruciata</i>   | Baking Pot      | -89.0194444000  | 17.2030556000 | Distrito el Cayo | BELIZE | 57, 99   |
| <i>Lutzomyia</i>   | <i>diabolica</i>  | Barksdale       | -100.0339611111 | 29.7251333333 | Texas            | USA    | 104, 105 |
| <i>Lutzomyia</i>   | <i>texana</i>     | Barksdale       | -100.0339611111 | 29.7251333333 | Texas            | USA    | 104, 105 |
| <i>Lutzomyia</i>   | <i>shannoni</i>   | Baton Rouge     | -91.1403194444  | 30.4577694444 | Louisiana        | USA    | 34       |
| <i>Lutzomyia</i>   | <i>vexator</i>    | Baton Rouge     | -91.1403194444  | 30.4577694444 | Louisiana        | USA    | 34       |
| <i>Lutzomyia</i>   | <i>shannoni</i>   | Bay Saint Louis | -89.3333222222  | 30.3053250000 | Mississippi      | USA    | 105      |
| <i>Lutzomyia</i>   | <i>shannoni</i>   | Belmopan        | -88.7679444444  | 17.2514166667 | Distrito Belice  | BELIZE | 57, 99   |
| <i>Lutzomyia</i>   | <i>cruciata</i>   | Belmopan        | -88.7679444444  | 20.0000000000 | Distrito Belice  | BELIZE | 57, 99   |
| <i>Brumptomyia</i> | <i>hamata</i>     | Bencanche       | -89.2169444444  | 19.8741666667 | Yucatan          | MEXICO | 64, 84   |

|                    |                      |                |                |               |                  |        |        |
|--------------------|----------------------|----------------|----------------|---------------|------------------|--------|--------|
| <i>Lutzomyia</i>   | <i>carpenteri</i>    | Bencanche      | -89.2169444444 | 19.8741666667 | Yucatan          | MEXICO | 64, 84 |
| <i>Lutzomyia</i>   | <i>deleoni</i>       | Bencanche      | -89.2169444444 | 19.8741666667 | Yucatan          | MEXICO | 64, 84 |
| <i>Lutzomyia</i>   | <i>olmeca</i>        | Bencanche      | -89.2169444444 | 19.8741666667 | Yucatan          | MEXICO | 64, 84 |
| <i>Lutzomyia</i>   | <i>shannoni</i>      | Bencanche      | -89.2169444444 | 19.8741666667 | Yucatan          | MEXICO | 64, 84 |
| <i>Brumptomyia</i> | <i>mesai</i>         | Bencanche      | -89.2169444444 | 19.8741666667 | Yucatan          | MEXICO | 64, 84 |
| <i>Lutzomyia</i>   | <i>cruciata</i>      | Bencanche      | -89.2169444444 | 19.8741666667 | Yucatan          | MEXICO | 64, 84 |
| <i>Lutzomyia</i>   | <i>trinidadensis</i> | Big Falls      | -88.5833333000 | 17.4833333000 | Distrito el Cayo | BELIZE | 57, 99 |
| <i>Lutzomyia</i>   | <i>olmeca</i>        | Big Falls      | -88.5833333000 | 17.4833333000 | Distrito el Cayo | BELIZE | 57, 99 |
| <i>Lutzomyia</i>   | <i>shannoni</i>      | Big Falls      | -88.5833333000 | 17.4833333000 | Distrito el Cayo | BELIZE | 57, 99 |
| <i>Lutzomyia</i>   | <i>cruciata</i>      | Big Falls      | -88.5833333000 | 17.4833333000 | Distrito el Cayo | BELIZE | 57, 99 |
| <i>Lutzomyia</i>   | <i>californica</i>   | Big Pine Key   | -80.8700000000 | 25.4350000000 | Florida          | USA    | 8      |
| <i>Lutzomyia</i>   | <i>shannoni</i>      | Billy's Island | -82.3404027778 | 30.8050694444 | Georgia          | USA    | 105    |
| <i>Lutzomyia</i>   | <i>cruciata</i>      | Billy's Island | -82.3404027778 | 30.8050694444 | Georgia          | USA    | 105    |

|                    |                      |                          |                 |               |                 |        |            |
|--------------------|----------------------|--------------------------|-----------------|---------------|-----------------|--------|------------|
| <i>Lutzomyia</i>   | <i>trinidadensis</i> | Blue Creek (San Antonio) | -89.0430194444  | 19.1954805556 | Distrito Toledo | BELIZE | 55         |
| <i>Brumptomyia</i> | <i>mesai</i>         | Blue Creek (San Antonio) | -89.0430194444  | 19.1954805556 | Distrito Toledo | BELIZE | 46         |
| <i>Lutzomyia</i>   | <i>ovallesi</i>      | Blue Creek (San Antonio) | -89.0430194444  | 19.1954805556 | Distrito Toledo | BELIZE | 46         |
| <i>Lutzomyia</i>   | <i>serrana</i>       | Blue Creek (San Antonio) | -89.0430194444  | 19.1954805556 | Distrito Toledo | BELIZE | 46         |
| <i>Lutzomyia</i>   | <i>deleoni</i>       | Blue Creek (San Antonio) | -89.0430194444  | 19.1954805556 | Distrito Toledo | BELIZE | 46         |
| <i>Lutzomyia</i>   | <i>shannoni</i>      | Blue Creek (San Antonio) | -89.0430194444  | 19.1954805556 | Distrito Toledo | BELIZE | 45, 46, 57 |
| <i>Lutzomyia</i>   | <i>carpenteri</i>    | Blue Creek (San Antonio) | -89.0430194444  | 19.1954805556 | Distrito Toledo | BELIZE | 46         |
| <i>Lutzomyia</i>   | <i>olmeca</i>        | Blue Creek (San Antonio) | -89.0430194444  | 19.1954805556 | Distrito Toledo | BELIZE | 46         |
| <i>Lutzomyia</i>   | <i>ylephiletor</i>   | Blue Creek (San Antonio) | -89.0430194444  | 19.1954805556 | Distrito Toledo | BELIZE | 46         |
| <i>Lutzomyia</i>   | <i>bispinosa</i>     | Blue Creek (San Antonio) | -89.0430194444  | 19.1954805556 | Distrito Toledo | BELIZE | 46         |
| <i>Lutzomyia</i>   | <i>cayennensis</i>   | Blue Creek (San Antonio) | -89.0430194444  | 19.1954805556 | Distrito Toledo | BELIZE | 46         |
| <i>Lutzomyia</i>   | <i>cruciata</i>      | Blue Creek (San Antonio) | -89.0430194444  | 19.1954805556 | Distrito Toledo | BELIZE | 45, 46, 57 |
| <i>Lutzomyia</i>   | <i>diabolica</i>     | Brackettville            | -100.4178555556 | 29.3104861111 | Texas           | USA    | 26         |

|                  |                      |                 |                 |               |                              |        |              |
|------------------|----------------------|-----------------|-----------------|---------------|------------------------------|--------|--------------|
| <i>Lutzomyia</i> | <i>texana</i>        | Brackettville   | -100.4178555556 | 29.3104861111 | Texas                        | USA    | 26           |
| <i>Lutzomyia</i> | <i>anthophora</i>    | Brackettville   | -100.4178555556 | 29.3104861111 | Texas                        | USA    | 26           |
| <i>Lutzomyia</i> | <i>trinidadensis</i> | Branch Mouth    | -89.0800000000  | 17.1802778000 | Distrito el Cayo             | BELIZE | 53           |
| <i>Lutzomyia</i> | <i>permira</i>       | Branch Mouth    | -89.0800000000  | 17.1802778000 | Distrito el Cayo             | BELIZE | 53           |
| <i>Lutzomyia</i> | <i>shannoni</i>      | Branch Mouth    | -89.0800000000  | 17.1802778000 | Distrito el Cayo             | BELIZE | 53           |
| <i>Lutzomyia</i> | <i>cayennensis</i>   | Branch Mouth    | -89.0800000000  | 17.1802778000 | Distrito el Cayo             | BELIZE | 53, 57, 99   |
| <i>Lutzomyia</i> | <i>anthophora</i>    | Brooks Air Base | -98.4426638889  | 29.3411805556 | Texas                        | USA    | 59, 78       |
| <i>Lutzomyia</i> | <i>anthophora</i>    | Brownsville     | -97.4974833333  | 25.9016083333 | Texas                        | USA    | 27, 104, 105 |
| <i>Lutzomyia</i> | <i>shannoni</i>      | Brownsville     | -82.3878722222  | 28.5527222222 | Florida                      | USA    | 104, 105     |
| <i>Lutzomyia</i> | <i>texana</i>        | Brownsville     | -97.4974833333  | 25.9016083333 | Texas                        | USA    | 25, 104, 105 |
| <i>Lutzomyia</i> | <i>cruciata</i>      | Brownsville     | -97.4974833333  | 25.9016083333 | Texas                        | USA    | 26           |
| <i>Lutzomyia</i> | <i>shannoni</i>      | Buenavista      | -94.9313888889  | 18.2300000000 | Veracruz Ignacio de la Llave | MEXICO | 51           |
| <i>Lutzomyia</i> | <i>shannoni</i>      | Buenavista      | -94.3583333333  | 17.7980555555 | Veracruz Ignacio de la Llave | MEXICO | 51           |

|                  |                    |                                       |                 |               |                              |        |         |
|------------------|--------------------|---------------------------------------|-----------------|---------------|------------------------------|--------|---------|
| <i>Lutzomyia</i> | <i>cruciata</i>    | Buenavista                            | -94.8466666667  | 17.5413888880 | Veracruz Ignacio de la Llave | MEXICO | 38      |
| <i>Lutzomyia</i> | <i>dodgei</i>      | Buenavista                            | -99.4076166667  | 18.4589194444 | Guerrero                     | MEXICO | 46      |
| <i>Lutzomyia</i> | <i>anthophora</i>  | Buenos Aires National Wildlife Refuge | -111.5421916667 | 31.4886055556 | Arizona                      | USA    | 63      |
| <i>Lutzomyia</i> | <i>panamensis</i>  | Bullet Tre Falls                      | -89.1127778000  | 17.1722222000 | Distrito el Cayo             | BELIZE | 57, 99  |
| <i>Lutzomyia</i> | <i>olmeca</i>      | Bullet Tre Falls                      | -89.1127778000  | 17.1722222000 | Distrito el Cayo             | BELIZE | 57, 99  |
| <i>Lutzomyia</i> | <i>shannoni</i>    | Bullet Tre Falls                      | -89.1127778000  | 17.1722222000 | Distrito el Cayo             | BELIZE | 57, 99  |
| <i>Lutzomyia</i> | <i>carpenteri</i>  | Bullet Tre Falls                      | -89.1127778000  | 17.1722222000 | Distrito el Cayo             | BELIZE | 99, 100 |
| <i>Lutzomyia</i> | <i>cruciata</i>    | Bullet Tre Falls                      | -89.1127778000  | 17.1722222000 | Distrito el Cayo             | BELIZE | 57, 99  |
| <i>Lutzomyia</i> | <i>californica</i> | Buttonwillow                          | -119.4695611111 | 35.4004694444 | California                   | USA    | 8       |
| <i>Lutzomyia</i> | <i>stewarti</i>    | Byron                                 | -121.6380222222 | 37.8671361111 | California                   | USA    | 8       |
| <i>Lutzomyia</i> | <i>vexator</i>     | Byron                                 | -121.6380222222 | 37.8671361111 | California                   | USA    | 8       |
| <i>Lutzomyia</i> | <i>cruciata</i>    | Cabañas                               | -92.2450000000  | 15.3641666667 | Chiapas                      | MEXICO | 43      |
| <i>Lutzomyia</i> | <i>cayennensis</i> | Cafetal Ojo de Agua                   | -105.1416666667 | 21.9519027778 | Nayarit                      | MEXICO | 38      |

|                  |                    |                       |                 |               |                              |           |            |
|------------------|--------------------|-----------------------|-----------------|---------------|------------------------------|-----------|------------|
| <i>Lutzomyia</i> | <i>californica</i> | Cahuilla Hills        | -116.4164000000 | 33.6887222222 | California                   | USA       | 105        |
| <i>Lutzomyia</i> | <i>stewarti</i>    | Calaveras Creek       | -121.8477527778 | 37.5205250000 | California                   | USA       | 8, 56      |
| <i>Lutzomyia</i> | <i>diabolica</i>   | Calderas de Cofrados  | -104.7147200000 | 21.6230600000 | Nayarit                      | MEXICO    | 40         |
| <i>Lutzomyia</i> | <i>shannoni</i>    | Calderas de Cofrados  | -104.7147200000 | 21.6230600000 | Nayarit                      | MEXICO    | 40         |
| <i>Lutzomyia</i> | <i>cruciata</i>    | Calderas de Cofrados  | -104.7147200000 | 21.6230600000 | Nayarit                      | MEXICO    | 40         |
| <i>Lutzomyia</i> | <i>stewarti</i>    | Caliente Creek        | -118.8339861111 | 35.2796944444 | California                   | USA       | 8          |
| <i>Lutzomyia</i> | <i>cruciata</i>    | Camalote              | -96.6852777778  | 15.9777777778 | Oaxaca                       | MEXICO    | 38         |
| <i>Lutzomyia</i> | <i>diabolica</i>   | Camp Bullis           | -98.5501277778  | 29.6747027778 | Texas                        | USA       | 104, 105   |
| <i>Lutzomyia</i> | <i>cruciata</i>    | Campestre Las Bajadas | -96.1944444444  | 19.1505555556 | Veracruz Ignacio de la Llave | MEXICO    | 38         |
| <i>Lutzomyia</i> | <i>deleoni</i>     | Canchacan             | -89.4188888889  | 16.2733333333 | Peten                        | GUATEMALA | 45, 46, 57 |
| <i>Lutzomyia</i> | <i>shannoni</i>    | Caney Lake            | -93.6090388889  | 30.7157000000 | Louisiana                    | USA       | 87         |
| <i>Lutzomyia</i> | <i>diabolica</i>   | Canyon Lake           | -98.2622722222  | 29.8753222222 | Texas                        | USA       | 104, 105   |
| <i>Lutzomyia</i> | <i>diabolica</i>   | Cañada del Zapote     | -97.1272222222  | 18.2352777778 | Puebla                       | MEXICO    | 38         |

|                  |                   |                    |                 |               |                       |        |    |
|------------------|-------------------|--------------------|-----------------|---------------|-----------------------|--------|----|
| <i>Lutzomyia</i> | <i>diabolica</i>  | Cañon de los Lobos | -99.1166944443  | 18.8764722216 | Morelos               | MEXICO | 32 |
| <i>Lutzomyia</i> | <i>stewarti</i>   | Cañon Guadalupe    | -115.4453416667 | 32.6455583333 | Baja California Norte | MEXICO | 48 |
| <i>Lutzomyia</i> | <i>deleoni</i>    | Caobas             | -89.1104835807  | 18.3843231325 | Quintana Roo          | MEXICO | 58 |
| <i>Lutzomyia</i> | <i>olmeca</i>     | Caobas             | -89.1104835807  | 18.3843231325 | Quintana Roo          | MEXICO | 58 |
| <i>Lutzomyia</i> | <i>ovallesi</i>   | Caobas             | -89.1104835807  | 18.3843231325 | Quintana Roo          | MEXICO | 58 |
| <i>Lutzomyia</i> | <i>panamensis</i> | Caobas             | -89.1104835807  | 18.3843231325 | Quintana Roo          | MEXICO | 58 |
| <i>Lutzomyia</i> | <i>shannoni</i>   | Caobas             | -89.1104835807  | 18.3843231325 | Quintana Roo          | MEXICO | 58 |
| <i>Lutzomyia</i> | <i>steatopyga</i> | Caobas             | -89.1104835807  | 18.3843231325 | Quintana Roo          | MEXICO | 58 |
| <i>Lutzomyia</i> | <i>ovallesi</i>   | Caobas             | -89.1116224669  | 18.3846085913 | Quintana Roo          | MEXICO | 58 |
| <i>Lutzomyia</i> | <i>steatopyga</i> | Caobas             | -89.1116224669  | 18.3846085913 | Quintana Roo          | MEXICO | 58 |
| <i>Lutzomyia</i> | <i>deleoni</i>    | Caobas             | -89.1116224669  | 18.3846085913 | Quintana Roo          | MEXICO | 58 |
| <i>Lutzomyia</i> | <i>olmeca</i>     | Caobas             | -89.1116224669  | 18.3846085913 | Quintana Roo          | MEXICO | 58 |
| <i>Lutzomyia</i> | <i>shannoni</i>   | Caobas             | -89.1116224669  | 18.3846085913 | Quintana Roo          | MEXICO | 58 |

|                  |                      |                      |                 |               |                     |        |        |
|------------------|----------------------|----------------------|-----------------|---------------|---------------------|--------|--------|
| <i>Lutzomyia</i> | <i>cruciata</i>      | Caobas               | -89.1104835807  | 18.3843231325 | Quintana Roo        | MEXICO | 58     |
| <i>Lutzomyia</i> | <i>cruciata</i>      | Caobas               | -89.1116224669  | 18.3846085913 | Quintana Roo        | MEXICO | 58     |
| <i>Lutzomyia</i> | <i>stewarti</i>      | Capay                | -122.0828388889 | 39.7937611111 | California          | USA    | 8      |
| <i>Lutzomyia</i> | <i>vexator</i>       | Capay                | -122.0828388889 | 39.7937611111 | California          | USA    | 8      |
| <i>Lutzomyia</i> | <i>californica</i>   | Capay                | -122.0828388889 | 39.7937611111 | California          | USA    | 8      |
| <i>Lutzomyia</i> | <i>cruciata</i>      | Caracoles Estrella   | -96.4283333333  | 17.9469444444 | Oaxaca              | MEXICO | 40     |
| <i>Lutzomyia</i> | <i>longipalpis</i>   | Caracuaro de Morelos | -101.1203861111 | 19.0163666667 | Michoacan de Ocampo | MEXICO | 43     |
| <i>Lutzomyia</i> | <i>olmeca</i>        | Cardenas             | -93.3763888889  | 18.0001111111 | Tabasco             | MEXICO | 40     |
| <i>Lutzomyia</i> | <i>texana</i>        | Cascada El Salto     | -99.3301388882  | 22.5223999933 | San Luis Potosi     | MEXICO | 105    |
| <i>Lutzomyia</i> | <i>panamensis</i>    | Caves Branch         | -88.7000000000  | 17.1333333000 | Distrito el Cayo    | BELIZE | 57, 99 |
| <i>Lutzomyia</i> | <i>trinidadensis</i> | Caves Branch         | -88.7000000000  | 17.1333333000 | Distrito el Cayo    | BELIZE | 57, 99 |
| <i>Lutzomyia</i> | <i>shannoni</i>      | Caves Branch         | -88.7000000000  | 17.1333333000 | Distrito el Cayo    | BELIZE | 57, 99 |
| <i>Lutzomyia</i> | <i>ovallesi</i>      | Caves Branch         | -88.7000000000  | 17.1333333000 | Distrito el Cayo    | BELIZE | 57, 99 |

|                    |                      |                |                 |               |                     |        |         |
|--------------------|----------------------|----------------|-----------------|---------------|---------------------|--------|---------|
| <i>Lutzomyia</i>   | <i>cruciata</i>      | Caves Branch   | -88.7000000000  | 17.1333333000 | Distrito el Cayo    | BELIZE | 57, 99  |
| <i>Lutzomyia</i>   | <i>anthophora</i>    | Cenobio Moreno | -102.5041666667 | 19.0955555556 | Michoacan de Ocampo | MEXICO | 38      |
| <i>Lutzomyia</i>   | <i>cayennensis</i>   | Cenobio Moreno | -102.5041666667 | 19.0955555556 | Michoacan de Ocampo | MEXICO | 38      |
| <i>Lutzomyia</i>   | <i>cruciata</i>      | Cenote Azul    | -87.3022200000  | 20.4877800000 | Quintana Roo        | MEXICO | 105     |
| <i>Lutzomyia</i>   | <i>permira</i>       | Central Farm   | -89.0000000000  | 17.3186555556 | Distrito el Cayo    | BELIZE | 99, 100 |
| <i>Lutzomyia</i>   | <i>olmeca</i>        | Central Farm   | -89.0000000000  | 17.3186555556 | Distrito el Cayo    | BELIZE | 99, 100 |
| <i>Brumptomyia</i> | <i>mesai</i>         | Central Farm   | -89.0000000000  | 17.3186555556 | Distrito el Cayo    | BELIZE | 57      |
| <i>Brumptomyia</i> | <i>hamata</i>        | Central Farm   | -89.0000000000  | 17.3186555556 | Distrito el Cayo    | BELIZE | 57      |
| <i>Lutzomyia</i>   | <i>panamensis</i>    | Central Farm   | -89.0000000000  | 17.3186555556 | Distrito el Cayo    | BELIZE | 57      |
| <i>Lutzomyia</i>   | <i>cayennensis</i>   | Central Farm   | -89.0000000000  | 17.3186555556 | Distrito el Cayo    | BELIZE | 57      |
| <i>Lutzomyia</i>   | <i>trinidadensis</i> | Central Farm   | -89.0000000000  | 17.3186555556 | Distrito el Cayo    | BELIZE | 57      |
| <i>Lutzomyia</i>   | <i>beltrani</i>      | Central Farm   | -89.0000000000  | 17.3186555556 | Distrito el Cayo    | BELIZE | 57      |
| <i>Lutzomyia</i>   | <i>deleoni</i>       | Central Farm   | -89.0000000000  | 17.3186555556 | Distrito el Cayo    | BELIZE | 57      |

|                    |                      |                  |                |               |                  |        |         |
|--------------------|----------------------|------------------|----------------|---------------|------------------|--------|---------|
| <i>Lutzomyia</i>   | <i>shannoni</i>      | Central Farm     | -89.0000000000 | 17.3186555556 | Distrito el Cayo | BELIZE | 57      |
| <i>Lutzomyia</i>   | <i>ovallesi</i>      | Central Farm     | -89.0000000000 | 17.3186555556 | Distrito el Cayo | BELIZE | 57      |
| <i>Lutzomyia</i>   | <i>carpenteri</i>    | Central Farm     | -89.0000000000 | 17.3186555556 | Distrito el Cayo | BELIZE | 99, 100 |
| <i>Lutzomyia</i>   | <i>cruciata</i>      | Central Farm     | -89.0000000000 | 17.3186555556 | Distrito el Cayo | BELIZE | 99, 100 |
| <i>Lutzomyia</i>   | <i>carpenteri</i>    | Central Vallarta | -87.0661297625 | 20.8638944689 | Quintana Roo     | MEXICO | 58      |
| <i>Lutzomyia</i>   | <i>cayennensis</i>   | Central Vallarta | -87.0661297625 | 20.8638944689 | Quintana Roo     | MEXICO | 58      |
| <i>Lutzomyia</i>   | <i>deleoni</i>       | Central Vallarta | -87.0661297625 | 20.8638944689 | Quintana Roo     | MEXICO | 58      |
| <i>Lutzomyia</i>   | <i>olmeca</i>        | Central Vallarta | -87.0661297625 | 20.8638944689 | Quintana Roo     | MEXICO | 58      |
| <i>Lutzomyia</i>   | <i>shannoni</i>      | Central Vallarta | -87.0661297625 | 20.8638944689 | Quintana Roo     | MEXICO | 58      |
| <i>Lutzomyia</i>   | <i>steatopyga</i>    | Central Vallarta | -87.0661297625 | 20.8638944689 | Quintana Roo     | MEXICO | 58      |
| <i>Lutzomyia</i>   | <i>trinidadensis</i> | Central Vallarta | -87.0661297625 | 20.8638944689 | Quintana Roo     | MEXICO | 58      |
| <i>Brumptomyia</i> | <i>mesai</i>         | Central Vallarta | -87.0661297625 | 20.8638944689 | Quintana Roo     | MEXICO | 58      |
| <i>Lutzomyia</i>   | <i>undulata</i>      | Central Vallarta | -87.0661297625 | 20.8638944689 | Quintana Roo     | MEXICO | 58      |

|                    |                    |                                    |                |               |                              |        |    |
|--------------------|--------------------|------------------------------------|----------------|---------------|------------------------------|--------|----|
| <i>Brumptomyia</i> | <i>mesai</i>       | Central Vallarta                   | -87.0783913080 | 20.8727985729 | Quintana Roo                 | MEXICO | 58 |
| <i>Lutzomyia</i>   | <i>steatopyga</i>  | Central Vallarta                   | -87.0783913080 | 20.8727985729 | Quintana Roo                 | MEXICO | 58 |
| <i>Lutzomyia</i>   | <i>undulata</i>    | Central Vallarta                   | -87.0783913080 | 20.8727985729 | Quintana Roo                 | MEXICO | 58 |
| <i>Lutzomyia</i>   | <i>carpenteri</i>  | Central Vallarta                   | -87.0783913080 | 20.8727985729 | Quintana Roo                 | MEXICO | 58 |
| <i>Lutzomyia</i>   | <i>cayennensis</i> | Central Vallarta                   | -87.0783913080 | 20.8727985729 | Quintana Roo                 | MEXICO | 58 |
| <i>Lutzomyia</i>   | <i>olmeca</i>      | Central Vallarta                   | -87.0783913080 | 20.8727985729 | Quintana Roo                 | MEXICO | 58 |
| <i>Lutzomyia</i>   | <i>shannoni</i>    | Central Vallarta                   | -87.0783913080 | 20.8727985729 | Quintana Roo                 | MEXICO | 58 |
| <i>Lutzomyia</i>   | <i>cruciata</i>    | Central Vallarta                   | -87.0783913080 | 20.8727985729 | Quintana Roo                 | MEXICO | 58 |
| <i>Lutzomyia</i>   | <i>diabolica</i>   | Chaparral Wildlife Management Area | -99.8124944444 | 28.4116500000 | Texas                        | USA    | 59 |
| <i>Brumptomyia</i> | <i>mesai</i>       | Chavarillo                         | -96.7913890000 | 19.4252780000 | Veracruz Ignacio de la Llave | MEXICO | 51 |
| <i>Lutzomyia</i>   | <i>longipalpis</i> | Chavarillo                         | -96.7913890000 | 19.4252780000 | Veracruz Ignacio de la Llave | MEXICO | 51 |
| <i>Lutzomyia</i>   | <i>texana</i>      | Chavarillo                         | -96.7913890000 | 19.4252780000 | Veracruz Ignacio de la Llave | MEXICO | 51 |
| <i>Lutzomyia</i>   | <i>cruciata</i>    | Chavarillo                         | -96.7913890000 | 19.4252780000 | Veracruz Ignacio de la Llave | MEXICO | 51 |

|                    |                   |                          |                |               |              |        |        |
|--------------------|-------------------|--------------------------|----------------|---------------|--------------|--------|--------|
| <i>Lutzomyia</i>   | <i>shannoni</i>   | Chemin-A-Haut State Park | -91.8491888889 | 32.9083861111 | Louisiana    | USA    | 87     |
| <i>Lutzomyia</i>   | <i>cruciata</i>   | Chetumal                 | -88.3034500000 | 18.5025861111 | Quintana Roo | MEXICO | 43     |
| <i>Brumptomyia</i> | <i>mesai</i>      | Chetumal - N1            | -88.3278888889 | 18.5340305556 | Quintana Roo | MEXICO | 89, 90 |
| <i>Lutzomyia</i>   | <i>deleoni</i>    | Chetumal - N1            | -88.3278888889 | 18.5340305556 | Quintana Roo | MEXICO | 89, 90 |
| <i>Lutzomyia</i>   | <i>olmeca</i>     | Chetumal - N1            | -88.3278888889 | 18.5340305556 | Quintana Roo | MEXICO | 89, 90 |
| <i>Lutzomyia</i>   | <i>shannoni</i>   | Chetumal - N1            | -88.3278888889 | 18.5340305556 | Quintana Roo | MEXICO | 89, 90 |
| <i>Lutzomyia</i>   | <i>cruciata</i>   | Chetumal - N1            | -88.3278888889 | 18.5340305556 | Quintana Roo | MEXICO | 89, 90 |
| <i>Lutzomyia</i>   | <i>deleoni</i>    | Chetumal - N10           | -88.2983138856 | 18.5462638856 | Quintana Roo | MEXICO | 89, 90 |
| <i>Brumptomyia</i> | <i>mesai</i>      | Chetumal - N10           | -88.2983138856 | 18.5462638856 | Quintana Roo | MEXICO | 89, 90 |
| <i>Lutzomyia</i>   | <i>olmeca</i>     | Chetumal - N10           | -88.2983138856 | 18.5462638856 | Quintana Roo | MEXICO | 89, 90 |
| <i>Lutzomyia</i>   | <i>shannoni</i>   | Chetumal - N10           | -88.2983138856 | 18.5462638856 | Quintana Roo | MEXICO | 89, 90 |
| <i>Lutzomyia</i>   | <i>steatopyga</i> | Chetumal - N10           | -88.2983138856 | 18.5462638856 | Quintana Roo | MEXICO | 89, 90 |
| <i>Lutzomyia</i>   | <i>cruciata</i>   | Chetumal - N10           | -88.2983138856 | 18.5462638856 | Quintana Roo | MEXICO | 89, 90 |

|                    |                   |                |                |               |              |        |        |
|--------------------|-------------------|----------------|----------------|---------------|--------------|--------|--------|
| <i>Lutzomyia</i>   | <i>deleoni</i>    | Chetumal - N11 | -88.2556277778 | 18.5933333327 | Quintana Roo | MEXICO | 89, 90 |
| <i>Brumptomyia</i> | <i>mesai</i>      | Chetumal - N11 | -88.2556277778 | 18.5933333327 | Quintana Roo | MEXICO | 89, 90 |
| <i>Lutzomyia</i>   | <i>steatopyga</i> | Chetumal - N11 | -88.2556277778 | 18.5933333327 | Quintana Roo | MEXICO | 89, 90 |
| <i>Lutzomyia</i>   | <i>olmeca</i>     | Chetumal - N11 | -88.2556277778 | 18.5933333327 | Quintana Roo | MEXICO | 89, 90 |
| <i>Lutzomyia</i>   | <i>shannoni</i>   | Chetumal - N11 | -88.2556277778 | 18.5933333327 | Quintana Roo | MEXICO | 89, 90 |
| <i>Lutzomyia</i>   | <i>cruciata</i>   | Chetumal - N11 | -88.2556277778 | 18.5933333327 | Quintana Roo | MEXICO | 89, 90 |
| <i>Brumptomyia</i> | <i>mesai</i>      | Chetumal - N12 | -88.3889577778 | 18.5448250000 | Quintana Roo | MEXICO | 89, 90 |
| <i>Lutzomyia</i>   | <i>olmeca</i>     | Chetumal - N12 | -88.3889577778 | 18.5448250000 | Quintana Roo | MEXICO | 89, 90 |
| <i>Lutzomyia</i>   | <i>shannoni</i>   | Chetumal - N12 | -88.3889577778 | 18.5448250000 | Quintana Roo | MEXICO | 89, 90 |
| <i>Lutzomyia</i>   | <i>carpenteri</i> | Chetumal - N12 | -88.3889577778 | 18.5448250000 | Quintana Roo | MEXICO | 89, 90 |
| <i>Lutzomyia</i>   | <i>deleoni</i>    | Chetumal - N12 | -88.3889577778 | 18.5448250000 | Quintana Roo | MEXICO | 89, 90 |
| <i>Brumptomyia</i> | <i>hamata</i>     | Chetumal - N12 | -88.3889577778 | 18.5448250000 | Quintana Roo | MEXICO | 89, 90 |
| <i>Lutzomyia</i>   | <i>cruciata</i>   | Chetumal - N12 | -88.3889577778 | 18.5448250000 | Quintana Roo | MEXICO | 89, 90 |

|                    |                 |               |                |               |              |        |        |
|--------------------|-----------------|---------------|----------------|---------------|--------------|--------|--------|
| <i>Brumptomyia</i> | <i>mesai</i>    | Chetumal - N2 | -88.3227888889 | 18.5464416667 | Quintana Roo | MEXICO | 89, 90 |
| <i>Lutzomyia</i>   | <i>ovallesi</i> | Chetumal - N2 | -88.3227888889 | 18.5464416667 | Quintana Roo | MEXICO | 89, 90 |
| <i>Lutzomyia</i>   | <i>deleoni</i>  | Chetumal - N2 | -88.3227888889 | 18.5464416667 | Quintana Roo | MEXICO | 89, 90 |
| <i>Lutzomyia</i>   | <i>olmeca</i>   | Chetumal - N2 | -88.3227888889 | 18.5464416667 | Quintana Roo | MEXICO | 89, 90 |
| <i>Lutzomyia</i>   | <i>shannoni</i> | Chetumal - N2 | -88.3227888889 | 18.5464416667 | Quintana Roo | MEXICO | 89, 90 |
| <i>Lutzomyia</i>   | <i>cruciata</i> | Chetumal - N2 | -88.3227888889 | 18.5464416667 | Quintana Roo | MEXICO | 89, 90 |
| <i>Brumptomyia</i> | <i>mesai</i>    | Chetumal - N3 | -88.3237888889 | 18.5477500000 | Quintana Roo | MEXICO | 89, 90 |
| <i>Lutzomyia</i>   | <i>ovallesi</i> | Chetumal - N3 | -88.3237888889 | 18.5477500000 | Quintana Roo | MEXICO | 89, 90 |
| <i>Lutzomyia</i>   | <i>deleoni</i>  | Chetumal - N3 | -88.3237888889 | 18.5477500000 | Quintana Roo | MEXICO | 89, 90 |
| <i>Lutzomyia</i>   | <i>olmeca</i>   | Chetumal - N3 | -88.3237888889 | 18.5477500000 | Quintana Roo | MEXICO | 89, 90 |
| <i>Lutzomyia</i>   | <i>shannoni</i> | Chetumal - N3 | -88.3237888889 | 18.5477500000 | Quintana Roo | MEXICO | 89, 90 |
| <i>Lutzomyia</i>   | <i>cruciata</i> | Chetumal - N3 | -88.3237888889 | 18.5477500000 | Quintana Roo | MEXICO | 89, 90 |
| <i>Brumptomyia</i> | <i>mesai</i>    | Chetumal - N4 | -88.3160583333 | 18.5647777778 | Quintana Roo | MEXICO | 89, 90 |

|                    |                   |               |                |               |              |        |        |
|--------------------|-------------------|---------------|----------------|---------------|--------------|--------|--------|
| <i>Lutzomyia</i>   | <i>carpenteri</i> | Chetumal - N4 | -88.3160583333 | 18.5647777778 | Quintana Roo | MEXICO | 89, 90 |
| <i>Lutzomyia</i>   | <i>ovallesi</i>   | Chetumal - N4 | -88.3160583333 | 18.5647777778 | Quintana Roo | MEXICO | 89, 90 |
| <i>Lutzomyia</i>   | <i>deleoni</i>    | Chetumal - N4 | -88.3160583333 | 18.5647777778 | Quintana Roo | MEXICO | 89, 90 |
| <i>Lutzomyia</i>   | <i>olmeca</i>     | Chetumal - N4 | -88.3160583333 | 18.5647777778 | Quintana Roo | MEXICO | 89, 90 |
| <i>Lutzomyia</i>   | <i>shannoni</i>   | Chetumal - N4 | -88.3160583333 | 18.5647777778 | Quintana Roo | MEXICO | 89, 90 |
| <i>Lutzomyia</i>   | <i>cruciata</i>   | Chetumal - N4 | -88.3160583333 | 18.5647777778 | Quintana Roo | MEXICO | 89, 90 |
| <i>Brumptomyia</i> | <i>mesai</i>      | Chetumal - N5 | -88.3215805556 | 18.5400555556 | Quintana Roo | MEXICO | 89, 90 |
| <i>Lutzomyia</i>   | <i>ovallesi</i>   | Chetumal - N5 | -88.3215805556 | 18.5400555556 | Quintana Roo | MEXICO | 89, 90 |
| <i>Lutzomyia</i>   | <i>deleoni</i>    | Chetumal - N5 | -88.3215805556 | 18.5400555556 | Quintana Roo | MEXICO | 89, 90 |
| <i>Lutzomyia</i>   | <i>olmeca</i>     | Chetumal - N5 | -88.3215805556 | 18.5400555556 | Quintana Roo | MEXICO | 89, 90 |
| <i>Lutzomyia</i>   | <i>shannoni</i>   | Chetumal - N5 | -88.3215805556 | 18.5400555556 | Quintana Roo | MEXICO | 89, 90 |
| <i>Lutzomyia</i>   | <i>cruciata</i>   | Chetumal - N5 | -88.3215805556 | 18.5400555556 | Quintana Roo | MEXICO | 89, 90 |
| <i>Brumptomyia</i> | <i>mesai</i>      | Chetumal - N6 | -88.3967361111 | 18.5696777778 | Quintana Roo | MEXICO | 89, 90 |

|                    |                 |               |                |               |              |        |        |
|--------------------|-----------------|---------------|----------------|---------------|--------------|--------|--------|
| <i>Lutzomyia</i>   | <i>ovallesi</i> | Chetumal - N6 | -88.3967361111 | 18.5696777778 | Quintana Roo | MEXICO | 89, 90 |
| <i>Lutzomyia</i>   | <i>deleoni</i>  | Chetumal - N6 | -88.3967361111 | 18.5696777778 | Quintana Roo | MEXICO | 89, 90 |
| <i>Lutzomyia</i>   | <i>olmeca</i>   | Chetumal - N6 | -88.3967361111 | 18.5696777778 | Quintana Roo | MEXICO | 89, 90 |
| <i>Lutzomyia</i>   | <i>shannoni</i> | Chetumal - N6 | -88.3967361111 | 18.5696777778 | Quintana Roo | MEXICO | 89, 90 |
| <i>Lutzomyia</i>   | <i>cruciata</i> | Chetumal - N6 | -88.3967361111 | 18.5696777778 | Quintana Roo | MEXICO | 89, 90 |
| <i>Lutzomyia</i>   | <i>deleoni</i>  | Chetumal - N7 | -88.3216972222 | 18.5479750000 | Quintana Roo | MEXICO | 89, 90 |
| <i>Lutzomyia</i>   | <i>olmeca</i>   | Chetumal - N7 | -88.3216972222 | 18.5479750000 | Quintana Roo | MEXICO | 89, 90 |
| <i>Lutzomyia</i>   | <i>shannoni</i> | Chetumal - N7 | -88.3216972222 | 18.5479750000 | Quintana Roo | MEXICO | 89, 90 |
| <i>Lutzomyia</i>   | <i>cruciata</i> | Chetumal - N7 | -88.3216972222 | 18.5479750000 | Quintana Roo | MEXICO | 89, 90 |
| <i>Lutzomyia</i>   | <i>deleoni</i>  | Chetumal - N8 | -88.2675416667 | 18.5356055222 | Quintana Roo | MEXICO | 89, 90 |
| <i>Lutzomyia</i>   | <i>ovallesi</i> | Chetumal - N8 | -88.2675416667 | 18.5356055222 | Quintana Roo | MEXICO | 89, 90 |
| <i>Lutzomyia</i>   | <i>cruciata</i> | Chetumal - N8 | -88.2675416667 | 18.5356055222 | Quintana Roo | MEXICO | 89, 90 |
| <i>Brumptomyia</i> | <i>mesai</i>    | Chetumal - N9 | -88.2686332660 | 18.5742333267 | Quintana Roo | MEXICO | 89, 90 |

|                    |                    |               |                |               |              |        |        |
|--------------------|--------------------|---------------|----------------|---------------|--------------|--------|--------|
| <i>Lutzomyia</i>   | <i>shannoni</i>    | Chetumal - N9 | -88.2686332660 | 18.5742333267 | Quintana Roo | MEXICO | 89, 90 |
| <i>Lutzomyia</i>   | <i>deleoni</i>     | Chetumal - N9 | -88.2686332660 | 18.5742333267 | Quintana Roo | MEXICO | 89, 90 |
| <i>Lutzomyia</i>   | <i>olmeca</i>      | Chetumal - N9 | -88.2686332660 | 18.5742333267 | Quintana Roo | MEXICO | 89, 90 |
| <i>Lutzomyia</i>   | <i>cruciata</i>    | Chetumal - N9 | -88.2686332660 | 18.5742333267 | Quintana Roo | MEXICO | 89, 90 |
| <i>Brumptomyia</i> | <i>mesai</i>       | Chetumal - S1 | -88.3228888889 | 18.5064861111 | Quintana Roo | MEXICO | 89, 90 |
| <i>Lutzomyia</i>   | <i>ovallesi</i>    | Chetumal - S1 | -88.3228888889 | 18.5064861111 | Quintana Roo | MEXICO | 89, 90 |
| <i>Lutzomyia</i>   | <i>deleoni</i>     | Chetumal - S1 | -88.3228888889 | 18.5064861111 | Quintana Roo | MEXICO | 89, 90 |
| <i>Lutzomyia</i>   | <i>olmeca</i>      | Chetumal - S1 | -88.3228888889 | 18.5064861111 | Quintana Roo | MEXICO | 89, 90 |
| <i>Lutzomyia</i>   | <i>shannoni</i>    | Chetumal - S1 | -88.3228888889 | 18.5064861111 | Quintana Roo | MEXICO | 89, 90 |
| <i>Lutzomyia</i>   | <i>cruciata</i>    | Chetumal - S1 | -88.3228888889 | 18.5064861111 | Quintana Roo | MEXICO | 89, 90 |
| <i>Brumptomyia</i> | <i>mesai</i>       | Chetumal - S2 | -88.3227888889 | 18.5071388889 | Quintana Roo | MEXICO | 89, 90 |
| <i>Lutzomyia</i>   | <i>cayennensis</i> | Chetumal - S2 | -88.3227888889 | 18.5071388889 | Quintana Roo | MEXICO | 89, 90 |
| <i>Lutzomyia</i>   | <i>deleoni</i>     | Chetumal - S2 | -88.3227888889 | 18.5071388889 | Quintana Roo | MEXICO | 89, 90 |

|                    |                    |               |                |               |              |        |        |
|--------------------|--------------------|---------------|----------------|---------------|--------------|--------|--------|
| <i>Lutzomyia</i>   | <i>longipalpis</i> | Chetumal - S2 | -88.3227888889 | 18.5071388889 | Quintana Roo | MEXICO | 89, 90 |
| <i>Lutzomyia</i>   | <i>olmeca</i>      | Chetumal - S2 | -88.3227888889 | 18.5071388889 | Quintana Roo | MEXICO | 89, 90 |
| <i>Lutzomyia</i>   | <i>permira</i>     | Chetumal - S2 | -88.3227888889 | 18.5071388889 | Quintana Roo | MEXICO | 89, 90 |
| <i>Lutzomyia</i>   | <i>shannoni</i>    | Chetumal - S2 | -88.3227888889 | 18.5071388889 | Quintana Roo | MEXICO | 89, 90 |
| <i>Lutzomyia</i>   | <i>cruciata</i>    | Chetumal - S2 | -88.3227888889 | 18.5071388889 | Quintana Roo | MEXICO | 89, 90 |
| <i>Brumptomyia</i> | <i>mesai</i>       | Chetumal - S3 | -88.3227888889 | 18.5120527778 | Quintana Roo | MEXICO | 89, 90 |
| <i>Lutzomyia</i>   | <i>ovallesi</i>    | Chetumal - S3 | -88.3227888889 | 18.5120527778 | Quintana Roo | MEXICO | 89, 90 |
| <i>Lutzomyia</i>   | <i>deleoni</i>     | Chetumal - S3 | -88.3227888889 | 18.5120527778 | Quintana Roo | MEXICO | 89, 90 |
| <i>Lutzomyia</i>   | <i>olmeca</i>      | Chetumal - S3 | -88.3227888889 | 18.5120527778 | Quintana Roo | MEXICO | 89, 90 |
| <i>Lutzomyia</i>   | <i>shannoni</i>    | Chetumal - S3 | -88.3227888889 | 18.5120527778 | Quintana Roo | MEXICO | 89, 90 |
| <i>Lutzomyia</i>   | <i>cruciata</i>    | Chetumal - S3 | -88.3227888889 | 18.5120527778 | Quintana Roo | MEXICO | 89, 90 |
| <i>Lutzomyia</i>   | <i>deleoni</i>     | Chetumal - S4 | -88.3380000000 | 18.4877416633 | Quintana Roo | MEXICO | 89, 90 |
| <i>Brumptomyia</i> | <i>mesai</i>       | Chetumal - S4 | -88.3380000000 | 18.4877416633 | Quintana Roo | MEXICO | 89, 90 |

|                  |                      |               |                |               |              |        |        |
|------------------|----------------------|---------------|----------------|---------------|--------------|--------|--------|
| <i>Lutzomyia</i> | <i>olmeca</i>        | Chetumal - S4 | -88.3380000000 | 18.4877416633 | Quintana Roo | MEXICO | 89, 90 |
| <i>Lutzomyia</i> | <i>trinidadensis</i> | Chetumal - S4 | -88.3380000000 | 18.4877416633 | Quintana Roo | MEXICO | 89, 90 |
| <i>Lutzomyia</i> | <i>cruciata</i>      | Chetumal - S4 | -88.3380000000 | 18.4877416633 | Quintana Roo | MEXICO | 89, 90 |
| <i>Lutzomyia</i> | <i>deleoni</i>       | Chetumal - S5 | -88.3471638889 | 18.5095305556 | Quintana Roo | MEXICO | 89, 90 |
| <i>Lutzomyia</i> | <i>ylephiletor</i>   | Chetumal - S5 | -88.3471638889 | 18.5095305556 | Quintana Roo | MEXICO | 89, 90 |
| <i>Lutzomyia</i> | <i>olmeca</i>        | Chetumal - S5 | -88.3471638889 | 18.5095305556 | Quintana Roo | MEXICO | 89, 90 |
| <i>Lutzomyia</i> | <i>shannoni</i>      | Chetumal - S5 | -88.3471638889 | 18.5095305556 | Quintana Roo | MEXICO | 89, 90 |
| <i>Lutzomyia</i> | <i>cruciata</i>      | Chetumal - S5 | -88.3471638889 | 18.5095305556 | Quintana Roo | MEXICO | 89, 90 |
| <i>Lutzomyia</i> | <i>deleoni</i>       | Chetumal - S6 | -88.3366166666 | 18.4975694441 | Quintana Roo | MEXICO | 89, 90 |
| <i>Lutzomyia</i> | <i>olmeca</i>        | Chetumal - S6 | -88.3366166666 | 18.4975694441 | Quintana Roo | MEXICO | 89, 90 |
| <i>Lutzomyia</i> | <i>cruciata</i>      | Chetumal - S6 | -88.3366166666 | 18.4975694441 | Quintana Roo | MEXICO | 89, 90 |
| <i>Lutzomyia</i> | <i>deleoni</i>       | Chetumal - S7 | -88.3359750000 | 18.4880861111 | Quintana Roo | MEXICO | 89, 90 |
| <i>Lutzomyia</i> | <i>olmeca</i>        | Chetumal - S7 | -88.3359750000 | 18.4880861111 | Quintana Roo | MEXICO | 89, 90 |

|                  |                      |                     |                |               |                              |        |         |
|------------------|----------------------|---------------------|----------------|---------------|------------------------------|--------|---------|
| <i>Lutzomyia</i> | <i>cruciata</i>      | Chetumal - S7       | -88.3359750000 | 18.4880861111 | Quintana Roo                 | MEXICO | 89, 90  |
| <i>Lutzomyia</i> | <i>shannoni</i>      | Chewacla State Park | -85.4727250000 | 32.5511000000 | Alabama                      | USA    | 105     |
| <i>Lutzomyia</i> | <i>chiapanensis</i>  | Chiapa de Corzo     | -93.0138888889 | 16.7069444444 | Chiapas                      | MEXICO | 28      |
| <i>Lutzomyia</i> | <i>longipalpis</i>   | Chichen Itza        | -88.5686444444 | 20.6826027778 | Yucatan                      | MEXICO | 36      |
| <i>Lutzomyia</i> | <i>trinidadensis</i> | Chichen Itza        | -88.5686444444 | 20.6826027778 | Yucatan                      | MEXICO | 37      |
| <i>Lutzomyia</i> | <i>shannoni</i>      | Chiltoyac           | -96.8641666667 | 19.5747222222 | Veracruz Ignacio de la Llave | MEXICO | 51      |
| <i>Lutzomyia</i> | <i>texana</i>        | Chiltoyac           | -96.8641666667 | 19.5747222222 | Veracruz Ignacio de la Llave | MEXICO | 51      |
| <i>Lutzomyia</i> | <i>cruciata</i>      | Chiltoyac           | -96.8641666667 | 19.5747222222 | Veracruz Ignacio de la Llave | MEXICO | 51      |
| <i>Lutzomyia</i> | <i>steatopyga</i>    | Chiquibul           | -88.9695694444 | 17.1691194444 | Distrito el Cayo             | BELIZE | 99, 100 |
| <i>Lutzomyia</i> | <i>trinidadensis</i> | Chiquibul           | -88.9695694444 | 17.1691194444 | Distrito el Cayo             | BELIZE | 99, 100 |
| <i>Lutzomyia</i> | <i>shannoni</i>      | Chiquibul           | -88.9695694444 | 17.1691194444 | Distrito el Cayo             | BELIZE | 99, 100 |
| <i>Lutzomyia</i> | <i>ovallesi</i>      | Chiquibul           | -88.9695694444 | 17.1691194444 | Distrito el Cayo             | BELIZE | 99, 100 |
| <i>Lutzomyia</i> | <i>panamensis</i>    | Chiquibul           | -88.9695694444 | 17.1691194444 | Distrito el Cayo             | BELIZE | 99, 100 |

|                    |                    |           |                |               |                  |        |         |
|--------------------|--------------------|-----------|----------------|---------------|------------------|--------|---------|
| <i>Lutzomyia</i>   | <i>olmeca</i>      | Chiquibul | -88.9695694444 | 17.1691194444 | Distrito el Cayo | BELIZE | 99, 100 |
| <i>Lutzomyia</i>   | <i>deleoni</i>     | Chiquibul | -88.9695694444 | 17.1691194444 | Distrito el Cayo | BELIZE | 99, 100 |
| <i>Lutzomyia</i>   | <i>ylephiletor</i> | Chiquibul | -88.9695694444 | 17.1691194444 | Distrito el Cayo | BELIZE | 99, 100 |
| <i>Lutzomyia</i>   | <i>carpenteri</i>  | Chiquibul | -88.9695694444 | 17.1691194444 | Distrito el Cayo | BELIZE | 99, 100 |
| <i>Lutzomyia</i>   | <i>permira</i>     | Chiquibul | -88.9695694444 | 17.1691194444 | Distrito el Cayo | BELIZE | 99, 100 |
| <i>Brumptomyia</i> | <i>mesai</i>       | Chiquibul | -88.9695694444 | 17.1691194444 | Distrito el Cayo | BELIZE | 57      |
| <i>Lutzomyia</i>   | <i>bispinosa</i>   | Chiquibul | -88.9695694444 | 17.1691194444 | Distrito el Cayo | BELIZE | 57      |
| <i>Lutzomyia</i>   | <i>cayennensis</i> | Chiquibul | -88.9695694444 | 17.1691194444 | Distrito el Cayo | BELIZE | 57      |
| <i>Lutzomyia</i>   | <i>beltrani</i>    | Chiquibul | -88.9695694444 | 17.1691194444 | Distrito el Cayo | BELIZE | 57      |
| <i>Lutzomyia</i>   | <i>cruciata</i>    | Chiquibul | -88.9695694444 | 17.1691194444 | Distrito el Cayo | BELIZE | 99, 100 |
| <i>Lutzomyia</i>   | <i>shannoni</i>    | Christian | -87.4603972222 | 36.8410583333 | Kentucky         | USA    | 67      |
| <i>Lutzomyia</i>   | <i>vexator</i>     | Christian | -87.4603972222 | 36.8410583333 | Kentucky         | USA    | 67      |
| <i>Lutzomyia</i>   | <i>cayennensis</i> | Chumpom   | -87.7661329078 | 19.9611396269 | Quintana Roo     | MEXICO | 58      |

|                    |                      |         |                |               |              |        |    |
|--------------------|----------------------|---------|----------------|---------------|--------------|--------|----|
| <i>Lutzomyia</i>   | <i>deleoni</i>       | Chumpom | -87.7661329078 | 19.9611396269 | Quintana Roo | MEXICO | 58 |
| <i>Lutzomyia</i>   | <i>shannoni</i>      | Chumpom | -87.7661329078 | 19.9611396269 | Quintana Roo | MEXICO | 58 |
| <i>Lutzomyia</i>   | <i>steatopyga</i>    | Chumpom | -87.7661329078 | 19.9611396269 | Quintana Roo | MEXICO | 58 |
| <i>Lutzomyia</i>   | <i>trinidadensis</i> | Chumpom | -87.7661329078 | 19.9611396269 | Quintana Roo | MEXICO | 58 |
| <i>Lutzomyia</i>   | <i>olmeca</i>        | Chumpom | -87.7661329078 | 19.9611396269 | Quintana Roo | MEXICO | 58 |
| <i>Lutzomyia</i>   | <i>cratifer</i>      | Chumpom | -87.7661329078 | 19.9611396269 | Quintana Roo | MEXICO | 58 |
| <i>Lutzomyia</i>   | <i>undulata</i>      | Chumpom | -87.7661329078 | 19.9611396269 | Quintana Roo | MEXICO | 58 |
| <i>Lutzomyia</i>   | <i>cratifer</i>      | Chumpom | -87.7701552139 | 19.9648541270 | Quintana Roo | MEXICO | 58 |
| <i>Brumptomyia</i> | <i>mesai</i>         | Chumpom | -87.7701552139 | 19.9648541270 | Quintana Roo | MEXICO | 58 |
| <i>Lutzomyia</i>   | <i>cayennensis</i>   | Chumpom | -87.7701552139 | 19.9648541270 | Quintana Roo | MEXICO | 58 |
| <i>Lutzomyia</i>   | <i>olmeca</i>        | Chumpom | -87.7701552139 | 19.9648541270 | Quintana Roo | MEXICO | 58 |
| <i>Lutzomyia</i>   | <i>ovallesi</i>      | Chumpom | -87.7701552139 | 19.9648541270 | Quintana Roo | MEXICO | 58 |
| <i>Lutzomyia</i>   | <i>serrana</i>       | Chumpom | -87.7701552139 | 19.9648541270 | Quintana Roo | MEXICO | 58 |

|                  |                      |             |                |               |              |        |    |
|------------------|----------------------|-------------|----------------|---------------|--------------|--------|----|
| <i>Lutzomyia</i> | <i>shannoni</i>      | Chumpom     | -87.7701552139 | 19.9648541270 | Quintana Roo | MEXICO | 58 |
| <i>Lutzomyia</i> | <i>steatopyga</i>    | Chumpom     | -87.7701552139 | 19.9648541270 | Quintana Roo | MEXICO | 58 |
| <i>Lutzomyia</i> | <i>undulata</i>      | Chumpom     | -87.7701552139 | 19.9648541270 | Quintana Roo | MEXICO | 58 |
| <i>Lutzomyia</i> | <i>cruciata</i>      | Chumpom     | -87.7661329078 | 19.9611396269 | Quintana Roo | MEXICO | 58 |
| <i>Lutzomyia</i> | <i>cruciata</i>      | Chumpom     | -87.7701552139 | 19.9648541270 | Quintana Roo | MEXICO | 58 |
| <i>Lutzomyia</i> | <i>trinidadensis</i> | Chum-Yaxche | -87.6144444444 | 20.0763888889 | Quintana Roo | MEXICO | 18 |
| <i>Lutzomyia</i> | <i>cayennensis</i>   | Chum-Yaxche | -87.6144444444 | 20.0763888889 | Quintana Roo | MEXICO | 18 |
| <i>Lutzomyia</i> | <i>shannoni</i>      | Chum-Yaxche | -87.6144444444 | 20.0763888889 | Quintana Roo | MEXICO | 18 |
| <i>Lutzomyia</i> | <i>deleoni</i>       | Chum-Yaxche | -87.6144444444 | 20.0763888889 | Quintana Roo | MEXICO | 18 |
| <i>Lutzomyia</i> | <i>olmeca</i>        | Chum-Yaxche | -87.6144444444 | 20.0763888889 | Quintana Roo | MEXICO | 18 |
| <i>Lutzomyia</i> | <i>panamensis</i>    | Chum-Yaxche | -87.6144444444 | 20.0763888889 | Quintana Roo | MEXICO | 18 |
| <i>Lutzomyia</i> | <i>cruciata</i>      | Chum-Yaxche | -87.6144444444 | 20.0763888889 | Quintana Roo | MEXICO | 18 |
| <i>Lutzomyia</i> | <i>trinidadensis</i> | Chunhuas    | -88.2105555556 | 19.6319444444 | Quintana Roo | MEXICO | 18 |

|                    |                    |           |                |               |              |        |    |
|--------------------|--------------------|-----------|----------------|---------------|--------------|--------|----|
| <i>Lutzomyia</i>   | <i>cayennensis</i> | Chunhuas  | -88.2105555556 | 19.6319444444 | Quintana Roo | MEXICO | 18 |
| <i>Lutzomyia</i>   | <i>shannoni</i>    | Chunhuas  | -88.2105555556 | 19.6319444444 | Quintana Roo | MEXICO | 18 |
| <i>Lutzomyia</i>   | <i>olmeca</i>      | Chunhuas  | -88.2105555556 | 19.6319444444 | Quintana Roo | MEXICO | 18 |
| <i>Lutzomyia</i>   | <i>panamensis</i>  | Chunhuas  | -88.2105555556 | 19.6319444444 | Quintana Roo | MEXICO | 18 |
| <i>Lutzomyia</i>   | <i>deleoni</i>     | Chunhuas  | -88.2105555556 | 19.6319444444 | Quintana Roo | MEXICO | 18 |
| <i>Lutzomyia</i>   | <i>cruciata</i>    | Chunhuas  | -88.2105555556 | 19.6319444444 | Quintana Roo | MEXICO | 18 |
| <i>Lutzomyia</i>   | <i>deleoni</i>     | Chunhuhub | -88.5536796354 | 19.5783123783 | Quintana Roo | MEXICO | 58 |
| <i>Brumptomyia</i> | <i>mesai</i>       | Chunhuhub | -88.5536796354 | 19.5783123783 | Quintana Roo | MEXICO | 58 |
| <i>Brumptomyia</i> | <i>hamata</i>      | Chunhuhub | -88.5536796354 | 19.5783123783 | Quintana Roo | MEXICO | 58 |
| <i>Lutzomyia</i>   | <i>shannoni</i>    | Chunhuhub | -88.5536796354 | 19.5783123783 | Quintana Roo | MEXICO | 58 |
| <i>Lutzomyia</i>   | <i>steatopyga</i>  | Chunhuhub | -88.5536796354 | 19.5783123783 | Quintana Roo | MEXICO | 58 |
| <i>Lutzomyia</i>   | <i>olmeca</i>      | Chunhuhub | -88.5536796354 | 19.5783123783 | Quintana Roo | MEXICO | 58 |
| <i>Lutzomyia</i>   | <i>undulata</i>    | Chunhuhub | -88.5536796354 | 19.5783123783 | Quintana Roo | MEXICO | 58 |

|                    |                      |           |                |               |              |        |    |
|--------------------|----------------------|-----------|----------------|---------------|--------------|--------|----|
| <i>Lutzomyia</i>   | <i>deleoni</i>       | Chunhuhub | -88.5907666667 | 19.5889444444 | Quintana Roo | MEXICO | 70 |
| <i>Lutzomyia</i>   | <i>olmeca</i>        | Chunhuhub | -88.5907666667 | 19.5889444444 | Quintana Roo | MEXICO | 70 |
| <i>Lutzomyia</i>   | <i>ovallesi</i>      | Chunhuhub | -88.5907666667 | 19.5889444444 | Quintana Roo | MEXICO | 70 |
| <i>Lutzomyia</i>   | <i>steatopyga</i>    | Chunhuhub | -88.5907666667 | 19.5889444444 | Quintana Roo | MEXICO | 70 |
| <i>Lutzomyia</i>   | <i>shannoni</i>      | Chunhuhub | -88.5907666667 | 19.5889444444 | Quintana Roo | MEXICO | 70 |
| <i>Lutzomyia</i>   | <i>carpenteri</i>    | Chunhuhub | -88.5638410151 | 19.5872409680 | Quintana Roo | MEXICO | 58 |
| <i>Brumptomyia</i> | <i>mesai</i>         | Chunhuhub | -88.5638410151 | 19.5872409680 | Quintana Roo | MEXICO | 58 |
| <i>Brumptomyia</i> | <i>hamata</i>        | Chunhuhub | -88.5638410151 | 19.5872409680 | Quintana Roo | MEXICO | 58 |
| <i>Lutzomyia</i>   | <i>shannoni</i>      | Chunhuhub | -88.5638410151 | 19.5872409680 | Quintana Roo | MEXICO | 58 |
| <i>Lutzomyia</i>   | <i>steatopyga</i>    | Chunhuhub | -88.5638410151 | 19.5872409680 | Quintana Roo | MEXICO | 58 |
| <i>Lutzomyia</i>   | <i>deleoni</i>       | Chunhuhub | -88.5638410151 | 19.5872409680 | Quintana Roo | MEXICO | 58 |
| <i>Lutzomyia</i>   | <i>olmeca</i>        | Chunhuhub | -88.5638410151 | 19.5872409680 | Quintana Roo | MEXICO | 58 |
| <i>Lutzomyia</i>   | <i>trinidadensis</i> | Chunhuhub | -88.5638410151 | 19.5872409680 | Quintana Roo | MEXICO | 58 |

|                    |                   |               |                |               |              |        |    |
|--------------------|-------------------|---------------|----------------|---------------|--------------|--------|----|
| <i>Lutzomyia</i>   | <i>undulata</i>   | Chunhuhub     | -88.5638410151 | 19.5872409680 | Quintana Roo | MEXICO | 58 |
| <i>Lutzomyia</i>   | <i>cruciata</i>   | Chunhuhub     | -88.5536796354 | 19.5783123783 | Quintana Roo | MEXICO | 58 |
| <i>Lutzomyia</i>   | <i>cruciata</i>   | Chunhuhub     | -88.5907666667 | 19.5889444444 | Quintana Roo | MEXICO | 70 |
| <i>Lutzomyia</i>   | <i>cruciata</i>   | Chunhuhub     | -88.5638410151 | 19.5872409680 | Quintana Roo | MEXICO | 58 |
| <i>Lutzomyia</i>   | <i>serrana</i>    | Chuxnaban     | -95.7572222222 | 17.7647222222 | Oaxaca       | MEXICO | 38 |
| <i>Lutzomyia</i>   | <i>shannoni</i>   | Chuxnaban     | -95.7572222222 | 17.7647222222 | Oaxaca       | MEXICO | 38 |
| <i>Lutzomyia</i>   | <i>cruciata</i>   | Chuxnaban     | -95.8300000000 | 17.0177777778 | Oaxaca       | MEXICO | 40 |
| <i>Lutzomyia</i>   | <i>deleoni</i>    | Cinco de Mayo | -89.1267444102 | 18.7748866814 | Quintana Roo | MEXICO | 58 |
| <i>Brumptomyia</i> | <i>mesai</i>      | Cinco de Mayo | -89.1267444102 | 18.7748866814 | Quintana Roo | MEXICO | 58 |
| <i>Lutzomyia</i>   | <i>ovallesi</i>   | Cinco de Mayo | -89.1267444102 | 18.7748866814 | Quintana Roo | MEXICO | 58 |
| <i>Lutzomyia</i>   | <i>permira</i>    | Cinco de Mayo | -89.1267444102 | 18.7748866814 | Quintana Roo | MEXICO | 58 |
| <i>Lutzomyia</i>   | <i>shannoni</i>   | Cinco de Mayo | -89.1267444102 | 18.7748866814 | Quintana Roo | MEXICO | 58 |
| <i>Lutzomyia</i>   | <i>panamensis</i> | Cinco de Mayo | -89.1267444102 | 18.7748866814 | Quintana Roo | MEXICO | 58 |

|                  |                    |               |                |               |                              |        |        |
|------------------|--------------------|---------------|----------------|---------------|------------------------------|--------|--------|
| <i>Lutzomyia</i> | <i>steatopyga</i>  | Cinco de Mayo | -89.1267444102 | 18.7748866814 | Quintana Roo                 | MEXICO | 58     |
| <i>Lutzomyia</i> | <i>cayennensis</i> | Cinco de Mayo | -89.1266244690 | 18.7759087686 | Quintana Roo                 | MEXICO | 58     |
| <i>Lutzomyia</i> | <i>deleoni</i>     | Cinco de Mayo | -89.1266244690 | 18.7759087686 | Quintana Roo                 | MEXICO | 58     |
| <i>Lutzomyia</i> | <i>longipalpis</i> | Cinco de Mayo | -89.1266244690 | 18.7759087686 | Quintana Roo                 | MEXICO | 58     |
| <i>Lutzomyia</i> | <i>olmeca</i>      | Cinco de Mayo | -89.1266244690 | 18.7759087686 | Quintana Roo                 | MEXICO | 58     |
| <i>Lutzomyia</i> | <i>ovallesi</i>    | Cinco de Mayo | -89.1266244690 | 18.7759087686 | Quintana Roo                 | MEXICO | 58     |
| <i>Lutzomyia</i> | <i>panamensis</i>  | Cinco de Mayo | -89.1266244690 | 18.7759087686 | Quintana Roo                 | MEXICO | 58     |
| <i>Lutzomyia</i> | <i>shannoni</i>    | Cinco de Mayo | -89.1266244690 | 18.7759087686 | Quintana Roo                 | MEXICO | 58     |
| <i>Lutzomyia</i> | <i>cruciata</i>    | Cinco de Mayo | -89.1267444102 | 18.7748866814 | Quintana Roo                 | MEXICO | 58     |
| <i>Lutzomyia</i> | <i>cruciata</i>    | Cinco de Mayo | -89.1266244690 | 18.7759087686 | Quintana Roo                 | MEXICO | 58     |
| <i>Lutzomyia</i> | <i>shannoni</i>    | Clinton Hids  | -90.3217591667 | 32.3415833333 | Mississippi                  | USA    | 88     |
| <i>Lutzomyia</i> | <i>shannoni</i>    | Coatzacoalcos | -94.4633333333 | 18.1358333333 | Veracruz Ignacio de la Llave | MEXICO | 40     |
| <i>Lutzomyia</i> | <i>cayennensis</i> | Coba          | -87.7098331209 | 20.4967340282 | Quintana Roo                 | MEXICO | 18, 58 |

|                    |                      |      |                |               |              |        |        |
|--------------------|----------------------|------|----------------|---------------|--------------|--------|--------|
| <i>Brumptomyia</i> | <i>mesai</i>         | Coba | -87.7098331209 | 20.4967340282 | Quintana Roo | MEXICO | 58     |
| <i>Lutzomyia</i>   | <i>shannoni</i>      | Coba | -87.7098331209 | 20.4967340282 | Quintana Roo | MEXICO | 58     |
| <i>Lutzomyia</i>   | <i>steatopyga</i>    | Coba | -87.7098331209 | 20.4967340282 | Quintana Roo | MEXICO | 58     |
| <i>Lutzomyia</i>   | <i>trinidadensis</i> | Coba | -87.7098331209 | 20.4967340282 | Quintana Roo | MEXICO | 58     |
| <i>Lutzomyia</i>   | <i>olmeca</i>        | Coba | -87.7098331209 | 20.4967340282 | Quintana Roo | MEXICO | 18, 58 |
| <i>Lutzomyia</i>   | <i>cratifer</i>      | Coba | -87.7098331209 | 20.4967340282 | Quintana Roo | MEXICO | 58     |
| <i>Lutzomyia</i>   | <i>undulata</i>      | Coba | -87.7098331209 | 20.4967340282 | Quintana Roo | MEXICO | 58     |
| <i>Lutzomyia</i>   | <i>cayennensis</i>   | Coba | -87.7306129576 | 20.5046443636 | Quintana Roo | MEXICO | 58     |
| <i>Lutzomyia</i>   | <i>cratifer</i>      | Coba | -87.7306129576 | 20.5046443636 | Quintana Roo | MEXICO | 58     |
| <i>Lutzomyia</i>   | <i>deleoni</i>       | Coba | -87.7306129576 | 20.5046443636 | Quintana Roo | MEXICO | 58     |
| <i>Lutzomyia</i>   | <i>longipalpis</i>   | Coba | -87.7306129576 | 20.5046443636 | Quintana Roo | MEXICO | 58     |
| <i>Brumptomyia</i> | <i>mesai</i>         | Coba | -87.7306129576 | 20.5046443636 | Quintana Roo | MEXICO | 58     |
| <i>Lutzomyia</i>   | <i>olmeca</i>        | Coba | -87.7306129576 | 20.5046443636 | Quintana Roo | MEXICO | 58     |

|                  |                    |        |                |               |              |           |            |
|------------------|--------------------|--------|----------------|---------------|--------------|-----------|------------|
| <i>Lutzomyia</i> | <i>ovallesi</i>    | Coba   | -87.7306129576 | 20.5046443636 | Quintana Roo | MEXICO    | 58         |
| <i>Lutzomyia</i> | <i>serrana</i>     | Coba   | -87.7306129576 | 20.5046443636 | Quintana Roo | MEXICO    | 58         |
| <i>Lutzomyia</i> | <i>steatopyga</i>  | Coba   | -87.7306129576 | 20.5046443636 | Quintana Roo | MEXICO    | 58         |
| <i>Lutzomyia</i> | <i>undulata</i>    | Coba   | -87.7306129576 | 20.5046443636 | Quintana Roo | MEXICO    | 58         |
| <i>Lutzomyia</i> | <i>deleoni</i>     | Coba   | -87.7098331209 | 20.4967340282 | Quintana Roo | MEXICO    | 18         |
| <i>Lutzomyia</i> | <i>shannoni</i>    | Coba   | -87.7098331209 | 20.4967340282 | Quintana Roo | MEXICO    | 18         |
| <i>Lutzomyia</i> | <i>panamensis</i>  | Coba   | -87.7352777778 | 20.4947222222 | Quintana Roo | MEXICO    | 18         |
| <i>Lutzomyia</i> | <i>cruciata</i>    | Coba   | -87.7098331209 | 20.4967340282 | Quintana Roo | MEXICO    | 58         |
| <i>Lutzomyia</i> | <i>cruciata</i>    | Coba   | -87.7306129576 | 20.5046443636 | Quintana Roo | MEXICO    | 58         |
| <i>Lutzomyia</i> | <i>cruciata</i>    | Coba   | -87.7098331209 | 20.4967340282 | Quintana Roo | MEXICO    | 18         |
| <i>Lutzomyia</i> | <i>ylephiletor</i> | Coban  | -90.3715361111 | 15.4710666667 | Alta Verapaz | GUATEMALA | 47         |
| <i>Lutzomyia</i> | <i>cruciata</i>    | Coban  | -90.3715361111 | 15.4710666667 | Alta Verapaz | GUATEMALA | 43, 57     |
| <i>Lutzomyia</i> | <i>diabolica</i>   | Cocula | -99.6636111111 | 18.2366666600 | Guerrero     | MEXICO    | 43, 96, 97 |

|                  |                    |                 |                 |               |                  |        |          |
|------------------|--------------------|-----------------|-----------------|---------------|------------------|--------|----------|
| <i>Lutzomyia</i> | <i>dodgei</i>      | Cocula          | -99.6636111111  | 18.2366666600 | Guerrero         | MEXICO | 96, 97   |
| <i>Lutzomyia</i> | <i>cayennensis</i> | Cocula          | -99.6636111111  | 18.2366666600 | Guerrero         | MEXICO | 38       |
| <i>Lutzomyia</i> | <i>shannoni</i>    | Cocula          | -99.6636111111  | 18.2366666600 | Guerrero         | MEXICO | 40       |
| <i>Lutzomyia</i> | <i>cruciata</i>    | Cocula          | -99.6636111111  | 18.2366666600 | Guerrero         | MEXICO | 40       |
| <i>Lutzomyia</i> | <i>diabolica</i>   | Cola de Caballo | -100.1612222222 | 25.3846444440 | Nuevo Leon       | MEXICO | 32       |
| <i>Lutzomyia</i> | <i>cruciata</i>    | Cola de Caballo | -100.1612222222 | 25.3846444440 | Nuevo Leon       | MEXICO | 40       |
| <i>Lutzomyia</i> | <i>olmeca</i>      | Comacalco       | -93.2247222222  | 18.2716666666 | Tabasco          | MEXICO | 40       |
| <i>Lutzomyia</i> | <i>diabolica</i>   | Comstock        | -101.1734388889 | 29.6843805556 | Texas            | USA    | 104, 105 |
| <i>Lutzomyia</i> | <i>vexator</i>     | Connecticut     | -73.1004833333  | 41.6032055556 | Connecticut      | USA    | 2        |
| <i>Lutzomyia</i> | <i>panamensis</i>  | Cool Shade      | -88.9666667000  | 17.1666667000 | Distrito el Cayo | BELIZE | 53       |
| <i>Lutzomyia</i> | <i>bispinosa</i>   | Cool Shade      | -88.9666667000  | 17.1666667000 | Distrito el Cayo | BELIZE | 53       |
| <i>Lutzomyia</i> | <i>shannoni</i>    | Cool Shade      | -88.9666667000  | 17.1666667000 | Distrito el Cayo | BELIZE | 53       |
| <i>Lutzomyia</i> | <i>ovallesi</i>    | Cool Shade      | -88.9666667000  | 17.1666667000 | Distrito el Cayo | BELIZE | 53       |

|                  |                    |                                    |                 |               |                              |        |            |
|------------------|--------------------|------------------------------------|-----------------|---------------|------------------------------|--------|------------|
| <i>Lutzomyia</i> | <i>permira</i>     | Cool Shade                         | -88.9666667000  | 17.1666667000 | Distrito el Cayo             | BELIZE | 57, 99     |
| <i>Lutzomyia</i> | <i>olmeca</i>      | Cool Shade                         | -88.9666667000  | 17.1666667000 | Distrito el Cayo             | BELIZE | 57, 99     |
| <i>Lutzomyia</i> | <i>cruciata</i>    | Cool Shade                         | -88.9666667000  | 17.1666667000 | Distrito el Cayo             | BELIZE | 53         |
| <i>Lutzomyia</i> | <i>shannoni</i>    | Copiah County Game Management Area | -90.3736666667  | 31.8990833333 | Mississippi                  | USA    | 39         |
| <i>Lutzomyia</i> | <i>shannoni</i>    | Corkscrew Swamp                    | -90.4974361111  | 35.9904111111 | Arkansas                     | USA    | 105        |
| <i>Lutzomyia</i> | <i>cruciata</i>    | Corozal Pacifico                   | -96.5250000000  | 15.8836111111 | Oaxaca                       | MEXICO | 40         |
| <i>Lutzomyia</i> | <i>diabolica</i>   | Corpus Christi                     | -97.3963805556  | 27.8005833333 | Texas                        | USA    | 104, 105   |
| <i>Lutzomyia</i> | <i>shannoni</i>    | Cosoleacaque                       | -94.6369400000  | 17.9952800000 | Veracruz Ignacio de la Llave | MEXICO | 50         |
| <i>Lutzomyia</i> | <i>cruciata</i>    | COSOMALOAPAN                       | -95.7908333333  | 18.3766666667 | Veracruz Ignacio de la Llave | MEXICO | 40         |
| <i>Lutzomyia</i> | <i>olmeca</i>      | Coyolar                            | -94.3688890000  | 17.9205560000 | Veracruz Ignacio de la Llave | MEXICO | 47         |
| <i>Lutzomyia</i> | <i>californica</i> | Coyote Creek                       | -118.0127138889 | 33.8593222222 | California                   | USA    | 105        |
| <i>Lutzomyia</i> | <i>dodgei</i>      | Cuautla                            | -98.9548555556  | 18.8126166666 | Morelos                      | MEXICO | 45, 96, 97 |
| <i>Lutzomyia</i> | <i>texana</i>      | Cuautla                            | -98.9548555556  | 18.8126166666 | Morelos                      | MEXICO | 105        |

|                  |                    |               |                 |               |                              |        |              |
|------------------|--------------------|---------------|-----------------|---------------|------------------------------|--------|--------------|
| <i>Lutzomyia</i> | <i>stewarti</i>    | Culp Valley   | -117.1570166667 | 32.7167388889 | California                   | USA    | 8            |
| <i>Lutzomyia</i> | <i>olmeca</i>      | Cunduacan     | -93.1755555556  | 18.0672222222 | Tabasco                      | MEXICO | 40           |
| <i>Lutzomyia</i> | <i>cruciata</i>    | Cunduacan     | -93.1755555556  | 18.0672222222 | Tabasco                      | MEXICO | 40           |
| <i>Lutzomyia</i> | <i>anthophora</i>  | D'Anis Site 1 | -99.2797638889  | 29.3304722222 | Texas                        | USA    | 104, 105     |
| <i>Lutzomyia</i> | <i>anthophora</i>  | Del Rio       | -100.3958666667 | 29.3707305556 | Texas                        | USA    | 104, 105     |
| <i>Lutzomyia</i> | <i>californica</i> | Del Rio       | -100.3958666667 | 29.3707305556 | Texas                        | USA    | 104, 105     |
| <i>Lutzomyia</i> | <i>texana</i>      | Del Rio       | -100.3958666667 | 29.3707305556 | Texas                        | USA    | 25, 104, 105 |
| <i>Lutzomyia</i> | <i>diabolica</i>   | D'Anis Site 1 | -99.2797638889  | 29.3304722222 | Texas                        | USA    | 104, 105     |
| <i>Lutzomyia</i> | <i>anthophora</i>  | D'Anis Site 2 | -99.0350000000  | 29.0350000000 | Texas                        | USA    | 61           |
| <i>Lutzomyia</i> | <i>diabolica</i>   | D'Anis Site 2 | -99.0350000000  | 29.0350000000 | Texas                        | USA    | 61           |
| <i>Lutzomyia</i> | <i>texana</i>      | D'Anis Site 2 | -99.0350000000  | 29.0350000000 | Texas                        | USA    | 61           |
| <i>Lutzomyia</i> | <i>cruciata</i>    | Dimas Lopez   | -97.6363888855  | 20.1605555555 | Puebla                       | MEXICO | 43           |
| <i>Lutzomyia</i> | <i>cruciata</i>    | Dos Arroyo    | -96.6919444444  | 19.8668416667 | Veracruz Ignacio de la Llave | MEXICO | 50           |

|                    |                      |                 |                |               |          |           |            |
|--------------------|----------------------|-----------------|----------------|---------------|----------|-----------|------------|
| <i>Lutzomyia</i>   | <i>permira</i>       | Dos Lagunas     | -89.5321111111 | 17.6796611111 | Peten    | GUATEMALA | 45, 46, 57 |
| <i>Brumptomyia</i> | <i>mesai</i>         | Dos Lagunas Sur | -89.3366666667 | 17.9274999999 | Campeche | MEXICO    | 73         |
| <i>Brumptomyia</i> | <i>hamata</i>        | Dos Lagunas Sur | -89.3366666667 | 17.9274999999 | Campeche | MEXICO    | 73         |
| <i>Lutzomyia</i>   | <i>carpenteri</i>    | Dos Lagunas Sur | -89.3366666667 | 17.9274999999 | Campeche | MEXICO    | 73         |
| <i>Lutzomyia</i>   | <i>deleoni</i>       | Dos Lagunas Sur | -89.3366666667 | 17.9274999999 | Campeche | MEXICO    | 73         |
| <i>Lutzomyia</i>   | <i>olmeca</i>        | Dos Lagunas Sur | -89.3366666667 | 17.9274999999 | Campeche | MEXICO    | 73         |
| <i>Lutzomyia</i>   | <i>ovallesi</i>      | Dos Lagunas Sur | -89.3366666667 | 17.9274999999 | Campeche | MEXICO    | 73         |
| <i>Lutzomyia</i>   | <i>panamensis</i>    | Dos Lagunas Sur | -89.3366666667 | 17.9274999999 | Campeche | MEXICO    | 73         |
| <i>Lutzomyia</i>   | <i>shannoni</i>      | Dos Lagunas Sur | -89.3366666667 | 17.9274999999 | Campeche | MEXICO    | 73         |
| <i>Lutzomyia</i>   | <i>trinidadensis</i> | Dos Lagunas Sur | -89.3366666667 | 17.9274999999 | Campeche | MEXICO    | 73         |
| <i>Lutzomyia</i>   | <i>ylephiletor</i>   | Dos Lagunas Sur | -89.3366666667 | 17.9274999999 | Campeche | MEXICO    | 73         |
| <i>Lutzomyia</i>   | <i>steatopyga</i>    | Dos Lagunas Sur | -89.3366666667 | 17.9274999999 | Campeche | MEXICO    | 73         |
| <i>Lutzomyia</i>   | <i>cruciata</i>      | Dos Lagunas Sur | -89.3366666667 | 17.9274999999 | Campeche | MEXICO    | 73         |

|                    |                      |              |                |               |          |        |        |
|--------------------|----------------------|--------------|----------------|---------------|----------|--------|--------|
| <i>Brumptomyia</i> | <i>mesai</i>         | Dos Naciones | -89.3456666667 | 17.9833333333 | Campeche | MEXICO | 80, 83 |
| <i>Brumptomyia</i> | <i>hamata</i>        | Dos Naciones | -89.3456666667 | 17.9833333333 | Campeche | MEXICO | 80, 83 |
| <i>Lutzomyia</i>   | <i>deleoni</i>       | Dos Naciones | -89.3456666667 | 17.9833333333 | Campeche | MEXICO | 80, 83 |
| <i>Lutzomyia</i>   | <i>carpenteri</i>    | Dos Naciones | -89.3456666667 | 17.9833333333 | Campeche | MEXICO | 80, 83 |
| <i>Lutzomyia</i>   | <i>longipalpis</i>   | Dos Naciones | -89.3456666667 | 17.9833333333 | Campeche | MEXICO | 80, 83 |
| <i>Lutzomyia</i>   | <i>shannoni</i>      | Dos Naciones | -89.3456666667 | 17.9833333333 | Campeche | MEXICO | 80, 83 |
| <i>Lutzomyia</i>   | <i>undulata</i>      | Dos Naciones | -89.3456666667 | 17.9833333333 | Campeche | MEXICO | 80, 83 |
| <i>Lutzomyia</i>   | <i>ylephiletor</i>   | Dos Naciones | -89.3456666667 | 17.9833333333 | Campeche | MEXICO | 80, 83 |
| <i>Lutzomyia</i>   | <i>ovallesi</i>      | Dos Naciones | -89.3456666667 | 17.9833333333 | Campeche | MEXICO | 80, 83 |
| <i>Lutzomyia</i>   | <i>panamensis</i>    | Dos Naciones | -89.3456666667 | 17.9833333333 | Campeche | MEXICO | 80, 83 |
| <i>Lutzomyia</i>   | <i>trinidadensis</i> | Dos Naciones | -89.3456666667 | 17.9833333333 | Campeche | MEXICO | 80, 83 |
| <i>Lutzomyia</i>   | <i>olmeca</i>        | Dos Naciones | -89.3456666667 | 17.9833333333 | Campeche | MEXICO | 80, 83 |
| <i>Lutzomyia</i>   | <i>cruciata</i>      | Dos Naciones | -89.3456666667 | 17.9833333333 | Campeche | MEXICO | 80, 83 |

|                  |                    |                                   |                |               |                              |        |        |
|------------------|--------------------|-----------------------------------|----------------|---------------|------------------------------|--------|--------|
| <i>Lutzomyia</i> | <i>shannoni</i>    | Dumac (Ducks Unlimited de Mexico) | -90.3833333333 | 20.5833333333 | Yucatan                      | MEXICO | 40     |
| <i>Lutzomyia</i> | <i>olmeca</i>      | Dzibalché                         | -89.7313900000 | 19.4583300000 | Campeche                     | MEXICO | 83     |
| <i>Lutzomyia</i> | <i>shannoni</i>    | Dzibalché                         | -89.7313900000 | 19.4583300000 | Campeche                     | MEXICO | 83     |
| <i>Lutzomyia</i> | <i>cruciata</i>    | Dzibalché                         | -89.7313900000 | 19.4583300000 | Campeche                     | MEXICO | 83     |
| <i>Lutzomyia</i> | <i>shannoni</i>    | Ecoparaíso                        | -90.3702777778 | 20.9408333333 | Yucatan                      | MEXICO | 40     |
| <i>Lutzomyia</i> | <i>shannoni</i>    | Edith                             | -82.5512861111 | 30.6785638889 | Georgia                      | USA    | 105    |
| <i>Lutzomyia</i> | <i>panamensis</i>  | El Ajengibre                      | -97.6786111111 | 20.4380555556 | Puebla                       | MEXICO | 40     |
| <i>Lutzomyia</i> | <i>shannoni</i>    | El Ajengibre                      | -97.6786111111 | 20.4380555556 | Puebla                       | MEXICO | 40     |
| <i>Lutzomyia</i> | <i>cruciata</i>    | El Ajengibre                      | -97.6786111111 | 20.4380555556 | Puebla                       | MEXICO | 40     |
| <i>Lutzomyia</i> | <i>cayennensis</i> | El Carrizal                       | -97.2523250000 | 20.5987971889 | Veracruz Ignacio de la Llave | MEXICO | 48, 94 |
| <i>Lutzomyia</i> | <i>cruciata</i>    | El Coyul                          | -95.9063888889 | 16.5011111000 | Oaxaca                       | MEXICO | 38     |
| <i>Lutzomyia</i> | <i>cayennensis</i> | El Cuyo                           | -87.6794444444 | 21.5125000000 | Yucatan                      | MEXICO | 38     |
| <i>Lutzomyia</i> | <i>shannoni</i>    | El Dorado                         | -92.6662666667 | 33.2076305556 | Arkansas                     | USA    | 105    |

|                  |                    |               |                |               |                              |        |      |
|------------------|--------------------|---------------|----------------|---------------|------------------------------|--------|------|
| <i>Lutzomyia</i> | <i>shannoni</i>    | El Gavilan    | -90.7468060000 | 18.5872310000 | Campeche                     | Mexico | 3, 4 |
| <i>Lutzomyia</i> | <i>panamensis</i>  | El Gavilan    | -90.7468060000 | 18.5872310000 | Campeche                     | Mexico | 3, 4 |
| <i>Lutzomyia</i> | <i>cruciata</i>    | El Gavilan    | -90.7468060000 | 18.5872310000 | Campeche                     | Mexico | 3, 4 |
| <i>Lutzomyia</i> | <i>shannoni</i>    | El Lechugal   | -90.7333330000 | 18.5638840000 | Campeche                     | MEXICO | 4    |
| <i>Lutzomyia</i> | <i>panamensis</i>  | El Lechugal   | -90.7333330000 | 18.5638840000 | Campeche                     | MEXICO | 4    |
| <i>Lutzomyia</i> | <i>cruciata</i>    | El Lechugal   | -90.6794430000 | 18.6510680000 | Campeche                     | MEXICO | 4    |
| <i>Lutzomyia</i> | <i>shannoni</i>    | El Limon      | -94.4138888889 | 17.9627777777 | Veracruz Ignacio de la Llave | MEXICO | 38   |
| <i>Lutzomyia</i> | <i>cratifer</i>    | El Limon      | -94.4138888889 | 17.9627777777 | Veracruz Ignacio de la Llave | MEXICO | 51   |
| <i>Lutzomyia</i> | <i>shannoni</i>    | El Nigromante | -95.7572200000 | 17.7647200000 | Veracruz Ignacio de la Llave | MEXICO | 50   |
| <i>Lutzomyia</i> | <i>undulata</i>    | El Nigromante | -95.7572200000 | 17.7647200000 | Veracruz Ignacio de la Llave | MEXICO | 50   |
| <i>Lutzomyia</i> | <i>serrana</i>     | El Nigromante | -95.7572200000 | 17.7647200000 | Veracruz Ignacio de la Llave | MEXICO | 38   |
| <i>Lutzomyia</i> | <i>ovallesi</i>    | Palenque      | -93.8419444444 | 16.6313888889 | Chiapas                      | MEXICO | 32   |
| <i>Lutzomyia</i> | <i>longipalpis</i> | Palenque      | -93.8419444444 | 16.6313888889 | Chiapas                      | MEXICO | 40   |

|                  |                    |                |                |               |                              |        |      |
|------------------|--------------------|----------------|----------------|---------------|------------------------------|--------|------|
| <i>Lutzomyia</i> | <i>olmeca</i>      | Palenque       | -93.8419444444 | 16.6313888889 | Chiapas                      | MEXICO | 40   |
| <i>Lutzomyia</i> | <i>panamensis</i>  | Palenque       | -93.8419444444 | 16.6313888889 | Chiapas                      | MEXICO | 40   |
| <i>Lutzomyia</i> | <i>shannoni</i>    | Palenque       | -93.8419444444 | 16.6313888889 | Chiapas                      | MEXICO | 40   |
| <i>Lutzomyia</i> | <i>ylephiletor</i> | Palenque       | -93.8419444444 | 16.6313888889 | Chiapas                      | MEXICO | 40   |
| <i>Lutzomyia</i> | <i>beltrani</i>    | Palenque       | -93.8419444444 | 16.6313888889 | Chiapas                      | MEXICO | 46   |
| <i>Lutzomyia</i> | <i>permira</i>     | El Palmar      | -96.4405777778 | 19.2834722222 | Veracruz Ignacio de la Llave | MEXICO | 51   |
| <i>Lutzomyia</i> | <i>carpenteri</i>  | El Palmar      | -96.4405777778 | 19.2834722222 | Veracruz Ignacio de la Llave | MEXICO | 51   |
| <i>Lutzomyia</i> | <i>cruciata</i>    | El Pensamiento | -96.6941944411 | 19.8390444411 | Veracruz Ignacio de la Llave | MEXICO | 50   |
| <i>Lutzomyia</i> | <i>shannoni</i>    | El Pital       | -90.7523860000 | 18.5999990000 | Campeche                     | MEXICO | 4    |
| <i>Lutzomyia</i> | <i>panamensis</i>  | El Pital       | -90.7523860000 | 18.5999990000 | Campeche                     | MEXICO | 4    |
| <i>Lutzomyia</i> | <i>cruciata</i>    | El Pital       | -90.7523860000 | 18.5999990000 | Campeche                     | MEXICO | 4    |
| <i>Lutzomyia</i> | <i>cruciata</i>    | El Porvenir    | -94.1944777778 | 16.3694000000 | Oaxaca                       | MEXICO | 38   |
| <i>Lutzomyia</i> | <i>shannoni</i>    | El Rifle       | -90.7333330000 | 18.5638840000 | Campeche                     | MEXICO | 3, 4 |

|                  |                    |              |                 |               |                              |        |      |
|------------------|--------------------|--------------|-----------------|---------------|------------------------------|--------|------|
| <i>Lutzomyia</i> | <i>panamensis</i>  | El Rifle     | -90.7333330000  | 18.5638840000 | Campeche                     | MEXICO | 3, 4 |
| <i>Lutzomyia</i> | <i>cruciata</i>    | El Rifle     | -90.7333330000  | 18.5638840000 | Campeche                     | MEXICO | 3, 4 |
| <i>Lutzomyia</i> | <i>serrana</i>     | El Tacahuite | -96.6594444444  | 19.8233333333 | Veracruz Ignacio de la Llave | MEXICO | 50   |
| <i>Lutzomyia</i> | <i>shannoni</i>    | El Tacahuite | -96.6594444444  | 19.8233333333 | Veracruz Ignacio de la Llave | MEXICO | 38   |
| <i>Lutzomyia</i> | <i>cruciata</i>    | El Tacahuite | -96.6594444444  | 19.8233333333 | Veracruz Ignacio de la Llave | MEXICO | 50   |
| <i>Lutzomyia</i> | <i>cayennensis</i> | El Tepozal   | -105.0661100000 | 21.3872200000 | Nayarit                      | MEXICO | 38   |
| <i>Lutzomyia</i> | <i>ovallesi</i>    | El Tepozal   | -105.0661100000 | 21.3872200000 | Nayarit                      | MEXICO | 38   |
| <i>Lutzomyia</i> | <i>shannoni</i>    | El Tormento  | -90.8095460000  | 18.5999850000 | Campeche                     | MEXICO | 3, 4 |
| <i>Lutzomyia</i> | <i>panamensis</i>  | El Tormento  | -90.8095460000  | 18.5999850000 | Campeche                     | MEXICO | 3, 4 |
| <i>Lutzomyia</i> | <i>cruciata</i>    | El Tormento  | -90.8095460000  | 18.5999850000 | Campeche                     | MEXICO | 3, 4 |
| <i>Lutzomyia</i> | <i>shannoni</i>    | El Trueno    | -90.7872240000  | 18.6510680000 | Campeche                     | MEXICO | 4    |
| <i>Lutzomyia</i> | <i>panamensis</i>  | El Trueno    | -90.7872240000  | 18.6510680000 | Campeche                     | MEXICO | 4    |
| <i>Lutzomyia</i> | <i>cruciata</i>    | El Trueno    | -90.7872240000  | 18.6510680000 | Campeche                     | MEXICO | 4    |

|                  |                     |                 |                 |               |                              |           |        |
|------------------|---------------------|-----------------|-----------------|---------------|------------------------------|-----------|--------|
| <i>Lutzomyia</i> | <i>serrana</i>      | El Zapotal      | -96.6744444444  | 19.9550000000 | Veracruz Ignacio de la Llave | MEXICO    | 50     |
| <i>Lutzomyia</i> | <i>shannoni</i>     | El Zapotal      | -96.6744444444  | 19.9550000000 | Veracruz Ignacio de la Llave | MEXICO    | 50     |
| <i>Lutzomyia</i> | <i>cruciata</i>     | El Zapotal      | -96.6744444444  | 19.9550000000 | Veracruz Ignacio de la Llave | MEXICO    | 50     |
| <i>Lutzomyia</i> | <i>chiapanensis</i> | El Zapote       | -96.1233333333  | 18.7683333333 | Veracruz Ignacio de la Llave | MEXICO    | 38     |
| <i>Lutzomyia</i> | <i>texana</i>       | El Zopilote     | -104.9511027777 | 21.9671194444 | Nayarit                      | MEXICO    | 47, 93 |
| <i>Lutzomyia</i> | <i>shannoni</i>     | El Zopilote     | -104.9511027777 | 21.9671194444 | Nayarit                      | MEXICO    | 47, 93 |
| <i>Lutzomyia</i> | <i>serrana</i>      | El Zopilote     | -104.9511027777 | 21.9671194444 | Nayarit                      | MEXICO    | 38     |
| <i>Lutzomyia</i> | <i>cayennensis</i>  | El Zopilote     | -104.9511027777 | 21.9671194444 | Nayarit                      | MEXICO    | 38, 93 |
| <i>Lutzomyia</i> | <i>cruciata</i>     | El Zopilote     | -104.9511027777 | 21.9671194444 | Nayarit                      | MEXICO    | 43, 93 |
| <i>Lutzomyia</i> | <i>shannoni</i>     | Emiliano Zapata | -94.3686111111  | 17.9527777778 | Veracruz Ignacio de la Llave | MEXICO    | 38     |
| <i>Lutzomyia</i> | <i>olmeca</i>       | Emiliano Zapata | -94.3686111111  | 17.9527777778 | Veracruz Ignacio de la Llave | MEXICO    | 47     |
| <i>Lutzomyia</i> | <i>cayennensis</i>  | Escuintla       | -92.6576333333  | 16.3221361110 | Chiapas                      | MEXICO    | 98     |
| <i>Lutzomyia</i> | <i>undulata</i>     | Escuintla       | -90.7869444444  | 14.2977194444 | Escuintla                    | GUATEMALA | 29     |

|                    |                      |                          |                |               |                              |        |         |
|--------------------|----------------------|--------------------------|----------------|---------------|------------------------------|--------|---------|
| <i>Brumptomyia</i> | <i>mesai</i>         | Esperanza                | -89.1563889000 | 16.8936111000 | Distrito el Cayo             | BELIZE | 57      |
| <i>Lutzomyia</i>   | <i>permira</i>       | Esperanza                | -89.1563889000 | 16.8936111000 | Distrito el Cayo             | BELIZE | 57      |
| <i>Lutzomyia</i>   | <i>cayennensis</i>   | Esperanza                | -89.1563889000 | 16.8936111000 | Distrito el Cayo             | BELIZE | 57      |
| <i>Lutzomyia</i>   | <i>trinidadensis</i> | Esperanza                | -89.1563889000 | 16.8936111000 | Distrito el Cayo             | BELIZE | 57      |
| <i>Lutzomyia</i>   | <i>beltrani</i>      | Esperanza                | -89.1563889000 | 16.8936111000 | Distrito el Cayo             | BELIZE | 57      |
| <i>Lutzomyia</i>   | <i>shannoni</i>      | Esperanza                | -89.1563889000 | 16.8936111000 | Distrito el Cayo             | BELIZE | 57      |
| <i>Lutzomyia</i>   | <i>undulata</i>      | Esperanza                | -89.1563889000 | 16.8936111000 | Distrito el Cayo             | BELIZE | 57      |
| <i>Lutzomyia</i>   | <i>carpenteri</i>    | Esperanza                | -89.1563889000 | 16.8936111000 | Distrito el Cayo             | BELIZE | 99, 100 |
| <i>Lutzomyia</i>   | <i>cruciata</i>      | Esperanza                | -89.1563889000 | 16.8936111000 | Distrito el Cayo             | BELIZE | 57      |
| <i>Lutzomyia</i>   | <i>chiapanensis</i>  | Espinal de Santa Barbara | -96.4197222222 | 19.1280555556 | Veracruz Ignacio de la Llave | MEXICO | 38      |
| <i>Lutzomyia</i>   | <i>shannoni</i>      | Estancia de Morelos      | -95.8911111111 | 17.0519444444 | Oaxaca                       | MEXICO | 38      |
| <i>Lutzomyia</i>   | <i>cruciata</i>      | Estancia de Morelos      | -95.8911111111 | 17.0519444444 | Oaxaca                       | MEXICO | 38      |
| <i>Lutzomyia</i>   | <i>shannoni</i>      | Everglades National Park | -91.8318333333 | 35.2026138889 | Arkansas                     | USA    | 105     |

|                  |                      |                        |                 |               |                              |        |        |
|------------------|----------------------|------------------------|-----------------|---------------|------------------------------|--------|--------|
| <i>Lutzomyia</i> | <i>vexator</i>       | Fairfax                | -122.5888694444 | 37.9870277778 | California                   | USA    | 8      |
| <i>Lutzomyia</i> | <i>chiapanensis</i>  | Farallon               | -96.4102777778  | 19.6375000000 | Veracruz Ignacio de la Llave | MEXICO | 51     |
| <i>Lutzomyia</i> | <i>shannoni</i>      | Fayette Site1          | -84.4801361111  | 38.0960361111 | Kentucky                     | USA    | 67     |
| <i>Lutzomyia</i> | <i>shannoni</i>      | Fayette Site 2         | -84.4802611111  | 37.9544458333 | Ohio                         | USA    | 67     |
| <i>Lutzomyia</i> | <i>deleoni</i>       | Felipe Carrillo Puerto | -88.0454055556  | 19.5775594444 | Quintana Roo                 | MEXICO | 21, 45 |
| <i>Lutzomyia</i> | <i>shannoni</i>      | Felipe Carrillo Puerto | -88.0454055556  | 19.5775594444 | Quintana Roo                 | MEXICO | 20, 47 |
| <i>Lutzomyia</i> | <i>trinidadensis</i> | Felipe Carrillo Puerto | -88.0454055556  | 19.5775594444 | Quintana Roo                 | MEXICO | 38     |
| <i>Lutzomyia</i> | <i>cratifer</i>      | Felipe Carrillo Puerto | -88.0454055556  | 19.5775594444 | Quintana Roo                 | MEXICO | 21     |
| <i>Lutzomyia</i> | <i>longipalpis</i>   | Felipe Carrillo Puerto | -88.0454055556  | 19.5775594444 | Quintana Roo                 | MEXICO | 20     |
| <i>Lutzomyia</i> | <i>olmeca</i>        | Felipe Carrillo Puerto | -88.0454055556  | 19.5775594444 | Quintana Roo                 | MEXICO | 5, 21  |
| <i>Lutzomyia</i> | <i>ovallesi</i>      | Felipe Carrillo Puerto | -88.0454055556  | 19.5775594444 | Quintana Roo                 | MEXICO | 5      |
| <i>Lutzomyia</i> | <i>panamensis</i>    | Felipe Carrillo Puerto | -88.0454055556  | 19.5775594444 | Quintana Roo                 | MEXICO | 5      |
| <i>Lutzomyia</i> | <i>cruciata</i>      | Felipe Carrillo Puerto | -88.0454055556  | 19.5775594444 | Quintana Roo                 | MEXICO | 43     |

|                  |                    |                      |                 |               |               |           |         |
|------------------|--------------------|----------------------|-----------------|---------------|---------------|-----------|---------|
| <i>Lutzomyia</i> | <i>vexator</i>     | Fillmore             | -118.9181527778 | 34.3990888889 | California    | USA       | 8, 31   |
| <i>Lutzomyia</i> | <i>carpenteri</i>  | Finca Argovia        | -92.2947777778  | 15.1246388889 | Chiapas       | MEXICO    | 66      |
| <i>Lutzomyia</i> | <i>texana</i>      | Finca Argovia        | -92.2947777778  | 15.1246388889 | Chiapas       | MEXICO    | 66      |
| <i>Lutzomyia</i> | <i>cruciata</i>    | Finca Argovia        | -92.2947777778  | 15.1246388889 | Chiapas       | MEXICO    | 66      |
| <i>Lutzomyia</i> | <i>cruciata</i>    | Finca Zapote         | -90.5666666667  | 14.4166666667 | Escuintla     | GUATEMALA | 105     |
| <i>Lutzomyia</i> | <i>carpenteri</i>  | Finca Guadalupe Saju | -92.2858333333  | 15.1569444444 | Chiapas       | MEXICO    | 66      |
| <i>Lutzomyia</i> | <i>shannoni</i>    | Finca Guadalupe Saju | -92.2858333333  | 15.1569444444 | Chiapas       | MEXICO    | 66      |
| <i>Lutzomyia</i> | <i>ovallesi</i>    | Finca Guadalupe Saju | -92.2858333333  | 15.1569444444 | Chiapas       | MEXICO    | 66      |
| <i>Lutzomyia</i> | <i>cruciata</i>    | Finca Guadalupe Saju | -92.2858333333  | 15.1569444444 | Chiapas       | MEXICO    | 66, 105 |
| <i>Lutzomyia</i> | <i>cruciata</i>    | Finca La Chiripa     | -92.3063888889  | 15.1580555556 | Chiapas       | MEXICO    | 43      |
| <i>Lutzomyia</i> | <i>longipalpis</i> | Finca Los Horcones   | -93.6055555556  | 15.9555555556 | Chiapas       | MEXICO    | 43      |
| <i>Lutzomyia</i> | <i>cruciata</i>    | Finca San Basilio    | -91.3167000000  | 14.4667000000 | Suchitepequez | GUATEMALA | 105     |
| <i>Lutzomyia</i> | <i>shannoni</i>    | Fork State Park      | -84.1857111111  | 39.0928444444 | Ohio          | USA       | 67      |

|                  |                    |                     |                 |               |                |     |                    |
|------------------|--------------------|---------------------|-----------------|---------------|----------------|-----|--------------------|
| <i>Lutzomyia</i> | <i>shannoni</i>    | Fort Bragg          | -78.9991666666  | 35.1391666667 | North Caroline | USA | 10, 34, 105        |
| <i>Lutzomyia</i> | <i>vexator</i>     | Fort Bragg          | -78.9991666666  | 35.1391666667 | North Caroline | USA | 10, 34             |
| <i>Lutzomyia</i> | <i>shannoni</i>    | Fort Campbell       | -87.4667333333  | 36.6499638889 | Kentucky       | USA | 10, 11, 34, 35, 67 |
| <i>Lutzomyia</i> | <i>vexator</i>     | Fort Campbell       | -87.4667333333  | 36.6499638889 | Kentucky       | USA | 10, 34, 67         |
| <i>Lutzomyia</i> | <i>shannoni</i>    | Fort Hood           | -97.7800000000  | 31.1297444444 | Texas          | USA | 10                 |
| <i>Lutzomyia</i> | <i>vexator</i>     | Fort Hood           | -97.7800000000  | 31.1297444444 | Texas          | USA | 10                 |
| <i>Lutzomyia</i> | <i>diabolica</i>   | Fort Hood           | -97.7800000000  | 31.1297444444 | Texas          | USA | 10                 |
| <i>Lutzomyia</i> | <i>anthophora</i>  | Fort Hood           | -97.7800000000  | 31.1297444444 | Texas          | USA | 10                 |
| <i>Lutzomyia</i> | <i>stewarti</i>    | Fort Hunter Liggett | -121.2489750000 | 35.9767805556 | California     | USA | 105                |
| <i>Lutzomyia</i> | <i>shannoni</i>    | Fort Johnson        | -81.1637250000  | 33.8313138889 | South Caroline | USA | 105                |
| <i>Lutzomyia</i> | <i>shannoni</i>    | Fort McCoy          | -81.9670083333  | 29.3649416667 | Florida        | USA | 104, 105           |
| <i>Lutzomyia</i> | <i>shannoni</i>    | Fort Rucker         | -85.7151416667  | 31.3433500000 | Alabama        | USA | 34, 35, 105        |
| <i>Lutzomyia</i> | <i>californica</i> | Fort Yuma           | -114.6192027778 | 32.6957055556 | California     | USA | 8, 105             |

|                    |                    |                     |                |               |              |        |    |
|--------------------|--------------------|---------------------|----------------|---------------|--------------|--------|----|
| <i>Lutzomyia</i>   | <i>carpenteri</i>  | Francisco I. Madero | -88.0419053624 | 20.2158719746 | Quintana Roo | MEXICO | 58 |
| <i>Lutzomyia</i>   | <i>cayennensis</i> | Francisco I. Madero | -88.0419053624 | 20.2158719746 | Quintana Roo | MEXICO | 58 |
| <i>Lutzomyia</i>   | <i>deleoni</i>     | Francisco I. Madero | -88.0419053624 | 20.2158719746 | Quintana Roo | MEXICO | 58 |
| <i>Brumptomyia</i> | <i>mesai</i>       | Francisco I. Madero | -88.0419053624 | 20.2158719746 | Quintana Roo | MEXICO | 58 |
| <i>Brumptomyia</i> | <i>hamata</i>      | Francisco I. Madero | -88.0419053624 | 20.2158719746 | Quintana Roo | MEXICO | 58 |
| <i>Lutzomyia</i>   | <i>longipalpis</i> | Francisco I. Madero | -88.0419053624 | 20.2158719746 | Quintana Roo | MEXICO | 58 |
| <i>Lutzomyia</i>   | <i>shannoni</i>    | Francisco I. Madero | -88.0419053624 | 20.2158719746 | Quintana Roo | MEXICO | 58 |
| <i>Lutzomyia</i>   | <i>steatopyga</i>  | Francisco I. Madero | -88.0419053624 | 20.2158719746 | Quintana Roo | MEXICO | 58 |
| <i>Lutzomyia</i>   | <i>undulata</i>    | Francisco I. Madero | -88.0419053624 | 20.2158719746 | Quintana Roo | MEXICO | 58 |
| <i>Lutzomyia</i>   | <i>cratifer</i>    | Francisco I. Madero | -88.0419053624 | 20.2158719746 | Quintana Roo | MEXICO | 58 |
| <i>Lutzomyia</i>   | <i>olmeca</i>      | Francisco I. Madero | -88.0419053624 | 20.2158719746 | Quintana Roo | MEXICO | 58 |
| <i>Lutzomyia</i>   | <i>carpenteri</i>  | Francisco I. Madero | -88.0478438134 | 20.1606488075 | Quintana Roo | MEXICO | 58 |
| <i>Lutzomyia</i>   | <i>longipalpis</i> | Francisco I. Madero | -88.0478438134 | 20.1606488075 | Quintana Roo | MEXICO | 58 |

|                    |                    |                     |                 |               |              |        |          |
|--------------------|--------------------|---------------------|-----------------|---------------|--------------|--------|----------|
| <i>Lutzomyia</i>   | <i>cayennensis</i> | Francisco I. Madero | -88.0478438134  | 20.1606488075 | Quintana Roo | MEXICO | 58       |
| <i>Lutzomyia</i>   | <i>cratifer</i>    | Francisco I. Madero | -88.0478438134  | 20.1606488075 | Quintana Roo | MEXICO | 58       |
| <i>Lutzomyia</i>   | <i>deleoni</i>     | Francisco I. Madero | -88.0478438134  | 20.1606488075 | Quintana Roo | MEXICO | 58       |
| <i>Brumptomyia</i> | <i>mesai</i>       | Francisco I. Madero | -88.0478438134  | 20.1606488075 | Quintana Roo | MEXICO | 58       |
| <i>Lutzomyia</i>   | <i>shannoni</i>    | Francisco I. Madero | -88.0478438134  | 20.1606488075 | Quintana Roo | MEXICO | 58       |
| <i>Lutzomyia</i>   | <i>steatopyga</i>  | Francisco I. Madero | -88.0478438134  | 20.1606488075 | Quintana Roo | MEXICO | 58       |
| <i>Lutzomyia</i>   | <i>undulata</i>    | Francisco I. Madero | -88.0478438134  | 20.1606488075 | Quintana Roo | MEXICO | 58       |
| <i>Lutzomyia</i>   | <i>olmeca</i>      | Francisco I. Madero | -93.1589166667  | 18.1748055556 | Tabasco      | MEXICO | 64       |
| <i>Lutzomyia</i>   | <i>cruciata</i>    | Francisco I. Madero | -88.0419053624  | 20.2158719746 | Quintana Roo | MEXICO | 58       |
| <i>Lutzomyia</i>   | <i>cruciata</i>    | Francisco I. Madero | -88.0478438134  | 20.1606488075 | Quintana Roo | MEXICO | 58       |
| <i>Lutzomyia</i>   | <i>diabolica</i>   | Fredericksburg      | -98.8719833330  | 30.2697611111 | Texas        | USA    | 104, 105 |
| <i>Lutzomyia</i>   | <i>texana</i>      | Fredericksburg      | -98.8719833330  | 30.2697611111 | Texas        | USA    | 104, 105 |
| <i>Lutzomyia</i>   | <i>anthophora</i>  | Fresno Wash         | -109.8275833333 | 32.8962000000 | Arizona      | USA    | 60       |

|                  |                    |                |                 |               |             |        |              |
|------------------|--------------------|----------------|-----------------|---------------|-------------|--------|--------------|
| <i>Lutzomyia</i> | <i>californica</i> | Fresno Wash    | -109.8275833333 | 32.8962000000 | Arizona     | USA    | 60           |
| <i>Lutzomyia</i> | <i>shannoni</i>    | Gainsville     | -82.3248500000  | 29.6516333333 | Florida     | USA    | 27           |
| <i>Lutzomyia</i> | <i>diabolica</i>   | Gainsville     | -82.3248500000  | 29.6516333333 | Florida     | USA    | 52           |
| <i>Lutzomyia</i> | <i>cruciata</i>    | Gainsville     | -82.3248500000  | 29.6516333333 | Florida     | USA    | 27, 104, 105 |
| <i>Lutzomyia</i> | <i>longipalpis</i> | Galecio Narcia | -93.0187333333  | 16.5698333333 | Chiapas     | MEXICO | 49           |
| <i>Lutzomyia</i> | <i>cruciata</i>    | Galecio Narcia | -93.0187333333  | 16.5698333333 | Chiapas     | MEXICO | 49           |
| <i>Lutzomyia</i> | <i>panamensis</i>  | Gallo Jug      | -89.0518055556  | 17.5601017778 | Orange Walk | BELIZE | 57           |
| <i>Lutzomyia</i> | <i>bispinosa</i>   | Gallo Jug      | -89.0518055556  | 17.5601017778 | Orange Walk | BELIZE | 57           |
| <i>Lutzomyia</i> | <i>deleoni</i>     | Gallo Jug      | -89.0518055556  | 17.5601017778 | Orange Walk | BELIZE | 57           |
| <i>Lutzomyia</i> | <i>olmeca</i>      | Gallo Jug      | -89.0518055556  | 17.5601017778 | Orange Walk | BELIZE | 57           |
| <i>Lutzomyia</i> | <i>shannoni</i>    | Gallo Jug      | -89.0518055556  | 17.5601017778 | Orange Walk | BELIZE | 57           |
| <i>Lutzomyia</i> | <i>ovallesi</i>    | Gallo Jug      | -89.0518055556  | 17.5601017778 | Orange Walk | BELIZE | 57           |
| <i>Lutzomyia</i> | <i>cruciata</i>    | Gallo Jug      | -89.0518055556  | 17.5601017778 | Orange Walk | BELIZE | 57           |

|                  |                    |                             |                 |               |            |        |          |
|------------------|--------------------|-----------------------------|-----------------|---------------|------------|--------|----------|
| <i>Lutzomyia</i> | <i>anthophora</i>  | Garcia                      | -100.5975777778 | 25.8089083333 | Nuevo Leon | MEXICO | 105      |
| <i>Lutzomyia</i> | <i>diabolica</i>   | Garner State Park           | -99.7861666667  | 29.2097111111 | Texas      | USA    | 104, 105 |
| <i>Lutzomyia</i> | <i>texana</i>      | Garner State Park           | -99.7861666667  | 29.2097111111 | Texas      | USA    | 104, 105 |
| <i>Lutzomyia</i> | <i>shannoni</i>    | Garner State Park           | -99.7861666667  | 29.2097111111 | Texas      | USA    | 52       |
| <i>Lutzomyia</i> | <i>cruciata</i>    | General Lazaro Cardenas     | -95.8925000000  | 17.8402777778 | Oaxaca     | MEXICO | 40       |
| <i>Lutzomyia</i> | <i>shannoni</i>    | Gral. Manuel Castilla Brito | -89.4315111111  | 18.4503500000 | Campeche   | MEXICO | 78       |
| <i>Lutzomyia</i> | <i>cruciata</i>    | Gral. Manuel Castilla Brito | -89.4315111111  | 18.4503500000 | Campeche   | MEXICO | 78       |
| <i>Lutzomyia</i> | <i>longipalpis</i> | Granjas Merida              | -99.0569444444  | 18.8641666667 | Morelos    | MEXICO | 20, 71   |
| <i>Lutzomyia</i> | <i>anthophora</i>  | Granjas Merida              | -99.0569444444  | 18.8641666667 | Morelos    | MEXICO | 71       |
| <i>Lutzomyia</i> | <i>cayennensis</i> | Granjas Merida              | -99.0569444444  | 18.8641666667 | Morelos    | MEXICO | 71       |
| <i>Lutzomyia</i> | <i>diabolica</i>   | Granjas Merida              | -99.0569444444  | 18.8641666667 | Morelos    | MEXICO | 71       |
| <i>Lutzomyia</i> | <i>dodgei</i>      | Granjas Merida              | -99.0569444444  | 18.8641666667 | Morelos    | MEXICO | 71       |
| <i>Lutzomyia</i> | <i>texana</i>      | Granjas Merida              | -99.0569444444  | 18.8641666667 | Morelos    | MEXICO | 71       |

|                    |                      |                                     |                |               |                  |        |        |
|--------------------|----------------------|-------------------------------------|----------------|---------------|------------------|--------|--------|
| <i>Lutzomyia</i>   | <i>trinidadensis</i> | Granjas Merida                      | -99.0569444444 | 18.8641666667 | Morelos          | MEXICO | 71     |
| <i>Lutzomyia</i>   | <i>shannoni</i>      | Great Smoky Mountains National Park | -83.5345580556 | 35.6918444444 | Tennessee        | USA    | 41     |
| <i>Lutzomyia</i>   | <i>bispinosa</i>     | Guacamallo                          | -89.0332805556 | 16.8665388889 | Distrito el Cayo | BELIZE | 53     |
| <i>Lutzomyia</i>   | <i>panamensis</i>    | Guacamallo                          | -89.0332805556 | 16.8665388889 | Distrito el Cayo | BELIZE | 53     |
| <i>Lutzomyia</i>   | <i>ylephiletor</i>   | Guacamallo                          | -89.0332805556 | 16.8665388889 | Distrito el Cayo | BELIZE | 53     |
| <i>Brumptomyia</i> | <i>hamata</i>        | Guacamallo                          | -89.0332805556 | 16.8665388889 | Distrito el Cayo | BELIZE | 53     |
| <i>Lutzomyia</i>   | <i>trinidadensis</i> | Guacamallo                          | -89.0332805556 | 16.8665388889 | Distrito el Cayo | BELIZE | 53     |
| <i>Lutzomyia</i>   | <i>shannoni</i>      | Guacamallo                          | -89.0332805556 | 16.8665388889 | Distrito el Cayo | BELIZE | 53     |
| <i>Lutzomyia</i>   | <i>ovallesi</i>      | Guacamallo                          | -89.0332805556 | 16.8665388889 | Distrito el Cayo | BELIZE | 53     |
| <i>Brumptomyia</i> | <i>mesai</i>         | Guacamallo                          | -89.0332805556 | 16.8665388889 | Distrito el Cayo | BELIZE | 57, 99 |
| <i>Lutzomyia</i>   | <i>deleoni</i>       | Guacamallo                          | -89.0332805556 | 16.8665388889 | Distrito el Cayo | BELIZE | 103    |
| <i>Lutzomyia</i>   | <i>beltrani</i>      | Guacamallo                          | -89.0332805556 | 16.8665388889 | Distrito el Cayo | BELIZE | 103    |
| <i>Lutzomyia</i>   | <i>cruciata</i>      | Guacamallo                          | -89.0332805556 | 16.8665388889 | Distrito el Cayo | BELIZE | 53     |

|                  |                      |                     |                 |               |             |           |          |
|------------------|----------------------|---------------------|-----------------|---------------|-------------|-----------|----------|
| <i>Lutzomyia</i> | <i>cruciata</i>      | Guadalupe Miramar   | -91.2078888889  | 16.1980555556 | Chiapas     | MEXICO    | 74       |
| <i>Lutzomyia</i> | <i>shannoni</i>      | Guadalupe Victoria  | -95.8888888889  | 16.0160000000 | Oaxaca      | MEXICO    | 38       |
| <i>Lutzomyia</i> | <i>cruciata</i>      | Guadalupe Victoria  | -95.8888888889  | 16.0160000000 | Oaxaca      | MEXICO    | 38       |
| <i>Lutzomyia</i> | <i>longipalpis</i>   | Guastatoya          | -90.0666666667  | 14.8500138889 | El Progreso | GUATEMALA | 57       |
| <i>Lutzomyia</i> | <i>panamensis</i>    | Guatemala           | -90.5352777778  | 14.6134472222 |             | GUATEMALA | 48       |
| <i>Lutzomyia</i> | <i>trinidadensis</i> | Guatemala           | -90.5352777778  | 14.6134472222 | Guatemala   | GUATEMALA | 48       |
| <i>Lutzomyia</i> | <i>serrana</i>       | Guatemala           | -90.5352777778  | 14.6134472222 | Guatemala   | GUATEMALA | 44       |
| <i>Lutzomyia</i> | <i>shannoni</i>      | Gulf Hammock        | -82.7309444444  | 29.2530083333 | Florida     | USA       | 104, 105 |
| <i>Lutzomyia</i> | <i>vexator</i>       | Gulf Hammock        | -82.7309444444  | 29.2530083333 | Florida     | USA       | 27       |
| <i>Lutzomyia</i> | <i>diabolica</i>     | Gulf Hammock        | -82.7309444444  | 29.2530083333 | Florida     | USA       | 52       |
| <i>Lutzomyia</i> | <i>stewarti</i>      | Hasting Reservation | -121.8946750000 | 36.6001888889 | California  | USA       | 8        |
| <i>Lutzomyia</i> | <i>vexator</i>       | Hasting Reservation | -121.8946750000 | 36.6001888889 | California  | USA       | 8        |
| <i>Lutzomyia</i> | <i>chiapanensis</i>  | Hermosillo          | -110.9613083333 | 29.0890694444 | Sonora      | MEXICO    | 38       |

|                    |                      |                    |                 |               |             |        |     |
|--------------------|----------------------|--------------------|-----------------|---------------|-------------|--------|-----|
| <i>Lutzomyia</i>   | <i>stewarti</i>      | Hermosillo         | -110.9613083333 | 29.0890694444 | Sonora      | MEXICO | 48  |
| <i>Lutzomyia</i>   | <i>vexator</i>       | Hermosillo         | -110.9613083333 | 29.0890694444 | Sonora      | MEXICO | 48  |
| <i>Lutzomyia</i>   | <i>diabolica</i>     | Hidalgo del Parral | -105.6668333333 | 26.9323166660 | Chihuahua   | MEXICO | 105 |
| <i>Lutzomyia</i>   | <i>shannoni</i>      | Hinds              | -90.3748361111  | 32.2652388889 | Mississippi | USA    | 39  |
| <i>Brumptomyia</i> | <i>hamata</i>        | Hobonil            | -89.0416670000  | 20.0016670000 | Yucatan     | MEXICO | 69  |
| <i>Lutzomyia</i>   | <i>beltrani</i>      | Hobonil            | -89.0416670000  | 20.0016670000 | Yucatan     | MEXICO | 69  |
| <i>Lutzomyia</i>   | <i>cayennensis</i>   | Hobonil            | -89.0416670000  | 20.0016670000 | Yucatan     | MEXICO | 69  |
| <i>Lutzomyia</i>   | <i>cratifer</i>      | Hobonil            | -89.0416670000  | 20.0016670000 | Yucatan     | MEXICO | 69  |
| <i>Lutzomyia</i>   | <i>deleoni</i>       | Hobonil            | -89.0416670000  | 20.0016670000 | Yucatan     | MEXICO | 69  |
| <i>Lutzomyia</i>   | <i>serrana</i>       | Hobonil            | -89.0416670000  | 20.0016670000 | Yucatan     | MEXICO | 69  |
| <i>Lutzomyia</i>   | <i>trinidadensis</i> | Hobonil            | -89.0416670000  | 20.0016670000 | Yucatan     | MEXICO | 69  |
| <i>Lutzomyia</i>   | <i>shannoni</i>      | Honey Island Woods | -89.9253222222  | 30.4357416667 | Louisiana   | USA    | 87  |
| <i>Lutzomyia</i>   | <i>vexator</i>       | Hooper             | -122.1616722222 | 41.2679333333 | California  | USA    | 31  |

|                  |                      |              |                 |               |                     |        |        |
|------------------|----------------------|--------------|-----------------|---------------|---------------------|--------|--------|
| <i>Lutzomyia</i> | <i>shannoni</i>      | Hot Springs  | -88.2022888889  | 30.7629000000 | Alabama             | USA    | 105    |
| <i>Lutzomyia</i> | <i>diabolica</i>     | Huetamo      | -100.9066305556 | 18.6329722222 | Michoacan de Ocampo | MEXICO | 43     |
| <i>Lutzomyia</i> | <i>longipalpis</i>   | Huetamo      | -100.9066305556 | 18.6329722222 | Michoacan de Ocampo | MEXICO | 43     |
| <i>Lutzomyia</i> | <i>cayennensis</i>   | Huetamo      | -100.9066305556 | 18.6329722222 | Michoacan de Ocampo | MEXICO | 38     |
| <i>Lutzomyia</i> | <i>cruciata</i>      | Huetamo      | -100.9066305556 | 18.6329722222 | Michoacan de Ocampo | MEXICO | 38     |
| <i>Lutzomyia</i> | <i>olmeca</i>        | Huimanguillo | -93.3913888889  | 17.8302777778 | Tabasco             | MEXICO | 40     |
| <i>Lutzomyia</i> | <i>longipalpis</i>   | Huitzuco     | -99.3317400000  | 18.3012900000 | Guerrero            | MEXICO | 20, 71 |
| <i>Lutzomyia</i> | <i>cayennensis</i>   | Huitzuco     | -99.3317400000  | 18.3012900000 | Guerrero            | MEXICO | 71     |
| <i>Lutzomyia</i> | <i>diabolica</i>     | Huitzuco     | -99.3317400000  | 18.3012900000 | Guerrero            | MEXICO | 71     |
| <i>Lutzomyia</i> | <i>dodgei</i>        | Huitzuco     | -99.3317400000  | 18.3012900000 | Guerrero            | MEXICO | 71     |
| <i>Lutzomyia</i> | <i>texana</i>        | Huitzuco     | -99.3317400000  | 18.3012900000 | Guerrero            | MEXICO | 71     |
| <i>Lutzomyia</i> | <i>trinidadensis</i> | Huitzuco     | -99.3317400000  | 18.3012900000 | Guerrero            | MEXICO | 71     |
| <i>Lutzomyia</i> | <i>cruciata</i>      | Huitzuco     | -99.3317400000  | 18.3012900000 | Guerrero            | MEXICO | 40     |

|                    |                      |                            |                |               |                  |        |            |
|--------------------|----------------------|----------------------------|----------------|---------------|------------------|--------|------------|
| <i>Brumptomyia</i> | <i>mesai</i>         | Humminbird Highway         | -88.7131555556 | 17.1520944444 | Distrito el Cayo | BELIZE | 57         |
| <i>Lutzomyia</i>   | <i>panamensis</i>    | Humminbird Highway         | -88.7131555556 | 17.1520944444 | Distrito el Cayo | BELIZE | 57         |
| <i>Lutzomyia</i>   | <i>cayennensis</i>   | Humminbird Highway         | -88.7131555556 | 17.1520944444 | Distrito el Cayo | BELIZE | 57         |
| <i>Lutzomyia</i>   | <i>trinidadensis</i> | Humminbird Highway         | -88.7131555556 | 17.1520944444 | Distrito el Cayo | BELIZE | 57         |
| <i>Lutzomyia</i>   | <i>deleoni</i>       | Humminbird Highway         | -88.7131555556 | 17.1520944444 | Distrito el Cayo | BELIZE | 57         |
| <i>Lutzomyia</i>   | <i>olmeca</i>        | Humminbird Highway         | -88.7131555556 | 17.1520944444 | Distrito el Cayo | BELIZE | 57         |
| <i>Lutzomyia</i>   | <i>ovallesi</i>      | Humminbird Highway         | -88.7131555556 | 17.1520944444 | Distrito el Cayo | BELIZE | 57         |
| <i>Lutzomyia</i>   | <i>cruciata</i>      | Humminbird Highway         | -88.7131555556 | 17.1520944444 | Distrito el Cayo | BELIZE | 57         |
| <i>Lutzomyia</i>   | <i>cayennensis</i>   | Iguala de la Independencia | -99.5333333333 | 18.3558388883 | Guerrero         | MEXICO | 95         |
| <i>Lutzomyia</i>   | <i>dodgei</i>        | Iguala de la Independencia | -99.5333333333 | 18.3558388883 | Guerrero         | MEXICO | 45, 96, 97 |
| <i>Lutzomyia</i>   | <i>texana</i>        | Iguala de la Independencia | -99.5333333333 | 18.3558388883 | Guerrero         | MEXICO | 105        |
| <i>Brumptomyia</i> | <i>mesai</i>         | Iguana Creek               | -89.0000000000 | 17.3333805555 | Distrito el Cayo | BELIZE | 57, 99     |
| <i>Lutzomyia</i>   | <i>permira</i>       | Iguana Creek               | -89.0000000000 | 17.3333805555 | Distrito el Cayo | BELIZE | 57, 99     |

|                  |                      |                                |                 |               |                      |        |        |
|------------------|----------------------|--------------------------------|-----------------|---------------|----------------------|--------|--------|
| <i>Lutzomyia</i> | <i>cayennensis</i>   | Iguana Creek                   | -89.0000000000  | 17.3333805555 | Distrito el Cayo     | BELIZE | 57, 99 |
| <i>Lutzomyia</i> | <i>trinidadensis</i> | Iguana Creek                   | -89.0000000000  | 17.3333805555 | Distrito el Cayo     | BELIZE | 57, 99 |
| <i>Lutzomyia</i> | <i>cruciata</i>      | Iguana Creek                   | -89.0000000000  | 17.3333805555 | Distrito el Cayo     | BELIZE | 57, 99 |
| <i>Lutzomyia</i> | <i>vexator</i>       | Institute of Ecosystem Studies | -73.6940444444  | 41.7850722222 | New York             | USA    | 72     |
| <i>Lutzomyia</i> | <i>carpenteri</i>    | Ixil                           | -89.4816611111  | 21.1509583333 | Yucatan              | MEXICO | 84     |
| <i>Lutzomyia</i> | <i>cayennensis</i>   | Ixil                           | -89.4816611111  | 21.1509583333 | Yucatan              | MEXICO | 84     |
| <i>Lutzomyia</i> | <i>cruciata</i>      | Ixil                           | -89.4816611111  | 21.1509583333 | Yucatan              | MEXICO | 84     |
| <i>Lutzomyia</i> | <i>longipalpis</i>   | Ixtapa                         | -101.5511111111 | 17.6411111111 | Guerrero             | MEXICO | 43     |
| <i>Lutzomyia</i> | <i>cruciata</i>      | Ixtapa                         | -101.5511111111 | 17.6411111111 | Guerrero             | MEXICO | 43     |
| <i>Lutzomyia</i> | <i>shannoni</i>      | Jacksonville                   | -77.4302416667  | 34.7540527778 | North Caroline       | USA    | 105    |
| <i>Lutzomyia</i> | <i>olmeca</i>        | Jalpa de Mendez                | -93.0625000000  | 18.1763888889 | Tabasco              | MEXICO | 40     |
| <i>Lutzomyia</i> | <i>texana</i>        | Jimenez                        | -100.6771861111 | 29.0693555556 | Coahuila de Zaragoza | MEXICO | 38     |
| <i>Lutzomyia</i> | <i>deleoni</i>       | Jose Maria Morelos             | -88.7208143841  | 19.7541928932 | Quintana Roo         | MEXICO | 70     |

|                    |                   |                       |                |               |                              |        |     |
|--------------------|-------------------|-----------------------|----------------|---------------|------------------------------|--------|-----|
| <i>Brumptomyia</i> | <i>mesai</i>      | Jose Maria Morelos    | -88.7208143841 | 19.7541928932 | Quintana Roo                 | MEXICO | 70  |
| <i>Brumptomyia</i> | <i>hamata</i>     | Jose Maria Morelos    | -88.7208143841 | 19.7541928932 | Quintana Roo                 | MEXICO | 70  |
| <i>Lutzomyia</i>   | <i>shannoni</i>   | Jose Maria Morelos    | -88.7208143841 | 19.7541928932 | Quintana Roo                 | MEXICO | 70  |
| <i>Lutzomyia</i>   | <i>panamensis</i> | Jose Maria Morelos    | -88.7208143841 | 19.7541928932 | Quintana Roo                 | MEXICO | 70  |
| <i>Lutzomyia</i>   | <i>cruciata</i>   | Jose Maria Morelos    | -88.7208143841 | 19.7541928932 | Quintana Roo                 | MEXICO | 70  |
| <i>Lutzomyia</i>   | <i>anthophora</i> | Jourdanton            | -98.5465833333 | 28.9180277778 | Texas                        | USA    | 59  |
| <i>Lutzomyia</i>   | <i>cruciata</i>   | Juan Diaz             | -97.8525000000 | 21.4097222222 | Veracruz Ignacio de la Llave | MEXICO | 40  |
| <i>Lutzomyia</i>   | <i>cruciata</i>   | Juan Diaz Covarrubias | -95.1844444444 | 18.1586111111 | Veracruz Ignacio de la Llave | MEXICO | 38  |
| <i>Lutzomyia</i>   | <i>cruciata</i>   | Juchique de Ferrer    | -96.6942499997 | 19.8390499967 | Veracruz Ignacio de la Llave | MEXICO | 50  |
| <i>Lutzomyia</i>   | <i>shannoni</i>   | Kenner                | -90.2417416667 | 29.9940916667 | Louisiana                    | USA    | 105 |
| <i>Lutzomyia</i>   | <i>shannoni</i>   | Knox Site 1           | -83.9371805556 | 36.1272277778 | Tennessee                    | USA    | 41  |
| <i>Lutzomyia</i>   | <i>shannoni</i>   | Knox Site 10          | -83.5030777777 | 35.6922388889 | Tennessee                    | USA    | 41  |
| <i>Lutzomyia</i>   | <i>shannoni</i>   | Knox Site 11          | -83.5640638889 | 36.1651388888 | Tennessee                    | USA    | 41  |

|                  |                 |               |                 |               |           |        |    |
|------------------|-----------------|---------------|-----------------|---------------|-----------|--------|----|
| <i>Lutzomyia</i> | <i>shannoni</i> | Knox Site 2   | -83.9806083333  | 36.1018194444 | Tennessee | USA    | 41 |
| <i>Lutzomyia</i> | <i>shannoni</i> | Knox Site 3   | -83.9593416667  | 36.0379666667 | Tennessee | USA    | 41 |
| <i>Lutzomyia</i> | <i>shannoni</i> | Knox Site 4   | -83.8988472222  | 36.0097555556 | Tennessee | USA    | 41 |
| <i>Lutzomyia</i> | <i>shannoni</i> | Knox Site 5   | -84.1189194444  | 35.9564666667 | Tennessee | USA    | 41 |
| <i>Lutzomyia</i> | <i>shannoni</i> | Knox Site 6   | -84.1107750000  | 35.8993555556 | Tennessee | USA    | 41 |
| <i>Lutzomyia</i> | <i>shannoni</i> | Knox Site 7   | -83.9008444444  | 35.8701611111 | Tennessee | USA    | 41 |
| <i>Lutzomyia</i> | <i>shannoni</i> | Knox Site 8   | -83.4750861111  | 35.4891638889 | Tennessee | USA    | 41 |
| <i>Lutzomyia</i> | <i>vexator</i>  | Knox Site 8   | -83.4750861111  | 35.4891638889 | Tennessee | USA    | 41 |
| <i>Lutzomyia</i> | <i>shannoni</i> | Knox Site 9   | -83.8829361111  | 36.1708722222 | Tennessee | USA    | 41 |
| <i>Lutzomyia</i> | <i>vexator</i>  | Knox Site 9   | -83.8829361111  | 36.1708722222 | Tennessee | USA    | 41 |
| <i>Lutzomyia</i> | <i>shannoni</i> | La Bolita     | -104.9308333333 | 21.9016666667 | Nayarit   | MEXICO | 38 |
| <i>Lutzomyia</i> | <i>cruciata</i> | La Bolita     | -104.9308333333 | 21.9016666667 | Nayarit   | MEXICO | 38 |
| <i>Lutzomyia</i> | <i>cruciata</i> | La Cieneguita | -104.9552800000 | 20.7622200000 | Jalisco   | MEXICO | 40 |

|                    |                      |              |                |               |          |        |            |
|--------------------|----------------------|--------------|----------------|---------------|----------|--------|------------|
| <i>Lutzomyia</i>   | <i>cruciata</i>      | La Granja    | -92.5695561111 | 15.2127250000 | Chiapas  | MEXICO | 105        |
| <i>Lutzomyia</i>   | <i>deleoni</i>       | La Guadalupe | -89.4748333333 | 18.3373333333 | Campeche | MEXICO | 65, 80, 83 |
| <i>Lutzomyia</i>   | <i>ovallesi</i>      | La Guadalupe | -89.4748333333 | 18.3373333333 | Campeche | MEXICO | 65, 80, 83 |
| <i>Lutzomyia</i>   | <i>panamensis</i>    | La Guadalupe | -89.4748333333 | 18.3373333333 | Campeche | MEXICO | 65, 80, 83 |
| <i>Lutzomyia</i>   | <i>shannoni</i>      | La Guadalupe | -89.4748333333 | 18.3373333333 | Campeche | MEXICO | 65, 80, 83 |
| <i>Lutzomyia</i>   | <i>undulata</i>      | La Guadalupe | -89.4748333333 | 18.3373333333 | Campeche | MEXICO | 65, 80, 83 |
| <i>Brumptomyia</i> | <i>mesai</i>         | La Guadalupe | -89.4748333333 | 18.3373333333 | Campeche | MEXICO | 65, 80, 83 |
| <i>Lutzomyia</i>   | <i>carpenteri</i>    | La Guadalupe | -89.4748333333 | 18.3373333333 | Campeche | MEXICO | 65, 80, 83 |
| <i>Lutzomyia</i>   | <i>trinidadensis</i> | La Guadalupe | -89.4748333333 | 18.3373333333 | Campeche | MEXICO | 65, 80, 83 |
| <i>Lutzomyia</i>   | <i>olmeca</i>        | La Guadalupe | -89.4748333333 | 18.3373333333 | Campeche | MEXICO | 65, 80, 83 |
| <i>Lutzomyia</i>   | <i>cruciata</i>      | La Guadalupe | -89.4748333333 | 18.3373333333 | Campeche | MEXICO | 65, 80, 83 |
| <i>Brumptomyia</i> | <i>mesai</i>         | La Libertad  | -90.4648333333 | 18.5266666667 | Campeche | MEXICO | 83         |
| <i>Brumptomyia</i> | <i>hamata</i>        | La Libertad  | -90.4648333333 | 18.5266666667 | Campeche | MEXICO | 43, 83     |

|                  |                    |             |                |               |          |        |    |
|------------------|--------------------|-------------|----------------|---------------|----------|--------|----|
| <i>Lutzomyia</i> | <i>carpenteri</i>  | La Libertad | -90.4648333333 | 18.5266666667 | Campeche | MEXICO | 83 |
| <i>Lutzomyia</i> | <i>cayennensis</i> | La Libertad | -90.4648333333 | 18.5266666667 | Campeche | MEXICO | 83 |
| <i>Lutzomyia</i> | <i>deleoni</i>     | La Libertad | -90.4648333333 | 18.5266666667 | Campeche | MEXICO | 83 |
| <i>Lutzomyia</i> | <i>longipalpis</i> | La Libertad | -90.4648333333 | 18.5266666667 | Campeche | MEXICO | 83 |
| <i>Lutzomyia</i> | <i>olmeca</i>      | La Libertad | -90.4648333333 | 18.5266666667 | Campeche | MEXICO | 83 |
| <i>Lutzomyia</i> | <i>panamensis</i>  | La Libertad | -90.4648333333 | 18.5266666667 | Campeche | MEXICO | 83 |
| <i>Lutzomyia</i> | <i>shannoni</i>    | La Libertad | -90.4648333333 | 18.5266666667 | Campeche | MEXICO | 83 |
| <i>Lutzomyia</i> | <i>ovallesi</i>    | La Libertad | -90.4648333333 | 18.5266666667 | Campeche | MEXICO | 83 |
| <i>Lutzomyia</i> | <i>serrana</i>     | La Libertad | -90.4648333333 | 18.5266666667 | Campeche | MEXICO | 83 |
| <i>Lutzomyia</i> | <i>cayennensis</i> | La Libertad | -90.5132222222 | 18.5675333333 | Campeche | MEXICO | 76 |
| <i>Lutzomyia</i> | <i>carpenteri</i>  | La Libertad | -90.5132222222 | 18.5675333333 | Campeche | MEXICO | 79 |
| <i>Lutzomyia</i> | <i>cratifer</i>    | La Libertad | -90.5132222222 | 18.5675333333 | Campeche | MEXICO | 79 |
| <i>Lutzomyia</i> | <i>deleoni</i>     | La Libertad | -90.5132222222 | 18.5675333333 | Campeche | MEXICO | 79 |

|                  |                      |             |                 |               |          |        |            |
|------------------|----------------------|-------------|-----------------|---------------|----------|--------|------------|
| <i>Lutzomyia</i> | <i>dodgei</i>        | La Libertad | -90.5132222222  | 18.5675333333 | Campeche | MEXICO | 79         |
| <i>Lutzomyia</i> | <i>olmeca</i>        | La Libertad | -90.5132222222  | 18.5675333333 | Campeche | MEXICO | 79         |
| <i>Lutzomyia</i> | <i>ovallesi</i>      | La Libertad | -90.5132222222  | 18.5675333333 | Campeche | MEXICO | 79         |
| <i>Lutzomyia</i> | <i>panamensis</i>    | La Libertad | -90.5132222222  | 18.5675333333 | Campeche | MEXICO | 79         |
| <i>Lutzomyia</i> | <i>permira</i>       | La Libertad | -90.5132222222  | 18.5675333333 | Campeche | MEXICO | 79         |
| <i>Lutzomyia</i> | <i>serrana</i>       | La Libertad | -90.5132222222  | 18.5675333333 | Campeche | MEXICO | 79         |
| <i>Lutzomyia</i> | <i>shannoni</i>      | La Libertad | -90.5132222222  | 18.5675333333 | Campeche | MEXICO | 79         |
| <i>Lutzomyia</i> | <i>trinidadensis</i> | La Libertad | -90.5132222222  | 18.5675333333 | Campeche | MEXICO | 79         |
| <i>Lutzomyia</i> | <i>undulata</i>      | La Libertad | -90.5132222222  | 18.5675333333 | Campeche | MEXICO | 79         |
| <i>Lutzomyia</i> | <i>cruciata</i>      | La Libertad | -90.5132222222  | 18.5675333333 | Campeche | MEXICO | 79         |
| <i>Lutzomyia</i> | <i>cruciata</i>      | La Libertad | -90.4648333333  | 18.5266666667 | Campeche | MEXICO | 81, 82, 83 |
| <i>Lutzomyia</i> | <i>longipalpis</i>   | La Mina     | -99.1794444444  | 18.3541666667 | Guerrero | MEXICO | 20         |
| <i>Lutzomyia</i> | <i>shannoni</i>      | La Mina     | -104.9347222222 | 21.9600000000 | Nayarit  | MEXICO | 38         |

|                  |                     |                 |                |               |                              |        |        |
|------------------|---------------------|-----------------|----------------|---------------|------------------------------|--------|--------|
| <i>Lutzomyia</i> | <i>shannoni</i>     | La Paz Camalote | -94.2686111111 | 17.9527777778 | Veracruz Ignacio de la Llave | MEXICO | 38     |
| <i>Lutzomyia</i> | <i>diabolica</i>    | La Pechera      | -99.6250000000 | 25.7161111111 | Nuevo Leon                   | MEXICO | 43     |
| <i>Lutzomyia</i> | <i>cruciata</i>     | La Playita      | -93.2588900000 | 18.1630600000 | Tabasco                      | MEXICO | 43     |
| <i>Lutzomyia</i> | <i>panamensis</i>   | La Porfia       | -90.7333330000 | 18.5097100000 | Campeche                     | MEXICO | 4      |
| <i>Lutzomyia</i> | <i>shannoni</i>     | La Porfia       | -90.7333330000 | 18.5097100000 | Campeche                     | MEXICO | 4      |
| <i>Lutzomyia</i> | <i>cruciata</i>     | La Porfia       | -90.7333330000 | 18.5097100000 | Campeche                     | MEXICO | 4      |
| <i>Lutzomyia</i> | <i>diabolica</i>    | La Salle        | -96.6691444444 | 28.8664444444 | Texas                        | USA    | 59, 78 |
| <i>Lutzomyia</i> | <i>shannoni</i>     | La Sirena       | -96.6525000000 | 15.9713888889 | Oaxaca                       | MEXICO | 40     |
| <i>Lutzomyia</i> | <i>cruciata</i>     | La Toma         | -96.6691666667 | 17.0869444444 | Oaxaca                       | MEXICO | 40     |
| <i>Lutzomyia</i> | <i>chiapanensis</i> | La Tranca       | -96.2550000000 | 18.7669444444 | Veracruz Ignacio de la Llave | MEXICO | 38     |
| <i>Lutzomyia</i> | <i>carpenteri</i>   | La Virgencita   | -89.3100000000 | 18.2397220000 | Campeche                     | MEXICO | 65     |
| <i>Lutzomyia</i> | <i>deleoni</i>      | La Virgencita   | -89.3100000000 | 18.2397220000 | Campeche                     | MEXICO | 65     |
| <i>Lutzomyia</i> | <i>longipalpis</i>  | La Virgencita   | -89.3100000000 | 18.2397220000 | Campeche                     | MEXICO | 65     |

|                    |                      |                                 |                |               |          |        |          |
|--------------------|----------------------|---------------------------------|----------------|---------------|----------|--------|----------|
| <i>Lutzomyia</i>   | <i>olmeca</i>        | La Virgencita                   | -89.3100000000 | 18.2397220000 | Campeche | MEXICO | 65       |
| <i>Lutzomyia</i>   | <i>ovallesi</i>      | La Virgencita                   | -89.3100000000 | 18.2397220000 | Campeche | MEXICO | 65       |
| <i>Lutzomyia</i>   | <i>panamensis</i>    | La Virgencita                   | -89.3100000000 | 18.2397220000 | Campeche | MEXICO | 65       |
| <i>Lutzomyia</i>   | <i>shannoni</i>      | La Virgencita                   | -89.3100000000 | 18.2397220000 | Campeche | MEXICO | 65       |
| <i>Lutzomyia</i>   | <i>trinidadensis</i> | La Virgencita                   | -89.3100000000 | 18.2397220000 | Campeche | MEXICO | 65       |
| <i>Brumptomyia</i> | <i>mesai</i>         | La Virgencita                   | -89.3100000000 | 18.2397220000 | Campeche | MEXICO | 65       |
| <i>Lutzomyia</i>   | <i>cayennensis</i>   | La Virgencita                   | -89.3100000000 | 18.2397220000 | Campeche | MEXICO | 65       |
| <i>Lutzomyia</i>   | <i>cruciata</i>      | La Virgencita                   | -89.3100000000 | 18.2397220000 | Campeche | MEXICO | 65       |
| <i>Lutzomyia</i>   | <i>anthophora</i>    | Lackland                        | -98.5811111111 | 29.3841527778 | Texas    | USA    | 61       |
| <i>Lutzomyia</i>   | <i>diabolica</i>     | Lackland                        | -98.5811111111 | 29.3841527778 | Texas    | USA    | 61       |
| <i>Lutzomyia</i>   | <i>texana</i>        | Lackland                        | -98.5811111111 | 29.3841527778 | Texas    | USA    | 61       |
| <i>Lutzomyia</i>   | <i>anthophora</i>    | Laguna Atascosa Wildlife Refuge | -97.3853055556 | 26.2869694444 | Texas    | USA    | 104, 105 |
| <i>Lutzomyia</i>   | <i>diabolica</i>     | Laguna Atascosa Wildlife Refuge | -97.3853055556 | 26.2869694444 | Texas    | USA    | 104, 105 |

|                  |                    |                  |                |               |                              |        |    |
|------------------|--------------------|------------------|----------------|---------------|------------------------------|--------|----|
| <i>Lutzomyia</i> | <i>beltrani</i>    | Laguna Encantada | -95.2012250000 | 18.4446111111 | Veracruz Ignacio de la Llave | MEXICO | 94 |
| <i>Lutzomyia</i> | <i>shannoni</i>    | Laguna Encantada | -95.2012250000 | 18.4446111111 | Veracruz Ignacio de la Llave | MEXICO | 40 |
| <i>Lutzomyia</i> | <i>shannoni</i>    | Laguna Guerrero  | -88.2982318160 | 18.6839885440 | Quintana Roo                 | MEXICO | 58 |
| <i>Lutzomyia</i> | <i>carpenteri</i>  | Laguna Guerrero  | -88.2982318160 | 18.6839885440 | Quintana Roo                 | MEXICO | 58 |
| <i>Lutzomyia</i> | <i>cayennensis</i> | Laguna Guerrero  | -88.2982318160 | 18.6839885440 | Quintana Roo                 | MEXICO | 58 |
| <i>Lutzomyia</i> | <i>deleoni</i>     | Laguna Guerrero  | -88.2982318160 | 18.6839885440 | Quintana Roo                 | MEXICO | 58 |
| <i>Lutzomyia</i> | <i>olmeca</i>      | Laguna Guerrero  | -88.2982318160 | 18.6839885440 | Quintana Roo                 | MEXICO | 58 |
| <i>Lutzomyia</i> | <i>permira</i>     | Laguna Guerrero  | -88.2982318160 | 18.6839885440 | Quintana Roo                 | MEXICO | 58 |
| <i>Lutzomyia</i> | <i>deleoni</i>     | Laguna Guerrero  | -88.3087426237 | 18.6809787922 | Quintana Roo                 | MEXICO | 58 |
| <i>Lutzomyia</i> | <i>olmeca</i>      | Laguna Guerrero  | -88.3087426237 | 18.6809787922 | Quintana Roo                 | MEXICO | 58 |
| <i>Lutzomyia</i> | <i>shannoni</i>    | Laguna Guerrero  | -88.3087426237 | 18.6809787922 | Quintana Roo                 | MEXICO | 58 |
| <i>Lutzomyia</i> | <i>cruciata</i>    | Laguna Guerrero  | -88.2982318160 | 18.6839885440 | Quintana Roo                 | MEXICO | 58 |
| <i>Lutzomyia</i> | <i>cruciata</i>    | Laguna Guerrero  | -88.3087426237 | 18.6809787922 | Quintana Roo                 | MEXICO | 58 |

|                  |                     |               |                 |               |                              |        |            |
|------------------|---------------------|---------------|-----------------|---------------|------------------------------|--------|------------|
| <i>Lutzomyia</i> | <i>deleoni</i>      | Lagunitas     | -88.3052777778  | 18.5036111111 | Quintana Roo                 | MEXICO | 38         |
| <i>Lutzomyia</i> | <i>olmeca</i>       | Lagunitas     | -88.3052777778  | 18.5036111111 | Quintana Roo                 | MEXICO | 40         |
| <i>Lutzomyia</i> | <i>diabolica</i>    | Lake Buchanan | -98.4293888889  | 30.7938861111 | Texas                        | USA    | 104, 105   |
| <i>Lutzomyia</i> | <i>anthophora</i>   | Laredo        | -99.5075416667  | 27.5061944444 | Texas                        | USA    | 38         |
| <i>Lutzomyia</i> | <i>diabolica</i>    | Laredo        | -99.5075416667  | 27.5061944444 | Texas                        | USA    | 38         |
| <i>Lutzomyia</i> | <i>diabolica</i>    | Las Adjuntas  | -100.3194500000 | 25.4168055550 | Nuevo Leon                   | MEXICO | 78         |
| <i>Lutzomyia</i> | <i>diabolica</i>    | Las Bajadas   | -96.1867750000  | 19.1450722222 | Veracruz Ignacio de la Llave | MEXICO | 23         |
| <i>Lutzomyia</i> | <i>cruciata</i>     | Las Bajadas   | -96.1867750000  | 19.1450722222 | Veracruz Ignacio de la Llave | MEXICO | 40         |
| <i>Lutzomyia</i> | <i>dodgei</i>       | Las Colonias  | -102.3544555555 | 19.1071916666 | Michoacan de Ocampo          | MEXICO | 45, 96, 97 |
| <i>Lutzomyia</i> | <i>shannoni</i>     | Las Laminas   | -96.3625000000  | 16.2588888800 | Oaxaca                       | MEXICO | 40         |
| <i>Lutzomyia</i> | <i>cruciata</i>     | Las Laminas   | -96.3625000000  | 16.2588888800 | Oaxaca                       | MEXICO | 38         |
| <i>Lutzomyia</i> | <i>chiapanensis</i> | Las Limas     | -96.3741666667  | 18.8383333333 | Veracruz Ignacio de la Llave | MEXICO | 38, 51     |
| <i>Lutzomyia</i> | <i>shannoni</i>     | Las Limas     | -96.3741666667  | 18.8383333333 | Veracruz Ignacio de la Llave | MEXICO | 38         |

|                  |                      |               |                 |               |                     |        |        |
|------------------|----------------------|---------------|-----------------|---------------|---------------------|--------|--------|
| <i>Lutzomyia</i> | <i>anthophora</i>    | Las Majadas   | -102.4071222222 | 19.1250194444 | Michoacan de Ocampo | MEXICO | 46     |
| <i>Lutzomyia</i> | <i>shannoni</i>      | Las Pilas     | -94.7888888889  | 17.0450000000 | Nayarit             | MEXICO | 38, 40 |
| <i>Lutzomyia</i> | <i>serrana</i>       | Las Pilas     | -94.7888888889  | 17.0450000000 | Nayarit             | MEXICO | 38     |
| <i>Lutzomyia</i> | <i>cruciata</i>      | Las Pilas     | -94.7888888889  | 17.0450000000 | Nayarit             | MEXICO | 38     |
| <i>Lutzomyia</i> | <i>shannoni</i>      | Leake         | -89.4742166667  | 32.8073500000 | Mississippi         | USA    | 39     |
| <i>Lutzomyia</i> | <i>deleoni</i>       | Leona Vicario | -87.2000000000  | 20.9902777778 | Quintana Roo        | MEXICO | 18     |
| <i>Lutzomyia</i> | <i>olmeca</i>        | Leona Vicario | -87.2000000000  | 20.9902777778 | Quintana Roo        | MEXICO | 18     |
| <i>Lutzomyia</i> | <i>panamensis</i>    | Leona Vicario | -87.2000000000  | 20.9902777778 | Quintana Roo        | MEXICO | 18     |
| <i>Lutzomyia</i> | <i>cayennensis</i>   | Leona Vicario | -87.2000000000  | 20.9902777778 | Quintana Roo        | MEXICO | 18     |
| <i>Lutzomyia</i> | <i>shannoni</i>      | Leona Vicario | -87.2000000000  | 20.9902777778 | Quintana Roo        | MEXICO | 18     |
| <i>Lutzomyia</i> | <i>trinidadensis</i> | Leona Vicario | -87.2000000000  | 20.9902777778 | Quintana Roo        | MEXICO | 18     |
| <i>Lutzomyia</i> | <i>cruciata</i>      | Leona Vicario | -87.2000000000  | 20.9902777778 | Quintana Roo        | MEXICO | 18     |
| <i>Lutzomyia</i> | <i>olmeca</i>        | Libertad      | -93.1712552778  | 18.0719555556 | Tabasco             | MEXICO | 64     |

|                  |                      |                            |                 |               |                              |        |        |
|------------------|----------------------|----------------------------|-----------------|---------------|------------------------------|--------|--------|
| <i>Lutzomyia</i> | <i>shannoni</i>      | Little Rock Air Force Base | -92.1468583333  | 34.9115916667 | Arkansas                     | USA    | 59     |
| <i>Lutzomyia</i> | <i>vexator</i>       | Livermore                  | -121.7680083333 | 37.6818277778 | California                   | USA    | 8, 56  |
| <i>Lutzomyia</i> | <i>stewarti</i>      | Livermore                  | -121.7680083333 | 37.6818277778 | California                   | USA    | 8, 56  |
| <i>Lutzomyia</i> | <i>cruciata</i>      | Llano Ciruelo              | -96.3041666667  | 15.7977777770 | Oaxaca                       | MEXICO | 38     |
| <i>Lutzomyia</i> | <i>longipalpis</i>   | Llano Grande               | -95.0592861111  | 17.0465972221 | Puebla                       | MEXICO | 20, 71 |
| <i>Lutzomyia</i> | <i>cayennensis</i>   | Llano Grande               | -95.0592861111  | 17.0465972221 | Puebla                       | MEXICO | 71     |
| <i>Lutzomyia</i> | <i>diabolica</i>     | Llano Grande               | -95.0592861111  | 17.0465972221 | Puebla                       | MEXICO | 71     |
| <i>Lutzomyia</i> | <i>dodgei</i>        | Llano Grande               | -95.0592861111  | 17.0465972221 | Puebla                       | MEXICO | 71     |
| <i>Lutzomyia</i> | <i>texana</i>        | Llano Grande               | -95.0592861111  | 17.0465972221 | Puebla                       | MEXICO | 71     |
| <i>Lutzomyia</i> | <i>trinidadensis</i> | Llano Grande               | -95.0592861111  | 17.0465972221 | Puebla                       | MEXICO | 71     |
| <i>Lutzomyia</i> | <i>cruciata</i>      | Llano Juarez               | -96.3198972222  | 15.8301472222 | Oaxaca                       | MEXICO | 43     |
| <i>Lutzomyia</i> | <i>cruciata</i>      | Loma Bonita                | -91.2078888889  | 16.1980555556 | Chiapas                      | MEXICO | 74     |
| <i>Lutzomyia</i> | <i>cruciata</i>      | Loma de San Nicolas        | -96.6941944444  | 19.8428472222 | Veracruz Ignacio de la Llave | MEXICO | 50     |

|                    |                    |                                  |                 |               |                              |        |        |
|--------------------|--------------------|----------------------------------|-----------------|---------------|------------------------------|--------|--------|
| <i>Lutzomyia</i>   | <i>cruciata</i>    | Lomas de los Ingleses            | -95.1741666667  | 18.1408333333 | Veracruz Ignacio de la Llave | MEXICO | 38     |
| <i>Lutzomyia</i>   | <i>shannoni</i>    | Longfellow-Evangeline State Park | -91.8218638889  | 30.1363638889 | Louisiana                    | USA    | 87     |
| <i>Lutzomyia</i>   | <i>diabolica</i>   | Los Rodriguez                    | -101.5177000000 | 27.8754888882 | Coahuila de Zaragoza         | MEXICO | 23, 43 |
| <i>Lutzomyia</i>   | <i>texana</i>      | Los Rodriguez                    | -101.5177000000 | 27.8754888882 | Coahuila de Zaragoza         | MEXICO | 38     |
| <i>Lutzomyia</i>   | <i>beltrani</i>    | Macario Gomez                    | -87.5381327963  | 20.3103244916 | Quintana Roo                 | MEXICO | 58     |
| <i>Lutzomyia</i>   | <i>cayennensis</i> | Macario Gomez                    | -87.5381327963  | 20.3103244916 | Quintana Roo                 | MEXICO | 58     |
| <i>Lutzomyia</i>   | <i>cratifer</i>    | Macario Gomez                    | -87.5381327963  | 20.3103244916 | Quintana Roo                 | MEXICO | 58     |
| <i>Lutzomyia</i>   | <i>deleoni</i>     | Macario Gomez                    | -87.5381327963  | 20.3103244916 | Quintana Roo                 | MEXICO | 58     |
| <i>Brumptomyia</i> | <i>mesai</i>       | Macario Gomez                    | -87.5381327963  | 20.3103244916 | Quintana Roo                 | MEXICO | 58     |
| <i>Lutzomyia</i>   | <i>olmeca</i>      | Macario Gomez                    | -87.5381327963  | 20.3103244916 | Quintana Roo                 | MEXICO | 58     |
| <i>Lutzomyia</i>   | <i>ovallesi</i>    | Macario Gomez                    | -87.5381327963  | 20.3103244916 | Quintana Roo                 | MEXICO | 58     |
| <i>Lutzomyia</i>   | <i>shannoni</i>    | Macario Gomez                    | -87.5381327963  | 20.3103244916 | Quintana Roo                 | MEXICO | 58     |
| <i>Lutzomyia</i>   | <i>steatopyga</i>  | Macario Gomez                    | -87.5381327963  | 20.3103244916 | Quintana Roo                 | MEXICO | 58     |

|                    |                      |               |                |               |              |        |    |
|--------------------|----------------------|---------------|----------------|---------------|--------------|--------|----|
| <i>Lutzomyia</i>   | <i>trinidadensis</i> | Macario Gomez | -87.5381327963 | 20.3103244916 | Quintana Roo | MEXICO | 58 |
| <i>Lutzomyia</i>   | <i>undulata</i>      | Macario Gomez | -87.5381327963 | 20.3103244916 | Quintana Roo | MEXICO | 58 |
| <i>Lutzomyia</i>   | <i>cayennensis</i>   | Macario Gomez | -87.5337053878 | 20.3096784193 | Quintana Roo | MEXICO | 58 |
| <i>Lutzomyia</i>   | <i>deleoni</i>       | Macario Gomez | -87.5337053878 | 20.3096784193 | Quintana Roo | MEXICO | 58 |
| <i>Lutzomyia</i>   | <i>steatopyga</i>    | Macario Gomez | -87.5337053878 | 20.3096784193 | Quintana Roo | MEXICO | 58 |
| <i>Lutzomyia</i>   | <i>undulata</i>      | Macario Gomez | -87.5337053878 | 20.3096784193 | Quintana Roo | MEXICO | 58 |
| <i>Lutzomyia</i>   | <i>cratifer</i>      | Macario Gomez | -87.5337053878 | 20.3096784193 | Quintana Roo | MEXICO | 58 |
| <i>Brumptomyia</i> | <i>mesai</i>         | Macario Gomez | -87.5337053878 | 20.3096784193 | Quintana Roo | MEXICO | 58 |
| <i>Lutzomyia</i>   | <i>longipalpis</i>   | Macario Gomez | -87.5337053878 | 20.3096784193 | Quintana Roo | MEXICO | 58 |
| <i>Lutzomyia</i>   | <i>olmeca</i>        | Macario Gomez | -87.5337053878 | 20.3096784193 | Quintana Roo | MEXICO | 58 |
| <i>Lutzomyia</i>   | <i>ovallesi</i>      | Macario Gomez | -87.5337053878 | 20.3096784193 | Quintana Roo | MEXICO | 58 |
| <i>Lutzomyia</i>   | <i>shannoni</i>      | Macario Gomez | -87.5337053878 | 20.3096784193 | Quintana Roo | MEXICO | 58 |
| <i>Lutzomyia</i>   | <i>cruciata</i>      | Macario Gomez | -87.5381327963 | 20.3103244916 | Quintana Roo | MEXICO | 58 |

|                    |                      |                     |                |               |              |        |     |
|--------------------|----------------------|---------------------|----------------|---------------|--------------|--------|-----|
| <i>Lutzomyia</i>   | <i>cruciata</i>      | Macario Gomez       | -87.5337053878 | 20.3096784193 | Quintana Roo | MEXICO | 58  |
| <i>Brumptomyia</i> | <i>mesai</i>         | Veinte de Noviembre | -89.3002777778 | 18.8144444444 | Campeche     | MEXICO | 73  |
| <i>Lutzomyia</i>   | <i>carpenteri</i>    | Veinte de Noviembre | -89.3002777778 | 18.8144444444 | Campeche     | MEXICO | 73  |
| <i>Lutzomyia</i>   | <i>olmeca</i>        | Veinte de Noviembre | -89.3002777778 | 18.8144444444 | Campeche     | MEXICO | 73  |
| <i>Lutzomyia</i>   | <i>ovallesi</i>      | Veinte de Noviembre | -89.3002777778 | 18.8144444444 | Campeche     | MEXICO | 73  |
| <i>Lutzomyia</i>   | <i>panamensis</i>    | Veinte de Noviembre | -89.3002777778 | 18.8144444444 | Campeche     | MEXICO | 73  |
| <i>Lutzomyia</i>   | <i>shannoni</i>      | Veinte de Noviembre | -89.3002777778 | 18.8144444444 | Campeche     | MEXICO | 73  |
| <i>Lutzomyia</i>   | <i>steatopyga</i>    | Veinte de Noviembre | -89.3002777778 | 18.8144444444 | Campeche     | MEXICO | 73  |
| <i>Lutzomyia</i>   | <i>trinidadensis</i> | Veinte de Noviembre | -89.3002777778 | 18.8144444444 | Campeche     | MEXICO | 73  |
| <i>Lutzomyia</i>   | <i>deleoni</i>       | Veinte de Noviembre | -89.3002777778 | 18.8144444444 | Campeche     | MEXICO | 73  |
| <i>Lutzomyia</i>   | <i>permira</i>       | Veinte de Noviembre | -89.3002777778 | 18.8144444444 | Campeche     | MEXICO | 73  |
| <i>Lutzomyia</i>   | <i>cruciata</i>      | Veinte de Noviembre | -89.3002777778 | 18.8144444444 | Campeche     | MEXICO | 73  |
| <i>Lutzomyia</i>   | <i>shannoni</i>      | Mansfield           | -93.7001833333 | 32.0376388889 | Louisiana    | USA    | 105 |

|                  |                     |                 |                 |               |                              |        |            |
|------------------|---------------------|-----------------|-----------------|---------------|------------------------------|--------|------------|
| <i>Lutzomyia</i> | <i>stewarti</i>     | March Creek     | -121.7325916667 | 37.9110194444 | California                   | USA    | 8, 56, 105 |
| <i>Lutzomyia</i> | <i>vexator</i>      | March Creek     | -121.7325916667 | 37.9110194444 | California                   | USA    | 31, 56     |
| <i>Lutzomyia</i> | <i>californica</i>  | Marfa           | -104.0298583333 | 30.3079250000 | Texas                        | USA    | 26         |
| <i>Lutzomyia</i> | <i>vexator</i>      | Marfa           | -104.0298583333 | 30.3079250000 | Texas                        | USA    | 26         |
| <i>Lutzomyia</i> | <i>anthophora</i>   | Marfa           | -104.0298583333 | 30.3079250000 | Texas                        | USA    | 26         |
| <i>Lutzomyia</i> | <i>panamensis</i>   | Matamoros       | -90.6486100000  | 18.5833333333 | Campeche                     | MEXICO | 3, 4       |
| <i>Lutzomyia</i> | <i>shannoni</i>     | Matamoros       | -90.6486100000  | 18.5833333333 | Campeche                     | MEXICO | 4          |
| <i>Lutzomyia</i> | <i>cruciata</i>     | Matamoros       | -90.6486100000  | 18.5833333333 | Campeche                     | MEXICO | 4, 105     |
| <i>Lutzomyia</i> | <i>chiapanensis</i> | Medellin        | -95.3675000000  | 18.4163888889 | Veracruz Ignacio de la Llave | MEXICO | 51         |
| <i>Lutzomyia</i> | <i>carpenteri</i>   | Medellin        | -95.3675000000  | 18.4163888889 | Veracruz Ignacio de la Llave | MEXICO | 51         |
| <i>Lutzomyia</i> | <i>longipalpis</i>  | Merida-Xmatkuil | -89.6250083333  | 20.8668361111 | Yucatan                      | MEXICO | 84         |
| <i>Lutzomyia</i> | <i>cruciata</i>     | Merida-Xmatkuil | -89.6250083333  | 20.8668361111 | Yucatan                      | MEXICO | 43         |
| <i>Lutzomyia</i> | <i>anthophora</i>   | Miacatlan       | -99.3537277777  | 18.7715083327 | Morelos                      | MEXICO | 105        |

|                    |                      |             |                |               |                  |        |          |
|--------------------|----------------------|-------------|----------------|---------------|------------------|--------|----------|
| <i>Lutzomyia</i>   | <i>diabolica</i>     | Miacatlan   | -99.3537277777 | 18.7715083327 | Morelos          | MEXICO | 105      |
| <i>Lutzomyia</i>   | <i>texana</i>        | Miacatlan   | -99.3537277777 | 18.7715083327 | Morelos          | MEXICO | 105      |
| <i>Lutzomyia</i>   | <i>steatopyga</i>    | Millionario | -88.9948000000 | 16.7435638889 | Distrito el Cayo | BELIZE | 99, 100  |
| <i>Lutzomyia</i>   | <i>beltrani</i>      | Millionario | -88.9948000000 | 16.7435638889 | Distrito el Cayo | BELIZE | 101, 102 |
| <i>Lutzomyia</i>   | <i>deleoni</i>       | Millionario | -88.9948000000 | 16.7435638889 | Distrito el Cayo | BELIZE | 101, 102 |
| <i>Lutzomyia</i>   | <i>shannoni</i>      | Millionario | -88.9948000000 | 16.7435638889 | Distrito el Cayo | BELIZE | 101, 102 |
| <i>Brumptomyia</i> | <i>mesai</i>         | Millionario | -88.9948000000 | 16.7435638889 | Distrito el Cayo | BELIZE | 57, 99   |
| <i>Brumptomyia</i> | <i>hamata</i>        | Millionario | -88.9948000000 | 16.7435638889 | Distrito el Cayo | BELIZE | 57, 99   |
| <i>Lutzomyia</i>   | <i>panamensis</i>    | Millionario | -88.9948000000 | 16.7435638889 | Distrito el Cayo | BELIZE | 57, 99   |
| <i>Lutzomyia</i>   | <i>bispinosa</i>     | Millionario | -88.9948000000 | 16.7435638889 | Distrito el Cayo | BELIZE | 57, 99   |
| <i>Lutzomyia</i>   | <i>trinidadensis</i> | Millionario | -88.9948000000 | 16.7435638889 | Distrito el Cayo | BELIZE | 57, 99   |
| <i>Lutzomyia</i>   | <i>ovallesi</i>      | Millionario | -88.9948000000 | 16.7435638889 | Distrito el Cayo | BELIZE | 57, 99   |
| <i>Lutzomyia</i>   | <i>cruciata</i>      | Millionario | -88.9948000000 | 16.7435638889 | Distrito el Cayo | BELIZE | 57, 99   |

|                    |                      |                     |                |               |                              |        |          |
|--------------------|----------------------|---------------------|----------------|---------------|------------------------------|--------|----------|
| <i>Lutzomyia</i>   | <i>cruciata</i>      | Montebello          | -96.3597222222 | 18.0611111111 | Oaxaca                       | MEXICO | 40       |
| <i>Lutzomyia</i>   | <i>shannoni</i>      | Montgomery          | -83.8897055556 | 38.0314583333 | Tennessee                    | USA    | 67       |
| <i>Lutzomyia</i>   | <i>vexator</i>       | Montgomery          | -83.8897055556 | 38.0314583333 | Tennessee                    | USA    | 67       |
| <i>Lutzomyia</i>   | <i>shannoni</i>      | Monticello          | -83.8701638889 | 30.5452027778 | Florida                      | USA    | 104, 105 |
| <i>Lutzomyia</i>   | <i>panamensis</i>    | Mountain Pine Ridge | -88.8000000000 | 16.9833333000 | Distrito el Cayo             | BELIZE | 57, 99   |
| <i>Lutzomyia</i>   | <i>trinidadensis</i> | Mountain Pine Ridge | -88.8000000000 | 16.9833333000 | Distrito el Cayo             | BELIZE | 57, 99   |
| <i>Lutzomyia</i>   | <i>deleoni</i>       | Mountain Pine Ridge | -88.8000000000 | 16.9833333000 | Distrito el Cayo             | BELIZE | 57, 99   |
| <i>Lutzomyia</i>   | <i>olmeca</i>        | Mountain Pine Ridge | -88.8000000000 | 16.9833333000 | Distrito el Cayo             | BELIZE | 57, 99   |
| <i>Lutzomyia</i>   | <i>carpenteri</i>    | Mountain Pine Ridge | -88.8000000000 | 16.9833333000 | Distrito el Cayo             | BELIZE | 99, 100  |
| <i>Lutzomyia</i>   | <i>cruciata</i>      | Mountain Pine Ridge | -88.8000000000 | 16.9833333000 | Distrito el Cayo             | BELIZE | 57, 99   |
| <i>Lutzomyia</i>   | <i>cratifer</i>      | Nautla              | -96.7729222222 | 20.2066194444 | Veracruz Ignacio de la Llave | MEXICO | 51       |
| <i>Lutzomyia</i>   | <i>shannoni</i>      | Nautla              | -96.7729222222 | 20.2066194444 | Veracruz Ignacio de la Llave | MEXICO | 51       |
| <i>Brumptomyia</i> | <i>mesai</i>         | Never Delay         | -88.7657833333 | 17.3167055555 | Distrito el Cayo             | BELIZE | 57       |

|                  |                      |                       |                 |               |                     |        |        |
|------------------|----------------------|-----------------------|-----------------|---------------|---------------------|--------|--------|
| <i>Lutzomyia</i> | <i>panamensis</i>    | Never Delay           | -88.7657833333  | 17.3167055555 | Distrito el Cayo    | BELIZE | 57     |
| <i>Lutzomyia</i> | <i>permira</i>       | Never Delay           | -88.7657833333  | 17.3167055555 | Distrito el Cayo    | BELIZE | 57     |
| <i>Lutzomyia</i> | <i>cayennensis</i>   | Never Delay           | -88.7657833333  | 17.3167055555 | Distrito el Cayo    | BELIZE | 57     |
| <i>Lutzomyia</i> | <i>trinidadensis</i> | Never Delay           | -88.7657833333  | 17.3167055555 | Distrito el Cayo    | BELIZE | 57     |
| <i>Lutzomyia</i> | <i>beltrani</i>      | Never Delay           | -88.7657833333  | 17.3167055555 | Distrito el Cayo    | BELIZE | 57     |
| <i>Lutzomyia</i> | <i>deleoni</i>       | Never Delay           | -88.7657833333  | 17.3167055555 | Distrito el Cayo    | BELIZE | 57     |
| <i>Lutzomyia</i> | <i>olmeca</i>        | Never Delay           | -88.7657833333  | 17.3167055555 | Distrito el Cayo    | BELIZE | 57     |
| <i>Lutzomyia</i> | <i>shannoni</i>      | Never Delay           | -88.7657833333  | 17.3167055555 | Distrito el Cayo    | BELIZE | 57     |
| <i>Lutzomyia</i> | <i>ovallesi</i>      | Never Delay           | -88.7657833333  | 17.3167055555 | Distrito el Cayo    | BELIZE | 57     |
| <i>Lutzomyia</i> | <i>cruciata</i>      | Never Delay           | -88.7657833333  | 17.3167055555 | Distrito el Cayo    | BELIZE | 57     |
| <i>Lutzomyia</i> | <i>shannoni</i>      | New Orleans           | -90.0715333333  | 29.9510666667 | Louisiana           | USA    | 105    |
| <i>Lutzomyia</i> | <i>anthophora</i>    | Nocupetaro de Morelos | -101.1620277770 | 19.0435138556 | Michoacan de Ocampo | MEXICO | 96, 97 |
| <i>Lutzomyia</i> | <i>diabolica</i>     | Nocupetaro de Morelos | -101.1620277770 | 19.0435138556 | Michoacan de Ocampo | MEXICO | 43     |

|                    |                   |                       |                 |               |                     |        |    |
|--------------------|-------------------|-----------------------|-----------------|---------------|---------------------|--------|----|
| <i>Lutzomyia</i>   | <i>cruciata</i>   | Nocupetaro de Morelos | -101.1620277770 | 19.0435138556 | Michoacan de Ocampo | MEXICO | 38 |
| <i>Brumptomyia</i> | <i>mesai</i>      | Noh-Bec               | -87.8083333333  | 19.2305555556 | Quintana Roo        | MEXICO | 43 |
| <i>Lutzomyia</i>   | <i>ovallesi</i>   | Noh-Bec               | -87.8083333333  | 19.2305555556 | Quintana Roo        | MEXICO | 43 |
| <i>Lutzomyia</i>   | <i>cruciata</i>   | Noh-Bec               | -87.8083333333  | 19.2305555556 | Quintana Roo        | MEXICO | 43 |
| <i>Brumptomyia</i> | <i>hamata</i>     | Nuevo Becal           | -89.2973055552  | 18.6303611104 | Campeche            | MEXICO | 69 |
| <i>Lutzomyia</i>   | <i>carpenteri</i> | Nuevo Becal           | -89.2973055552  | 18.6303611104 | Campeche            | MEXICO | 69 |
| <i>Lutzomyia</i>   | <i>deleoni</i>    | Nuevo Becal           | -89.2973055552  | 18.6303611104 | Campeche            | MEXICO | 69 |
| <i>Lutzomyia</i>   | <i>olmeca</i>     | Nuevo Durango         | -87.5895459714  | 20.7452226524 | Quintana Roo        | MEXICO | 70 |
| <i>Lutzomyia</i>   | <i>shannoni</i>   | Nuevo Durango         | -87.5895459714  | 20.7452226524 | Quintana Roo        | MEXICO | 70 |
| <i>Lutzomyia</i>   | <i>steatopyga</i> | Nuevo Durango         | -87.5895459714  | 20.7452226524 | Quintana Roo        | MEXICO | 70 |
| <i>Lutzomyia</i>   | <i>undulata</i>   | Nuevo Durango         | -87.5895459714  | 20.7452226524 | Quintana Roo        | MEXICO | 70 |
| <i>Lutzomyia</i>   | <i>cruciata</i>   | Nuevo Durango         | -87.5895459714  | 20.7452226524 | Quintana Roo        | MEXICO | 70 |
| <i>Lutzomyia</i>   | <i>cruciata</i>   | Nuevo Montecristo     | -93.3047220000  | 16.9355560000 | Chiapas             | MEXICO | 74 |

|                  |                    |                   |                |               |          |        |          |
|------------------|--------------------|-------------------|----------------|---------------|----------|--------|----------|
| <i>Lutzomyia</i> | <i>undulata</i>    | Rio               | -93.3750000000 | 16.7625000000 | Chiapas  | MEXICO | 32       |
| <i>Lutzomyia</i> | <i>olmeca</i>      | Ocozocoautla      | -93.3750000000 | 16.7625000000 | Chiapas  | MEXICO | 40       |
| <i>Lutzomyia</i> | <i>shannoni</i>    | Ocozocoautla      | -93.3750000000 | 16.7625000000 | Chiapas  | MEXICO | 40       |
| <i>Lutzomyia</i> | <i>ylephiletor</i> | Ocozocoautla      | -93.3750000000 | 16.7625000000 | Chiapas  | MEXICO | 40       |
| <i>Lutzomyia</i> | <i>cratifer</i>    | Ocozocoautla      | -93.3750000000 | 16.7625000000 | Chiapas  | MEXICO | 47       |
| <i>Lutzomyia</i> | <i>shannoni</i>    | O'Leno State Park | -82.6536527778 | 29.9191416667 | Florida  | USA    | 104, 105 |
| <i>Lutzomyia</i> | <i>carpenteri</i>  | Once de Mayo      | -89.4608330000 | 18.0913890000 | Campeche | MEXICO | 75       |
| <i>Lutzomyia</i> | <i>deleoni</i>     | Once de Mayo      | -89.4608330000 | 18.0913890000 | Campeche | MEXICO | 75       |
| <i>Lutzomyia</i> | <i>longipalpis</i> | Once de Mayo      | -89.4608330000 | 18.0913890000 | Campeche | MEXICO | 75       |
| <i>Lutzomyia</i> | <i>olmeca</i>      | Once de Mayo      | -89.4608330000 | 18.0913890000 | Campeche | MEXICO | 75       |
| <i>Lutzomyia</i> | <i>panamensis</i>  | Once de Mayo      | -89.4608330000 | 18.0913890000 | Campeche | MEXICO | 75       |
| <i>Lutzomyia</i> | <i>shannoni</i>    | Once de Mayo      | -89.4608330000 | 18.0913890000 | Campeche | MEXICO | 75       |
| <i>Lutzomyia</i> | <i>undulata</i>    | Once de Mayo      | -89.4608330000 | 18.0913890000 | Campeche | MEXICO | 75       |

|                    |                      |                                  |                 |               |            |        |                       |
|--------------------|----------------------|----------------------------------|-----------------|---------------|------------|--------|-----------------------|
| <i>Lutzomyia</i>   | <i>cruciata</i>      | Once de Mayo                     | -89.4608330000  | 18.0913890000 | Campeche   | MEXICO | 75                    |
| <i>Brumptomyia</i> | <i>mesai</i>         | Opichen                          | -89.8573194444  | 20.5501194444 | Yucatan    | MEXICO | 84                    |
| <i>Lutzomyia</i>   | <i>deleoni</i>       | Opichen                          | -89.8573194444  | 20.5501194444 | Yucatan    | MEXICO | 84                    |
| <i>Lutzomyia</i>   | <i>trinidadensis</i> | Opichen                          | -89.8573194444  | 20.5501194444 | Yucatan    | MEXICO | 84                    |
| <i>Lutzomyia</i>   | <i>cruciata</i>      | Opichen                          | -89.8573194444  | 20.5501194444 | Yucatan    | MEXICO | 84                    |
| <i>Lutzomyia</i>   | <i>shannoni</i>      | Ossabaw Island                   | -81.0945472222  | 31.8010527778 | Georgia    | USA    | 7, 12, 13, 14, 15, 16 |
| <i>Lutzomyia</i>   | <i>vexator</i>       | Ossabaw Island                   | -81.0945472222  | 31.8010527778 | Georgia    | USA    | 105                   |
| <i>Lutzomyia</i>   | <i>californica</i>   | Othello                          | -119.1752916667 | 46.8258305556 | Washington | USA    | 33, 105               |
| <i>Lutzomyia</i>   | <i>vexator</i>       | Othello                          | -119.1752916667 | 46.8258305556 | Washington | USA    | 33                    |
| <i>Lutzomyia</i>   | <i>californica</i>   | P.C. Boyd Desert Research Center | -117.3961555556 | 33.9530527778 | California | USA    | 105                   |
| <i>Lutzomyia</i>   | <i>shannoni</i>      | Paint Creek State Park           | -84.6505027778  | 39.3122888889 | Ohio       | USA    | 67                    |
| <i>Lutzomyia</i>   | <i>longipalpis</i>   | Pala                             | -99.3494444444  | 18.3316666667 | Guerrero   | MEXICO | 20                    |
| <i>Lutzomyia</i>   | <i>permira</i>       | PALENQUE                         | -93.8419400000  | 16.6313900000 | Chiapas    | MEXICO | 30                    |

|                  |                      |                       |                 |               |                              |           |        |
|------------------|----------------------|-----------------------|-----------------|---------------|------------------------------|-----------|--------|
| <i>Lutzomyia</i> | <i>steatopyga</i>    | PALENQUE              | -93.8419400000  | 16.6313900000 | Chiapas                      | MEXICO    | 32     |
| <i>Lutzomyia</i> | <i>cratifer</i>      | PALENQUE              | -93.8419400000  | 16.6313900000 | Chiapas                      | MEXICO    | 47     |
| <i>Lutzomyia</i> | <i>trinidadensis</i> | PALENQUE              | -93.8419400000  | 16.6313900000 | Chiapas                      | MEXICO    | 48     |
| <i>Lutzomyia</i> | <i>longipalpis</i>   | PALENQUE              | -93.8419400000  | 16.6313900000 | Chiapas                      | MEXICO    | 43     |
| <i>Lutzomyia</i> | <i>serrana</i>       | PALENQUE              | -93.8419400000  | 16.6313900000 | Chiapas                      | MEXICO    | 43     |
| <i>Lutzomyia</i> | <i>cruciata</i>      | PALENQUE              | -93.8419400000  | 16.6313900000 | Chiapas                      | MEXICO    | 105    |
| <i>Lutzomyia</i> | <i>stewarti</i>      | Palm Desert           | -116.3744555556 | 33.7222444444 | California                   | USA       | 105    |
| <i>Lutzomyia</i> | <i>chiapanensis</i>  | Palmas de Abajo       | -96.4334111111  | 19.5831000000 | Veracruz Ignacio de la Llave | MEXICO    | 51     |
| <i>Lutzomyia</i> | <i>cruciata</i>      | Panales               | -103.8811111111 | 22.5905555556 | Jalisco                      | MEXICO    | 43     |
| <i>Lutzomyia</i> | <i>cruciata</i>      | Papaloapan            | -96.0947222222  | 18.1591666666 | Oaxaca                       | MEXICO    | 40     |
| <i>Lutzomyia</i> | <i>ovallesi</i>      | Parque Nacional Tikal | -89.5916138889  | 17.2165472222 | Peten                        | GUATEMALA | 85, 86 |
| <i>Lutzomyia</i> | <i>panamensis</i>    | Parque Nacional Tikal | -89.5916138889  | 17.2165472222 | Peten                        | GUATEMALA | 85, 86 |
| <i>Lutzomyia</i> | <i>shannoni</i>      | Parque Nacional Tikal | -89.5916138889  | 17.2165472222 | Peten                        | GUATEMALA | 85, 86 |

|                  |                      |                                   |                |               |            |           |             |
|------------------|----------------------|-----------------------------------|----------------|---------------|------------|-----------|-------------|
| <i>Lutzomyia</i> | <i>undulata</i>      | Parque Nacional Tikal             | -89.5916138889 | 17.2165472222 | Peten      | GUATEMALA | 85, 86      |
| <i>Lutzomyia</i> | <i>ylephiletor</i>   | Parque Nacional Tikal             | -89.5916138889 | 17.2165472222 | Peten      | GUATEMALA | 85, 86      |
| <i>Lutzomyia</i> | <i>serrana</i>       | Parque Nacional Tikal             | -89.5916138889 | 17.2165472222 | Peten      | GUATEMALA | 86          |
| <i>Lutzomyia</i> | <i>olmeca</i>        | Parque Nacional Tikal             | -89.5916138889 | 17.2165472222 | Peten      | GUATEMALA | 86          |
| <i>Lutzomyia</i> | <i>deleoni</i>       | Parque Nacional Tikal             | -89.5916138889 | 17.2165472222 | Peten      | GUATEMALA | 86          |
| <i>Lutzomyia</i> | <i>trinidadensis</i> | Parque Nacional Tikal             | -89.5916138889 | 17.2165472222 | Peten      | GUATEMALA | 86          |
| <i>Lutzomyia</i> | <i>cruciata</i>      | Parque Nacional Tikal             | -89.5916138889 | 17.2165472222 | Peten      | GUATEMALA | 85, 86, 105 |
| <i>Lutzomyia</i> | <i>cruciata</i>      | Paso Limon                        | -96.6822222222 | 15.8833333333 | Oaxaca     | MEXICO    | 38          |
| <i>Lutzomyia</i> | <i>shannoni</i>      | Patuxent National Wildlife Refuge | -76.7476805556 | 38.5399777778 | Maryland   | USA       | 34          |
| <i>Lutzomyia</i> | <i>anthophora</i>    | Pearsall                          | -99.0950333333 | 28.8921611111 | Texas      | USA       | 59          |
| <i>Lutzomyia</i> | <i>diabolica</i>     | Pearsall                          | -99.0950333333 | 28.8921611111 | Texas      | USA       | 59          |
| <i>Lutzomyia</i> | <i>shannoni</i>      | Pennville                         | -75.5165888889 | 39.6536833333 | New Jersey | USA       | 76          |
| <i>Lutzomyia</i> | <i>vexator</i>       | Perth (Black Lake)                | -76.2485666667 | 44.8988816667 | Ontario    | CANADA    | 24          |

|                    |                   |          |                |               |              |        |    |
|--------------------|-------------------|----------|----------------|---------------|--------------|--------|----|
| <i>Lutzomyia</i>   | <i>carpenteri</i> | Petcacab | -88.2097491850 | 19.2487770251 | Quintana Roo | MEXICO | 58 |
| <i>Lutzomyia</i>   | <i>deleoni</i>    | Petcacab | -88.2097491850 | 19.2487770251 | Quintana Roo | MEXICO | 58 |
| <i>Brumptomyia</i> | <i>mesai</i>      | Petcacab | -88.2097491850 | 19.2487770251 | Quintana Roo | MEXICO | 58 |
| <i>Lutzomyia</i>   | <i>shannoni</i>   | Petcacab | -88.2097491850 | 19.2487770251 | Quintana Roo | MEXICO | 58 |
| <i>Lutzomyia</i>   | <i>undulata</i>   | Petcacab | -88.2097491850 | 19.2487770251 | Quintana Roo | MEXICO | 58 |
| <i>Lutzomyia</i>   | <i>olmeca</i>     | Petcacab | -88.2097491850 | 19.2487770251 | Quintana Roo | MEXICO | 58 |
| <i>Lutzomyia</i>   | <i>carpenteri</i> | Petcacab | -88.2133003371 | 19.2517082312 | Quintana Roo | MEXICO | 58 |
| <i>Brumptomyia</i> | <i>mesai</i>      | Petcacab | -88.2133003371 | 19.2517082312 | Quintana Roo | MEXICO | 58 |
| <i>Lutzomyia</i>   | <i>steatopyga</i> | Petcacab | -88.2133003371 | 19.2517082312 | Quintana Roo | MEXICO | 58 |
| <i>Lutzomyia</i>   | <i>deleoni</i>    | Petcacab | -88.2133003371 | 19.2517082312 | Quintana Roo | MEXICO | 58 |
| <i>Lutzomyia</i>   | <i>olmeca</i>     | Petcacab | -88.2133003371 | 19.2517082312 | Quintana Roo | MEXICO | 58 |
| <i>Lutzomyia</i>   | <i>shannoni</i>   | Petcacab | -88.2133003371 | 19.2517082312 | Quintana Roo | MEXICO | 58 |
| <i>Lutzomyia</i>   | <i>cruciata</i>   | Petcacab | -88.2097491850 | 19.2487770251 | Quintana Roo | MEXICO | 58 |

|                  |                   |                  |                 |               |                              |           |          |
|------------------|-------------------|------------------|-----------------|---------------|------------------------------|-----------|----------|
| <i>Lutzomyia</i> | <i>cruciata</i>   | Petcacab         | -88.2133003371  | 19.2517082312 | Quintana Roo                 | MEXICO    | 58       |
| <i>Lutzomyia</i> | <i>olmeca</i>     | Peten            | -90.2995777778  | 16.9093055556 | Peten                        | GUATEMALA | 57       |
| <i>Lutzomyia</i> | <i>cruciata</i>   | Peten            | -90.2995777778  | 16.9093055556 | Peten                        | GUATEMALA | 43       |
| <i>Lutzomyia</i> | <i>cruciata</i>   | Piedra Cuache    | -96.7016666666  | 16.7980555556 | Oaxaca                       | MEXICO    | 40       |
| <i>Lutzomyia</i> | <i>shannoni</i>   | Pine Bluff       | -86.5113777778  | 34.6609250000 | Alabama                      | USA       | 105      |
| <i>Lutzomyia</i> | <i>cruciata</i>   | Piñal            | -96.3711100000  | 15.7255600000 | Oaxaca                       | MEXICO    | 43       |
| <i>Lutzomyia</i> | <i>carpenteri</i> | Pipiapan         | -95.2125000000  | 18.4497222222 | Veracruz Ignacio de la Llave | MEXICO    | 51       |
| <i>Lutzomyia</i> | <i>diabolica</i>  | Plainview        | -101.7067222222 | 34.1847944444 | Texas                        | USA       | 104, 105 |
| <i>Lutzomyia</i> | <i>beltrani</i>   | Playa Escondida  | -95.1112166666  | 18.4216805549 | Veracruz Ignacio de la Llave | MEXICO    | 38, 45   |
| <i>Lutzomyia</i> | <i>vexator</i>    | Plummer's Island | -77.1763694444  | 38.9695555556 | Maryland                     | USA       | 31, 38   |
| <i>Lutzomyia</i> | <i>vexator</i>    | Police Coulee    | -116.5765027778 | 53.9379222222 | Alberta                      | CANADA    | 91       |
| <i>Lutzomyia</i> | <i>shannoni</i>   | Poptun           | -89.4227833333  | 16.3272944444 | Peten                        | GUATEMALA | 77       |
| <i>Lutzomyia</i> | <i>olmeca</i>     | Poptun           | -89.4227833333  | 16.3272944444 | Peten                        | GUATEMALA | 77       |

|                  |                     |               |                |               |                              |           |          |
|------------------|---------------------|---------------|----------------|---------------|------------------------------|-----------|----------|
| <i>Lutzomyia</i> | <i>ylephiletor</i>  | Poptun        | -89.4227833333 | 16.3272944444 | Peten                        | GUATEMALA | 77       |
| <i>Lutzomyia</i> | <i>bispinosa</i>    | Poptun        | -89.4227833333 | 16.3272944444 | Peten                        | GUATEMALA | 77       |
| <i>Lutzomyia</i> | <i>panamensis</i>   | Poptun        | -89.4227833333 | 16.3272944444 | Peten                        | GUATEMALA | 77       |
| <i>Lutzomyia</i> | <i>cruciata</i>     | Poptun        | -89.4227833333 | 16.3272944444 | Peten                        | GUATEMALA | 77       |
| <i>Lutzomyia</i> | <i>diabolica</i>    | Poteet        | -98.5680750000 | 29.0405250000 | Texas                        | USA       | 104, 105 |
| <i>Lutzomyia</i> | <i>shannoni</i>     | Princeton     | -87.8819583333 | 37.1093583333 | Kentucky                     | USA       | 68       |
| <i>Lutzomyia</i> | <i>vexator</i>      | Princeton     | -87.8819583333 | 37.1093583333 | Kentucky                     | USA       | 68       |
| <i>Lutzomyia</i> | <i>shannoni</i>     | Prussia Ridge | -83.0361388889 | 39.0713472222 | Ohio                         | USA       | 67       |
| <i>Lutzomyia</i> | <i>cayennensis</i>  | Puente Jula   | -96.3488888888 | 19.2000000000 | Veracruz Ignacio de la Llave | MEXICO    | 51       |
| <i>Lutzomyia</i> | <i>chiapanensis</i> | Puente Jula   | -96.3488888888 | 19.2000000000 | Veracruz Ignacio de la Llave | MEXICO    | 51       |
| <i>Lutzomyia</i> | <i>shannoni</i>     | Puerto Arturo | -89.0626172504 | 19.6781767101 | Quintana Roo                 | MEXICO    | 58       |
| <i>Lutzomyia</i> | <i>steatopyga</i>   | Puerto Arturo | -89.0626172504 | 19.6781767101 | Quintana Roo                 | MEXICO    | 58       |
| <i>Lutzomyia</i> | <i>cratifer</i>     | Puerto Arturo | -89.0626172504 | 19.6781767101 | Quintana Roo                 | MEXICO    | 58       |

|                    |                    |                 |                 |               |              |           |                 |
|--------------------|--------------------|-----------------|-----------------|---------------|--------------|-----------|-----------------|
| <i>Lutzomyia</i>   | <i>shannoni</i>    | Puerto Arturo   | -89.0626172504  | 19.6781767101 | Quintana Roo | MEXICO    | 58              |
| <i>Lutzomyia</i>   | <i>undulata</i>    | Puerto Arturo   | -89.0626172504  | 19.6781767101 | Quintana Roo | MEXICO    | 58              |
| <i>Lutzomyia</i>   | <i>deleoni</i>     | Puerto Arturo   | -89.0660322464  | 19.6656275088 | Quintana Roo | MEXICO    | 58              |
| <i>Brumptomyia</i> | <i>mesai</i>       | Puerto Arturo   | -89.0660322464  | 19.6656275088 | Quintana Roo | MEXICO    | 58              |
| <i>Lutzomyia</i>   | <i>shannoni</i>    | Puerto Arturo   | -89.0660322464  | 19.6656275088 | Quintana Roo | MEXICO    | 58              |
| <i>Lutzomyia</i>   | <i>cratifer</i>    | Puerto Arturo   | -89.0660322464  | 19.6656275088 | Quintana Roo | MEXICO    | 58              |
| <i>Lutzomyia</i>   | <i>undulata</i>    | Puerto Arturo   | -89.0660322464  | 19.6656275088 | Quintana Roo | MEXICO    | 58              |
| <i>Lutzomyia</i>   | <i>cruciata</i>    | Puerto Arturo   | -89.0626172504  | 19.6781767101 | Quintana Roo | MEXICO    | 58              |
| <i>Lutzomyia</i>   | <i>cruciata</i>    | Puerto Arturo   | -89.0660322464  | 19.6656275088 | Quintana Roo | MEXICO    | 58              |
| <i>Lutzomyia</i>   | <i>cayennensis</i> | Puerto San Jose | -90.8210222222  | 13.9289166667 | Escuintla    | GUATEMALA | 48, 57          |
| <i>Lutzomyia</i>   | <i>undulata</i>    | Puerto San Jose | -90.8210222222  | 13.9289166667 | Escuintla    | GUATEMALA | 29, 32, 57, 105 |
| <i>Lutzomyia</i>   | <i>cruciata</i>    | Puerto San Jose | -90.8210222222  | 13.9289166667 | Escuintla    | GUATEMALA | 57, 105         |
| <i>Lutzomyia</i>   | <i>dodgei</i>      | Purificacion    | -104.6031944444 | 19.7175861104 | Jalisco      | Mexico    | 46              |

|                  |                     |                   |                |               |                  |        |          |
|------------------|---------------------|-------------------|----------------|---------------|------------------|--------|----------|
| <i>Lutzomyia</i> | <i>panamensis</i>   | Putchituk Camp    | -89.0583333333 | 16.7672222222 | Distrito el Cayo | BELIZE | 53       |
| <i>Lutzomyia</i> | <i>bispinosa</i>    | Putchituk Camp    | -89.0583333333 | 16.7672222222 | Distrito el Cayo | BELIZE | 53       |
| <i>Lutzomyia</i> | <i>permira</i>      | Putchituk Camp    | -89.0583333333 | 16.7672222222 | Distrito el Cayo | BELIZE | 57       |
| <i>Lutzomyia</i> | <i>olmeca</i>       | Putchituk Camp    | -89.0583333333 | 16.7672222222 | Distrito el Cayo | BELIZE | 57       |
| <i>Lutzomyia</i> | <i>shannoni</i>     | Quincy            | -84.5832444444 | 30.5854305556 | Florida          | USA    | 104, 105 |
| <i>Lutzomyia</i> | <i>carpenteri</i>   | Rancho La Ceiba   | -88.7747807238 | 19.8582289761 | Quintana Roo     | MEXICO | 20       |
| <i>Lutzomyia</i> | <i>olmeca</i>       | Rancho La Ceiba   | -88.7747807238 | 19.8582289761 | Quintana Roo     | MEXICO | 20       |
| <i>Lutzomyia</i> | <i>ovallesi</i>     | Rancho La Ceiba   | -88.7747807238 | 19.8582289761 | Quintana Roo     | MEXICO | 21       |
| <i>Lutzomyia</i> | <i>panamensis</i>   | Rancho La Ceiba   | -88.7747807238 | 19.8582289761 | Quintana Roo     | MEXICO | 21       |
| <i>Lutzomyia</i> | <i>shannoni</i>     | Rancho La Ceiba   | -88.7747807238 | 19.8582289761 | Quintana Roo     | MEXICO | 20       |
| <i>Lutzomyia</i> | <i>cruciata</i>     | Rancho La Ceiba   | -88.7747807238 | 19.8582289761 | Quintana Roo     | MEXICO | 20       |
| <i>Lutzomyia</i> | <i>chiapanensis</i> | Rancho La Lomita  | -90.3833333333 | 20.5833333333 | Yucatan          | MEXICO | 48       |
| <i>Lutzomyia</i> | <i>diabolica</i>    | Rancho Las Flores | -99.1831250000 | 25.9242805555 | Nuevo Leon       | MEXICO | 78       |

|                  |                      |                                           |                 |               |                                 |        |     |
|------------------|----------------------|-------------------------------------------|-----------------|---------------|---------------------------------|--------|-----|
| <i>Lutzomyia</i> | <i>stewarti</i>      | Rancho Mirage,<br>Magnesis Springs Canyon | -116.4155305556 | 33.7350388889 | California                      | USA    | 105 |
| <i>Lutzomyia</i> | <i>cruciata</i>      | Rancho Pipiapan                           | -95.0602777778  | 18.4450000000 | Veracruz Ignacio<br>de la Llave | MEXICO | 51  |
| <i>Lutzomyia</i> | <i>shannoni</i>      | Reelfoot Lake                             | -89.4221972222  | 36.3860888889 | Tennessee                       | USA    | 92  |
| <i>Lutzomyia</i> | <i>longipalpis</i>   | Rincon del Lucero                         | -99.3298260000  | 18.2808450000 | Guerrero                        | MEXICO | 20  |
| <i>Lutzomyia</i> | <i>shannoni</i>      | Rio Cazones                               | -98.2008277778  | 19.0120416667 | Puebla                          | MEXICO | 3   |
| <i>Lutzomyia</i> | <i>panamensis</i>    | Rio Grande                                | -88.7773305556  | 16.1607194444 | Distrito Toledo                 | BELIZE | 57  |
| <i>Lutzomyia</i> | <i>trinidadensis</i> | Rio Grande                                | -88.7773305556  | 16.1607194444 | Distrito Toledo                 | BELIZE | 57  |
| <i>Lutzomyia</i> | <i>deleoni</i>       | Rio Grande                                | -88.7773305556  | 16.1607194444 | Distrito Toledo                 | BELIZE | 57  |
| <i>Lutzomyia</i> | <i>olmeca</i>        | Rio Grande                                | -88.7773305556  | 16.1607194444 | Distrito Toledo                 | BELIZE | 57  |
| <i>Lutzomyia</i> | <i>cratifer</i>      | Rio Grande                                | -88.7773305556  | 16.1607194444 | Distrito Toledo                 | BELIZE | 57  |
| <i>Lutzomyia</i> | <i>shannoni</i>      | Rio Grande                                | -88.7773305556  | 16.1607194444 | Distrito Toledo                 | BELIZE | 57  |
| <i>Lutzomyia</i> | <i>ovallesi</i>      | Rio Grande                                | -88.7773305556  | 16.1607194444 | Distrito Toledo                 | BELIZE | 57  |
| <i>Lutzomyia</i> | <i>cruciata</i>      | Rio Grande                                | -88.7773305556  | 16.1607194444 | Distrito Toledo                 | BELIZE | 57  |

|                    |                      |               |                |               |                  |        |          |
|--------------------|----------------------|---------------|----------------|---------------|------------------|--------|----------|
| <i>Lutzomyia</i>   | <i>cruciata</i>      | Rio Platanar  | -96.5586111111 | 15.9133333333 | Oaxaca           | MEXICO | 40       |
| <i>Lutzomyia</i>   | <i>cruciata</i>      | Rio Sarabia   | -94.9333330000 | 17.1833330000 | Oaxaca           | MEXICO | 43       |
| <i>Lutzomyia</i>   | <i>dodgei</i>        | Rio Sabanal   | -93.0762666660 | 16.7732166600 | Chiapas          | MEXICO | 30       |
| <i>Lutzomyia</i>   | <i>shannoni</i>      | Rio Sordo     | -96.8111583333 | 17.2466666667 | Oaxaca           | MEXICO | 38       |
| <i>Lutzomyia</i>   | <i>cruciata</i>      | Rio Verde     | -94.7888888889 | 17.0450000000 | Oaxaca           | MEXICO | 38       |
| <i>Lutzomyia</i>   | <i>shannoni</i>      | River Styx    | -82.2406722222 | 29.5348805556 | Florida          | USA    | 104, 105 |
| <i>Lutzomyia</i>   | <i>steatopyga</i>    | Roaring River | -88.7984722222 | 17.2330377778 | Distrito el Cayo | BELIZE | 99, 100  |
| <i>Lutzomyia</i>   | <i>trinidadensis</i> | Roaring River | -88.7984722222 | 17.2330377778 | Distrito el Cayo | BELIZE | 99, 100  |
| <i>Lutzomyia</i>   | <i>shannoni</i>      | Roaring River | -88.7984722222 | 17.2330377778 | Distrito el Cayo | BELIZE | 99, 100  |
| <i>Brumptomyia</i> | <i>mesai</i>         | Roaring River | -88.7984722222 | 17.2330377778 | Distrito el Cayo | BELIZE | 57, 99   |
| <i>Lutzomyia</i>   | <i>panamensis</i>    | Roaring River | -88.7984722222 | 17.2330377778 | Distrito el Cayo | BELIZE | 57, 99   |
| <i>Lutzomyia</i>   | <i>bispinosa</i>     | Roaring River | -88.7984722222 | 17.2330377778 | Distrito el Cayo | BELIZE | 57, 99   |
| <i>Lutzomyia</i>   | <i>permira</i>       | Roaring River | -88.7984722222 | 17.2330377778 | Distrito el Cayo | BELIZE | 57, 99   |

|                    |                    |               |                |               |                  |        |         |
|--------------------|--------------------|---------------|----------------|---------------|------------------|--------|---------|
| <i>Lutzomyia</i>   | <i>cayennensis</i> | Roaring River | -88.7984722222 | 17.2330377778 | Distrito el Cayo | BELIZE | 57, 99  |
| <i>Lutzomyia</i>   | <i>beltrani</i>    | Roaring River | -88.7984722222 | 17.2330377778 | Distrito el Cayo | BELIZE | 57, 99  |
| <i>Lutzomyia</i>   | <i>deleoni</i>     | Roaring River | -88.7984722222 | 17.2330377778 | Distrito el Cayo | BELIZE | 57, 99  |
| <i>Lutzomyia</i>   | <i>olmeca</i>      | Roaring River | -88.7984722222 | 17.2330377778 | Distrito el Cayo | BELIZE | 57, 99  |
| <i>Lutzomyia</i>   | <i>ovallesi</i>    | Roaring River | -88.7984722222 | 17.2330377778 | Distrito el Cayo | BELIZE | 57, 99  |
| <i>Lutzomyia</i>   | <i>carpenteri</i>  | Roaring River | -88.7984722222 | 17.2330377778 | Distrito el Cayo | BELIZE | 99, 100 |
| <i>Lutzomyia</i>   | <i>ylephiletor</i> | Roaring River | -88.7984722222 | 17.2330377778 | Distrito el Cayo | BELIZE | 103     |
| <i>Lutzomyia</i>   | <i>cruciata</i>    | Roaring River | -88.7984722222 | 17.2330377778 | Distrito el Cayo | BELIZE | 57, 99  |
| <i>Lutzomyia</i>   | <i>shannoni</i>    | Rose Hill     | -78.0228916667 | 34.8282000000 | North Caroline   | USA    | 105     |
| <i>Lutzomyia</i>   | <i>carpenteri</i>  | Saban         | -88.4571559523 | 19.9675808880 | Quintana Roo     | MEXICO | 58      |
| <i>Brumptomyia</i> | <i>mesai</i>       | Saban         | -88.4571559523 | 19.9675808880 | Quintana Roo     | MEXICO | 58      |
| <i>Lutzomyia</i>   | <i>shannoni</i>    | Saban         | -88.4571559523 | 19.9675808880 | Quintana Roo     | MEXICO | 58      |
| <i>Lutzomyia</i>   | <i>undulata</i>    | Saban         | -88.4571559523 | 19.9675808880 | Quintana Roo     | MEXICO | 58      |

|                    |                      |                        |                |               |              |        |              |
|--------------------|----------------------|------------------------|----------------|---------------|--------------|--------|--------------|
| <i>Lutzomyia</i>   | <i>cratifer</i>      | Saban                  | -88.4571559523 | 19.9675808880 | Quintana Roo | MEXICO | 58           |
| <i>Lutzomyia</i>   | <i>cratifer</i>      | Saban                  | -88.4961852661 | 19.9843399712 | Quintana Roo | MEXICO | 58           |
| <i>Lutzomyia</i>   | <i>deleoni</i>       | Saban                  | -88.4961852661 | 19.9843399712 | Quintana Roo | MEXICO | 58           |
| <i>Lutzomyia</i>   | <i>steatopyga</i>    | Saban                  | -88.4961852661 | 19.9843399712 | Quintana Roo | MEXICO | 58           |
| <i>Lutzomyia</i>   | <i>trinidadensis</i> | Saban                  | -88.4961852661 | 19.9843399712 | Quintana Roo | MEXICO | 58           |
| <i>Brumptomyia</i> | <i>mesai</i>         | Saban                  | -88.4961852661 | 19.9843399712 | Quintana Roo | MEXICO | 58           |
| <i>Lutzomyia</i>   | <i>shannoni</i>      | Saban                  | -88.4961852661 | 19.9843399712 | Quintana Roo | MEXICO | 58           |
| <i>Lutzomyia</i>   | <i>undulata</i>      | Saban                  | -88.4961852661 | 19.9843399712 | Quintana Roo | MEXICO | 58           |
| <i>Lutzomyia</i>   | <i>cruciata</i>      | Saban                  | -88.4571559523 | 19.9675808880 | Quintana Roo | MEXICO | 58           |
| <i>Lutzomyia</i>   | <i>cruciata</i>      | Saban                  | -88.4961852661 | 19.9843399712 | Quintana Roo | MEXICO | 58           |
| <i>Lutzomyia</i>   | <i>shannoni</i>      | Sam Houston State Park | -93.3388916667 | 30.2086277778 | Louisiana    | USA    | 87           |
| <i>Lutzomyia</i>   | <i>anthophora</i>    | San Antonio            | -98.4936277778 | 29.4241222222 | Texas        | USA    | 62, 104, 105 |
| <i>Lutzomyia</i>   | <i>texana</i>        | San Antonio            | -98.4936277778 | 29.4241222222 | Texas        | USA    | 19, 104, 105 |

|                  |                      |                        |                |               |                  |        |             |
|------------------|----------------------|------------------------|----------------|---------------|------------------|--------|-------------|
| <i>Lutzomyia</i> | <i>steatopyga</i>    | San Antonio (Cayo)     | -89.0239083333 | 17.0796666667 | Distrito el Cayo | BELIZE | 99, 100     |
| <i>Lutzomyia</i> | <i>trinidadensis</i> | San Antonio (Cayo)     | -89.0239083333 | 17.0796666667 | Distrito el Cayo | BELIZE | 57, 99, 100 |
| <i>Lutzomyia</i> | <i>ovallesi</i>      | San Antonio (Cayo)     | -89.0239083333 | 17.0796666667 | Distrito el Cayo | BELIZE | 57, 99      |
| <i>Lutzomyia</i> | <i>beltrani</i>      | San Antonio (Cayo)     | -89.0239083333 | 17.0796666667 | Distrito el Cayo | BELIZE | 57, 99      |
| <i>Lutzomyia</i> | <i>olmeca</i>        | San Antonio (Cayo)     | -89.0239083333 | 17.0796666667 | Distrito el Cayo | BELIZE | 101, 102    |
| <i>Lutzomyia</i> | <i>panamensis</i>    | San Antonio (Cayo)     | -89.0239083333 | 17.0796666667 | Distrito el Cayo | BELIZE | 101, 102    |
| <i>Lutzomyia</i> | <i>shannoni</i>      | San Antonio (Cayo)     | -89.0239083333 | 17.0796666667 | Distrito el Cayo | BELIZE | 57, 99      |
| <i>Lutzomyia</i> | <i>deleoni</i>       | San Antonio (Cayo)     | -89.0239083333 | 17.0796666667 | Distrito el Cayo | BELIZE | 57, 99      |
| <i>Lutzomyia</i> | <i>carpenteri</i>    | San Antonio (Cayo)     | -89.0239083333 | 17.0796666667 | Distrito el Cayo | BELIZE | 99, 100     |
| <i>Lutzomyia</i> | <i>cruciata</i>      | San Antonio (Cayo)     | -89.0239083333 | 17.0796666667 | Distrito el Cayo | BELIZE | 101, 102    |
| <i>Lutzomyia</i> | <i>cruciata</i>      | San Antonio Buenavista | -91.6496444444 | 16.1524722222 | Chiapas          | MEXICO | 74          |
| <i>Lutzomyia</i> | <i>beltrani</i>      | San Antonio Nuevo      | -88.0786733250 | 19.6262442933 | Quintana Roo     | MEXICO | 58          |
| <i>Lutzomyia</i> | <i>carpenteri</i>    | San Antonio Nuevo      | -88.0786733250 | 19.6262442933 | Quintana Roo     | MEXICO | 58          |

|                  |                      |                   |                |               |              |        |    |
|------------------|----------------------|-------------------|----------------|---------------|--------------|--------|----|
| <i>Lutzomyia</i> | <i>cratifer</i>      | San Antonio Nuevo | -88.0786733250 | 19.6262442933 | Quintana Roo | MEXICO | 58 |
| <i>Lutzomyia</i> | <i>deleoni</i>       | San Antonio Nuevo | -88.0786733250 | 19.6262442933 | Quintana Roo | MEXICO | 58 |
| <i>Lutzomyia</i> | <i>shannoni</i>      | San Antonio Nuevo | -88.0786733250 | 19.6262442933 | Quintana Roo | MEXICO | 58 |
| <i>Lutzomyia</i> | <i>steatopyga</i>    | San Antonio Nuevo | -88.0786733250 | 19.6262442933 | Quintana Roo | MEXICO | 58 |
| <i>Lutzomyia</i> | <i>trinidadensis</i> | San Antonio Nuevo | -88.0786733250 | 19.6262442933 | Quintana Roo | MEXICO | 58 |
| <i>Lutzomyia</i> | <i>longipalpis</i>   | San Antonio Nuevo | -88.0786733250 | 19.6262442933 | Quintana Roo | MEXICO | 58 |
| <i>Lutzomyia</i> | <i>undulata</i>      | San Antonio Nuevo | -88.0786733250 | 19.6262442933 | Quintana Roo | MEXICO | 58 |
| <i>Lutzomyia</i> | <i>undulata</i>      | San Antonio Nuevo | -88.0662706281 | 19.6239327247 | Quintana Roo | MEXICO | 58 |
| <i>Lutzomyia</i> | <i>cratifer</i>      | San Antonio Nuevo | -88.0662706281 | 19.6239327247 | Quintana Roo | MEXICO | 58 |
| <i>Lutzomyia</i> | <i>deleoni</i>       | San Antonio Nuevo | -88.0662706281 | 19.6239327247 | Quintana Roo | MEXICO | 58 |
| <i>Lutzomyia</i> | <i>longipalpis</i>   | San Antonio Nuevo | -88.0662706281 | 19.6239327247 | Quintana Roo | MEXICO | 58 |
| <i>Lutzomyia</i> | <i>shannoni</i>      | San Antonio Nuevo | -88.0662706281 | 19.6239327247 | Quintana Roo | MEXICO | 58 |
| <i>Lutzomyia</i> | <i>steatopyga</i>    | San Antonio Nuevo | -88.0662706281 | 19.6239327247 | Quintana Roo | MEXICO | 58 |

|                    |                    |                     |                |               |                  |           |                  |
|--------------------|--------------------|---------------------|----------------|---------------|------------------|-----------|------------------|
| <i>Lutzomyia</i>   | <i>cruciata</i>    | San Antonio Nuevo   | -88.0786733250 | 19.6262442933 | Quintana Roo     | MEXICO    | 58               |
| <i>Lutzomyia</i>   | <i>cruciata</i>    | San Antonio Nuevo   | -88.0662706281 | 19.6239327247 | Quintana Roo     | MEXICO    | 58               |
| <i>Lutzomyia</i>   | <i>cayennensis</i> | San Carlos Yautepec | -96.0006572222 | 16.4965500000 | Oaxaca           | MEXICO    | 38               |
| <i>Lutzomyia</i>   | <i>shannoni</i>    | San Felasco Hammock | -82.4665972222 | 29.7282472222 | Florida          | USA       | 54, 55, 104, 105 |
| <i>Lutzomyia</i>   | <i>vexator</i>     | San Felasco Hammock | -82.4665972222 | 29.7282472222 | Florida          | USA       | 55               |
| <i>Lutzomyia</i>   | <i>cruciata</i>    | San Felasco Hammock | -82.4665972222 | 29.7282472222 | Florida          | USA       | 104, 105         |
| <i>Lutzomyia</i>   | <i>cruciata</i>    | San Francisco       | -89.9330888889 | 16.7917833333 | Peten            | GUATEMALA | 105              |
| <i>Lutzomyia</i>   | <i>panamensis</i>  | San Ignacio         | -89.0752777777 | 17.1667476852 | Distrito el Cayo | BELIZE    | 57               |
| <i>Lutzomyia</i>   | <i>olmeca</i>      | San Ignacio         | -89.0752777777 | 17.1667476852 | Distrito el Cayo | BELIZE    | 57               |
| <i>Lutzomyia</i>   | <i>shannoni</i>    | San Ignacio         | -89.0752777777 | 17.1667476852 | Distrito el Cayo | BELIZE    | 57               |
| <i>Lutzomyia</i>   | <i>carpenteri</i>  | San Ignacio         | -89.0752777777 | 17.1667476852 | Distrito el Cayo | BELIZE    | 99, 100          |
| <i>Lutzomyia</i>   | <i>cruciata</i>    | San Ignacio         | -89.0752777777 | 17.1667476852 | Distrito el Cayo | BELIZE    | 57               |
| <i>Brumptomyia</i> | <i>mesai</i>       | San Isidro Poniente | -88.8904288067 | 19.3252425328 | Quintana Roo     | MEXICO    | 58               |

|                  |                    |                         |                |               |              |        |    |
|------------------|--------------------|-------------------------|----------------|---------------|--------------|--------|----|
| <i>Lutzomyia</i> | <i>shannoni</i>    | San Isidro Poniente     | -88.8904288067 | 19.3252425328 | Quintana Roo | MEXICO | 58 |
| <i>Lutzomyia</i> | <i>longipalpis</i> | San Isidro Poniente     | -88.8904288067 | 19.3252425328 | Quintana Roo | MEXICO | 58 |
| <i>Lutzomyia</i> | <i>steatopyga</i>  | San Isidro Poniente     | -88.8904288067 | 19.3252425328 | Quintana Roo | MEXICO | 58 |
| <i>Lutzomyia</i> | <i>deleoni</i>     | San Isidro Poniente     | -88.9046755113 | 19.3442541584 | Quintana Roo | MEXICO | 58 |
| <i>Lutzomyia</i> | <i>shannoni</i>    | San Isidro Poniente     | -88.9046755113 | 19.3442541584 | Quintana Roo | MEXICO | 58 |
| <i>Lutzomyia</i> | <i>steatopyga</i>  | San Isidro Poniente     | -88.9046755113 | 19.3442541584 | Quintana Roo | MEXICO | 58 |
| <i>Lutzomyia</i> | <i>cayennensis</i> | San Isidro Poniente     | -88.9046755113 | 19.3442541584 | Quintana Roo | MEXICO | 58 |
| <i>Lutzomyia</i> | <i>cratifer</i>    | San Isidro Poniente     | -88.9046755113 | 19.3442541584 | Quintana Roo | MEXICO | 58 |
| <i>Lutzomyia</i> | <i>undulata</i>    | San Isidro Poniente     | -88.9046755113 | 19.3442541584 | Quintana Roo | MEXICO | 58 |
| <i>Lutzomyia</i> | <i>cruciata</i>    | San Isidro Poniente     | -88.8904288067 | 19.3252425328 | Quintana Roo | MEXICO | 58 |
| <i>Lutzomyia</i> | <i>cruciata</i>    | San Isidro Poniente     | -88.9046755113 | 19.3442541584 | Quintana Roo | MEXICO | 58 |
| <i>Lutzomyia</i> | <i>cruciata</i>    | San Jose Chinantequilla | -95.9900000000 | 17.3069400000 | Oaxaca       | MEXICO | 38 |
| <i>Lutzomyia</i> | <i>carpenteri</i>  | San Jose Nexapa         | -92.2582222222 | 15.0628333333 | Chiapas      | MEXICO | 66 |

|                  |                      |                     |                 |               |                              |        |    |
|------------------|----------------------|---------------------|-----------------|---------------|------------------------------|--------|----|
| <i>Lutzomyia</i> | <i>cruciata</i>      | San Jose Nexapa     | -92.2582222222  | 15.0628333333 | Chiapas                      | MEXICO | 66 |
| <i>Lutzomyia</i> | <i>cruciata</i>      | San Juan Viejo      | -95.1597200000  | 17.0444400000 | Oaxaca                       | MEXICO | 43 |
| <i>Lutzomyia</i> | <i>longipalpis</i>   | San Lucas           | -100.7854999996 | 18.5702777778 | Michoacan de Ocampo          | MEXICO | 43 |
| <i>Lutzomyia</i> | <i>shannoni</i>      | San Miguel Chongos  | -95.9677777700  | 16.0050000000 | Oaxaca                       | MEXICO | 38 |
| <i>Lutzomyia</i> | <i>cruciata</i>      | San Miguel Chongos  | -95.9677777700  | 16.0050000000 | Oaxaca                       | MEXICO | 38 |
| <i>Lutzomyia</i> | <i>cruciata</i>      | San Miguel Ecatepec | -95.7550000000  | 16.2597222222 | Oaxaca                       | MEXICO | 38 |
| <i>Lutzomyia</i> | <i>cayennensis</i>   | San Pedro Columbia  | -88.9535555555  | 16.2701166667 | Distrito Toledo              | BELIZE | 57 |
| <i>Lutzomyia</i> | <i>trinidadensis</i> | San Pedro Columbia  | -88.9535555555  | 16.2701166667 | Distrito Toledo              | BELIZE | 57 |
| <i>Lutzomyia</i> | <i>olmeca</i>        | San Pedro Columbia  | -88.9535555555  | 16.2701166667 | Distrito Toledo              | BELIZE | 57 |
| <i>Lutzomyia</i> | <i>shannoni</i>      | San Pedro Columbia  | -88.9535555555  | 16.2701166667 | Distrito Toledo              | BELIZE | 57 |
| <i>Lutzomyia</i> | <i>cruciata</i>      | San Pedro Columbia  | -88.9535555555  | 16.2701166667 | Distrito Toledo              | BELIZE | 57 |
| <i>Lutzomyia</i> | <i>cruciata</i>      | San Pedro Ixcatlan  | -96.5097222220  | 18.1444440000 | Oaxaca                       | MEXICO | 38 |
| <i>Lutzomyia</i> | <i>shannoni</i>      | San Pedro Mezcalapa | -94.3094400000  | 17.8936100000 | Veracruz Ignacio de la Llave | MEXICO | 47 |

|                    |                    |                     |                |               |                              |        |    |
|--------------------|--------------------|---------------------|----------------|---------------|------------------------------|--------|----|
| <i>Lutzomyia</i>   | <i>undulata</i>    | San Pedro Mezcalapa | -96.6941527778 | 19.8387527778 | Veracruz Ignacio de la Llave | MEXICO | 51 |
| <i>Lutzomyia</i>   | <i>carpenteri</i>  | San Pedro Peralta   | -88.8498910442 | 18.6538842727 | Quintana Roo                 | MEXICO | 58 |
| <i>Lutzomyia</i>   | <i>deleoni</i>     | San Pedro Peralta   | -88.8498910442 | 18.6538842727 | Quintana Roo                 | MEXICO | 58 |
| <i>Brumptomyia</i> | <i>mesai</i>       | San Pedro Peralta   | -88.8498910442 | 18.6538842727 | Quintana Roo                 | MEXICO | 58 |
| <i>Lutzomyia</i>   | <i>ovallesi</i>    | San Pedro Peralta   | -88.8498910442 | 18.6538842727 | Quintana Roo                 | MEXICO | 58 |
| <i>Lutzomyia</i>   | <i>panamensis</i>  | San Pedro Peralta   | -88.8498910442 | 18.6538842727 | Quintana Roo                 | MEXICO | 58 |
| <i>Lutzomyia</i>   | <i>shannoni</i>    | San Pedro Peralta   | -88.8498910442 | 18.6538842727 | Quintana Roo                 | MEXICO | 58 |
| <i>Lutzomyia</i>   | <i>steatopyga</i>  | San Pedro Peralta   | -88.8498910442 | 18.6538842727 | Quintana Roo                 | MEXICO | 58 |
| <i>Lutzomyia</i>   | <i>olmeca</i>      | San Pedro Peralta   | -88.8498910442 | 18.6538842727 | Quintana Roo                 | MEXICO | 58 |
| <i>Lutzomyia</i>   | <i>longipalpis</i> | San Pedro Peralta   | -88.8498910442 | 18.6538842727 | Quintana Roo                 | MEXICO | 58 |
| <i>Lutzomyia</i>   | <i>undulata</i>    | San Pedro Peralta   | -88.8498910442 | 18.6538842727 | Quintana Roo                 | MEXICO | 58 |
| <i>Lutzomyia</i>   | <i>carpenteri</i>  | San Pedro Peralta   | -88.8476212070 | 18.6543312204 | Quintana Roo                 | MEXICO | 58 |
| <i>Brumptomyia</i> | <i>hamata</i>      | San Pedro Peralta   | -88.8476212070 | 18.6543312204 | Quintana Roo                 | MEXICO | 58 |

|                    |                    |                    |                |               |                              |        |    |
|--------------------|--------------------|--------------------|----------------|---------------|------------------------------|--------|----|
| <i>Lutzomyia</i>   | <i>cratifer</i>    | San Pedro Peralta  | -88.8476212070 | 18.6543312204 | Quintana Roo                 | MEXICO | 58 |
| <i>Lutzomyia</i>   | <i>deleoni</i>     | San Pedro Peralta  | -88.8476212070 | 18.6543312204 | Quintana Roo                 | MEXICO | 58 |
| <i>Brumptomyia</i> | <i>mesai</i>       | San Pedro Peralta  | -88.8476212070 | 18.6543312204 | Quintana Roo                 | MEXICO | 58 |
| <i>Lutzomyia</i>   | <i>longipalpis</i> | San Pedro Peralta  | -88.8476212070 | 18.6543312204 | Quintana Roo                 | MEXICO | 58 |
| <i>Lutzomyia</i>   | <i>olmeca</i>      | San Pedro Peralta  | -88.8476212070 | 18.6543312204 | Quintana Roo                 | MEXICO | 58 |
| <i>Lutzomyia</i>   | <i>ovallesi</i>    | San Pedro Peralta  | -88.8476212070 | 18.6543312204 | Quintana Roo                 | MEXICO | 58 |
| <i>Lutzomyia</i>   | <i>panamensis</i>  | San Pedro Peralta  | -88.8476212070 | 18.6543312204 | Quintana Roo                 | MEXICO | 58 |
| <i>Lutzomyia</i>   | <i>shannoni</i>    | San Pedro Peralta  | -88.8476212070 | 18.6543312204 | Quintana Roo                 | MEXICO | 58 |
| <i>Lutzomyia</i>   | <i>steatopyga</i>  | San Pedro Peralta  | -88.8476212070 | 18.6543312204 | Quintana Roo                 | MEXICO | 58 |
| <i>Lutzomyia</i>   | <i>undulata</i>    | San Pedro Peralta  | -88.8476212070 | 18.6543312204 | Quintana Roo                 | MEXICO | 58 |
| <i>Lutzomyia</i>   | <i>cruciata</i>    | San Pedro Peralta  | -88.8498910442 | 18.6538842727 | Quintana Roo                 | MEXICO | 58 |
| <i>Lutzomyia</i>   | <i>cruciata</i>    | San Pedro Peralta  | -88.8476212070 | 18.6543312204 | Quintana Roo                 | MEXICO | 58 |
| <i>Lutzomyia</i>   | <i>shannoni</i>    | San Pedro Soteapan | -94.8727777778 | 18.2313888888 | Veracruz Ignacio de la Llave | MEXICO | 51 |

|                    |                    |                           |                |               |              |        |         |
|--------------------|--------------------|---------------------------|----------------|---------------|--------------|--------|---------|
| <i>Lutzomyia</i>   | <i>diabolica</i>   | San Vicente Boqueron      | -98.0539555556 | 18.2772249993 | Puebla       | MEXICO | 43      |
| <i>Lutzomyia</i>   | <i>longipalpis</i> | San Vicente Boqueron      | -98.0539555556 | 18.2772249993 | Puebla       | MEXICO | 43      |
| <i>Lutzomyia</i>   | <i>diabolica</i>   | Santa Ana                 | -98.7459027744 | 20.1153777777 | Hidalgo      | MEXICO | 32      |
| <i>Lutzomyia</i>   | <i>cruciata</i>    | Santa Ana                 | -98.7459027744 | 20.1153777777 | Hidalgo      | MEXICO | 32, 105 |
| <i>Lutzomyia</i>   | <i>shannoni</i>    | Santa Catarina Jamixtepec | -96.0411100000 | 16.0161100000 | Oaxaca       | MEXICO | 47      |
| <i>Lutzomyia</i>   | <i>cruciata</i>    | Santa Catarina Jamixtepec | -96.0411100000 | 16.0161100000 | Oaxaca       | MEXICO | 38      |
| <i>Lutzomyia</i>   | <i>longipalpis</i> | Santa Cruz                | -99.3404900000 | 18.3000000000 | Guerrero     | MEXICO | 20      |
| <i>Lutzomyia</i>   | <i>shannoni</i>    | Santa Cruz Condoy         | -95.7958333333 | 16.9786111111 | Oaxaca       | MEXICO | 38      |
| <i>Lutzomyia</i>   | <i>cruciata</i>    | Santa Cruz Condoy         | -95.7958333333 | 16.9786111111 | Oaxaca       | MEXICO | 38      |
| <i>Lutzomyia</i>   | <i>texana</i>      | Santa Engracia            | -99.2000000000 | 24.0166667000 | Tamaulipas   | MEXICO | 43      |
| <i>Lutzomyia</i>   | <i>cruciata</i>    | Santa Engracia            | -99.2000000000 | 24.0166667000 | Tamaulipas   | MEXICO | 43      |
| <i>Brumptomyia</i> | <i>mesai</i>       | Santa Isabel              | -88.0961111111 | 19.4700000000 | Quintana Roo | MEXICO | 64      |
| <i>Brumptomyia</i> | <i>hamata</i>      | Santa Isabel              | -88.0961111111 | 19.4700000000 | Quintana Roo | MEXICO | 64      |

|                    |                      |                 |                 |               |              |        |    |
|--------------------|----------------------|-----------------|-----------------|---------------|--------------|--------|----|
| <i>Lutzomyia</i>   | <i>carpenteri</i>    | Santa Isabel    | -88.0961111111  | 19.4700000000 | Quintana Roo | MEXICO | 64 |
| <i>Lutzomyia</i>   | <i>deleoni</i>       | Santa Isabel    | -88.0961111111  | 19.4700000000 | Quintana Roo | MEXICO | 64 |
| <i>Lutzomyia</i>   | <i>olmeca</i>        | Santa Isabel    | -88.0961111111  | 19.4700000000 | Quintana Roo | MEXICO | 64 |
| <i>Lutzomyia</i>   | <i>shannoni</i>      | Santa Isabel    | -88.0961111111  | 19.4700000000 | Quintana Roo | MEXICO | 64 |
| <i>Lutzomyia</i>   | <i>trinidadensis</i> | Santa Isabel    | -88.0961111111  | 19.4700000000 | Quintana Roo | MEXICO | 64 |
| <i>Lutzomyia</i>   | <i>undulata</i>      | Santa Isabel    | -88.0961111111  | 19.4700000000 | Quintana Roo | MEXICO | 64 |
| <i>Lutzomyia</i>   | <i>cruciata</i>      | Santa Isabel    | -88.0961111111  | 19.4700000000 | Quintana Roo | MEXICO | 64 |
| <i>Lutzomyia</i>   | <i>vexator</i>       | Santa Margarita | -120.6090583333 | 35.3899611111 | California   | USA    | 8  |
| <i>Brumptomyia</i> | <i>mesai</i>         | Ta              | -93.3750000000  | 16.7625000000 | Chiapas      | MEXICO | 32 |
| <i>Lutzomyia</i>   | <i>deleoni</i>       | Santa Maria     | -93.3750000000  | 16.7625000000 | Chiapas      | MEXICO | 32 |
| <i>Lutzomyia</i>   | <i>olmeca</i>        | Santa Maria     | -93.8266700000  | 16.9186100000 | Chiapas      | MEXICO | 40 |
| <i>Lutzomyia</i>   | <i>shannoni</i>      | Santa Maria     | -93.8266700000  | 16.9186100000 | Chiapas      | MEXICO | 40 |
| <i>Lutzomyia</i>   | <i>cratifer</i>      | Santa Maria     | -93.7216670000  | 16.6946666667 | Chiapas      | MEXICO | 47 |

|                  |                      |                               |                |               |                  |        |            |
|------------------|----------------------|-------------------------------|----------------|---------------|------------------|--------|------------|
| <i>Lutzomyia</i> | <i>beltrani</i>      | Santa Maria                   | -93.7216670000 | 16.6946666667 | Chiapas          | MEXICO | 46         |
| <i>Lutzomyia</i> | <i>deleoni</i>       | Santa Maria                   | -93.7216670000 | 16.6946666667 | Chiapas          | MEXICO | 46         |
| <i>Lutzomyia</i> | <i>cruciata</i>      | Santa Maria                   | -93.8266700000 | 16.9186100000 | Chiapas          | MEXICO | 105        |
| <i>Lutzomyia</i> | <i>undulata</i>      | Santa Maria Huatulco          | -93.3750000000 | 16.7625000000 | Oaxaca           | MEXICO | 98         |
| <i>Lutzomyia</i> | <i>cruciata</i>      | Santa Maria Xadani            | -96.0411111111 | 16.0161111111 | Oaxaca           | MEXICO | 43         |
| <i>Lutzomyia</i> | <i>olmeca</i>        | Santiago Jalahui<br>(Xalahui) | -95.7700666667 | 17.4526222222 | Oaxaca           | MEXICO | 40         |
| <i>Lutzomyia</i> | <i>cruciata</i>      | Santiago Jalahui<br>(Xalahui) | -95.7700666667 | 17.4526222222 | Oaxaca           | MEXICO | 43         |
| <i>Lutzomyia</i> | <i>shannoni</i>      | Santo Domingo<br>Tehuantepec  | -95.2409166667 | 16.3195944444 | Oaxaca           | MEXICO | 47         |
| <i>Lutzomyia</i> | <i>bispinosa</i>     | Sayab Camp                    | -88.9666667000 | 17.1000000000 | Distrito el Cayo | BELIZE | 53         |
| <i>Lutzomyia</i> | <i>panamensis</i>    | Sayab Camp                    | -88.9666667000 | 17.1000000000 | Distrito el Cayo | BELIZE | 53         |
| <i>Lutzomyia</i> | <i>ylephiletor</i>   | Sayab Camp                    | -88.9666667000 | 17.1000000000 | Distrito el Cayo | BELIZE | 53         |
| <i>Lutzomyia</i> | <i>trinidadensis</i> | Sayab Camp                    | -88.9666667000 | 17.1000000000 | Distrito el Cayo | BELIZE | 53         |
| <i>Lutzomyia</i> | <i>shannoni</i>      | Sayab Camp                    | -88.9666667000 | 17.1000000000 | Distrito el Cayo | BELIZE | 53, 57, 99 |

|                    |                      |            |                 |               |                  |        |        |
|--------------------|----------------------|------------|-----------------|---------------|------------------|--------|--------|
| <i>Lutzomyia</i>   | <i>ovallesi</i>      | Sayab Camp | -88.9666667000  | 17.1000000000 | Distrito el Cayo | BELIZE | 53     |
| <i>Lutzomyia</i>   | <i>permira</i>       | Sayab Camp | -88.9666667000  | 17.1000000000 | Distrito el Cayo | BELIZE | 57, 99 |
| <i>Lutzomyia</i>   | <i>olmeca</i>        | Sayab Camp | -88.9666667000  | 17.1000000000 | Distrito el Cayo | BELIZE | 57, 99 |
| <i>Lutzomyia</i>   | <i>deleoni</i>       | Sayab Camp | -88.9666667000  | 17.1000000000 | Distrito el Cayo | BELIZE | 103    |
| <i>Lutzomyia</i>   | <i>cruciata</i>      | Sayab Camp | -88.9666667000  | 17.1000000000 | Distrito el Cayo | BELIZE | 53     |
| <i>Brumptomyia</i> | <i>mesai</i>         | Seye       | -89.3705444444  | 20.8371805556 | Yucatan          | MEXICO | 84     |
| <i>Lutzomyia</i>   | <i>cruciata</i>      | Seye       | -89.3705444444  | 20.8371805556 | Yucatan          | MEXICO | 84     |
| <i>Lutzomyia</i>   | <i>californica</i>   | Shafter    | -119.2717750000 | 35.5010000000 | California       | USA    | 8      |
| <i>Lutzomyia</i>   | <i>panamensis</i>    | Sibun Camp | -88.6556777778  | 17.1318805556 | Distrito el Cayo | BELIZE | 57     |
| <i>Lutzomyia</i>   | <i>trinidadensis</i> | Sibun Camp | -88.6556777778  | 17.1318805556 | Distrito el Cayo | BELIZE | 57     |
| <i>Lutzomyia</i>   | <i>shannoni</i>      | Sibun Camp | -88.6556777778  | 17.1318805556 | Distrito el Cayo | BELIZE | 57     |
| <i>Lutzomyia</i>   | <i>ovallesi</i>      | Sibun Camp | -88.6556777778  | 17.1318805556 | Distrito el Cayo | BELIZE | 57     |
| <i>Lutzomyia</i>   | <i>bispinosa</i>     | Sibun Camp | -88.6556777778  | 17.1318805556 | Distrito el Cayo | BELIZE | 103    |

|                    |                    |                      |                 |               |                  |           |          |
|--------------------|--------------------|----------------------|-----------------|---------------|------------------|-----------|----------|
| <i>Lutzomyia</i>   | <i>ylephiletor</i> | Sibun Camp           | -88.6556777778  | 17.1318805556 | Distrito el Cayo | BELIZE    | 103      |
| <i>Lutzomyia</i>   | <i>cruciata</i>    | Sibun Camp           | -88.6556777778  | 17.1318805556 | Distrito el Cayo | BELIZE    | 57       |
| <i>Lutzomyia</i>   | <i>shannoni</i>    | Sierra de Santa Cruz | -89.2500000000  | 15.6666111111 | Izabal           | GUATEMALA | 77       |
| <i>Lutzomyia</i>   | <i>olmeca</i>      | Sierra de Santa Cruz | -89.2500000000  | 15.6666111111 | Izabal           | GUATEMALA | 77       |
| <i>Lutzomyia</i>   | <i>ylephiletor</i> | Sierra de Santa Cruz | -89.2500000000  | 15.6666111111 | Izabal           | GUATEMALA | 77       |
| <i>Lutzomyia</i>   | <i>bispinosa</i>   | Sierra de Santa Cruz | -89.2500000000  | 15.6666111111 | Izabal           | GUATEMALA | 77       |
| <i>Lutzomyia</i>   | <i>panamensis</i>  | Sierra de Santa Cruz | -89.2500000000  | 15.6666111111 | Izabal           | GUATEMALA | 77       |
| <i>Lutzomyia</i>   | <i>cruciata</i>    | Sierra de Santa Cruz | -89.2500000000  | 15.6666111111 | Izabal           | GUATEMALA | 77       |
| <i>Lutzomyia</i>   | <i>anthophora</i>  | Sinton               | -97.5091611111  | 28.0367611111 | Texas            | USA       | 104, 105 |
| <i>Lutzomyia</i>   | <i>vexator</i>     | Skalkhado            | -114.1596638889 | 46.2482722222 | Montana          | USA       | 9        |
| <i>Lutzomyia</i>   | <i>permira</i>     | Soccoths             | -88.9962138889  | 17.0810277778 | Distrito el Cayo | BELIZE    | 53, 57   |
| <i>Lutzomyia</i>   | <i>deleoni</i>     | Solferino            | -87.4062067276  | 21.3452542917 | Quintana Roo     | MEXICO    | 58       |
| <i>Brumptomyia</i> | <i>mesai</i>       | Solferino            | -87.4062067276  | 21.3452542917 | Quintana Roo     | MEXICO    | 58       |

|                    |                      |           |                |               |              |        |    |
|--------------------|----------------------|-----------|----------------|---------------|--------------|--------|----|
| <i>Brumptomyia</i> | <i>hamata</i>        | Solferino | -87.4062067276 | 21.3452542917 | Quintana Roo | MEXICO | 58 |
| <i>Lutzomyia</i>   | <i>olmeca</i>        | Solferino | -87.4062067276 | 21.3452542917 | Quintana Roo | MEXICO | 58 |
| <i>Lutzomyia</i>   | <i>panamensis</i>    | Solferino | -87.4062067276 | 21.3452542917 | Quintana Roo | MEXICO | 58 |
| <i>Lutzomyia</i>   | <i>shannoni</i>      | Solferino | -87.4062067276 | 21.3452542917 | Quintana Roo | MEXICO | 58 |
| <i>Lutzomyia</i>   | <i>steatopyga</i>    | Solferino | -87.4062067276 | 21.3452542917 | Quintana Roo | MEXICO | 58 |
| <i>Lutzomyia</i>   | <i>trinidadensis</i> | Solferino | -87.4062067276 | 21.3452542917 | Quintana Roo | MEXICO | 58 |
| <i>Lutzomyia</i>   | <i>undulata</i>      | Solferino | -87.4062067276 | 21.3452542917 | Quintana Roo | MEXICO | 58 |
| <i>Brumptomyia</i> | <i>mesai</i>         | Solferino | -87.3987027189 | 21.3342313444 | Quintana Roo | MEXICO | 58 |
| <i>Brumptomyia</i> | <i>hamata</i>        | Solferino | -87.3987027189 | 21.3342313444 | Quintana Roo | MEXICO | 58 |
| <i>Lutzomyia</i>   | <i>cayennensis</i>   | Solferino | -87.3987027189 | 21.3342313444 | Quintana Roo | MEXICO | 58 |
| <i>Lutzomyia</i>   | <i>deleoni</i>       | Solferino | -87.3987027189 | 21.3342313444 | Quintana Roo | MEXICO | 58 |
| <i>Lutzomyia</i>   | <i>olmeca</i>        | Solferino | -87.3987027189 | 21.3342313444 | Quintana Roo | MEXICO | 58 |
| <i>Lutzomyia</i>   | <i>shannoni</i>      | Solferino | -87.3987027189 | 21.3342313444 | Quintana Roo | MEXICO | 58 |

|                    |                     |              |                |               |                              |           |        |
|--------------------|---------------------|--------------|----------------|---------------|------------------------------|-----------|--------|
| <i>Lutzomyia</i>   | <i>steatopyga</i>   | Solferino    | -87.3987027189 | 21.3342313444 | Quintana Roo                 | MEXICO    | 58     |
| <i>Lutzomyia</i>   | <i>cruciata</i>     | Solferino    | -87.4062067276 | 21.3452542917 | Quintana Roo                 | MEXICO    | 58     |
| <i>Lutzomyia</i>   | <i>cruciata</i>     | Solferino    | -87.3987027189 | 21.3342313444 | Quintana Roo                 | MEXICO    | 58     |
| <i>Lutzomyia</i>   | <i>deleoni</i>      | Solidaridad  | -88.3052777778 | 18.5036111111 | Quintana Roo                 | MEXICO    | 38     |
| <i>Lutzomyia</i>   | <i>olmeca</i>       | Solidaridad  | -88.3052777778 | 18.5036111111 | Quintana Roo                 | MEXICO    | 40     |
| <i>Lutzomyia</i>   | <i>shannoni</i>     | Solidaridad  | -88.3052777778 | 18.5036111111 | Quintana Roo                 | MEXICO    | 40     |
| <i>Lutzomyia</i>   | <i>cruciata</i>     | Solola       | -91.1833333333 | 14.7666250000 | Solola                       | GUATEMALA | 43     |
| <i>Brumptomyia</i> | <i>hamata</i>       | Sontecomapan | -95.0355600000 | 18.5041700000 | Veracruz Ignacio de la Llave | MEXICO    | 22     |
| <i>Lutzomyia</i>   | <i>deleoni</i>      | Sontecomapan | -95.0355600000 | 18.5041700000 | Veracruz Ignacio de la Llave | MEXICO    | 22, 45 |
| <i>Lutzomyia</i>   | <i>panamensis</i>   | Sontecomapan | -95.0355600000 | 18.5041700000 | Veracruz Ignacio de la Llave | MEXICO    | 22     |
| <i>Brumptomyia</i> | <i>mesai</i>        | Sontecomapan | -95.0355600000 | 18.5041700000 | Veracruz Ignacio de la Llave | MEXICO    | 38, 43 |
| <i>Lutzomyia</i>   | <i>chiapanensis</i> | Soyacuatla   | -96.5777777778 | 19.5747222222 | Veracruz Ignacio de la Llave | MEXICO    | 51     |
| <i>Lutzomyia</i>   | <i>longipalpis</i>  | Soyacuatla   | -96.5777777778 | 19.5747222222 | Veracruz Ignacio de la Llave | MEXICO    | 51     |

|                  |                   |                    |                |               |                              |        |        |
|------------------|-------------------|--------------------|----------------|---------------|------------------------------|--------|--------|
| <i>Lutzomyia</i> | <i>texana</i>     | Soyacuatla         | -96.5777777778 | 19.5747222222 | Veracruz Ignacio de la Llave | MEXICO | 51     |
| <i>Lutzomyia</i> | <i>cruciata</i>   | Soyacuatla         | -96.5777777778 | 19.5747222222 | Veracruz Ignacio de la Llave | MEXICO | 51     |
| <i>Lutzomyia</i> | <i>panamensis</i> | Spanish Lookout    | -89.0280556000 | 17.3052778000 | Distrito el Cayo             | BELIZE | 57, 99 |
| <i>Lutzomyia</i> | <i>olmeca</i>     | Spanish Lookout    | -89.0280556000 | 17.3052778000 | Distrito el Cayo             | BELIZE | 57, 99 |
| <i>Lutzomyia</i> | <i>shannoni</i>   | Spanish Lookout    | -89.0280556000 | 17.3052778000 | Distrito el Cayo             | BELIZE | 57, 99 |
| <i>Lutzomyia</i> | <i>ovallesi</i>   | Spanish Lookout    | -89.0280556000 | 17.3052778000 | Distrito el Cayo             | BELIZE | 57, 99 |
| <i>Lutzomyia</i> | <i>cruciata</i>   | Spanish Lookout    | -89.0280556000 | 17.3052778000 | Distrito el Cayo             | BELIZE | 103    |
| <i>Lutzomyia</i> | <i>shannoni</i>   | Spanish Water Hole | -89.0833333333 | 16.8999416667 | Distrito el Cayo             | BELIZE | 57     |
| <i>Lutzomyia</i> | <i>deleoni</i>    | Spanish Water Hole | -89.0833333333 | 16.8999416667 | Distrito el Cayo             | BELIZE | 103    |
| <i>Lutzomyia</i> | <i>diabolica</i>  | Stacy Ranch        | -99.1013500000 | 28.8303111111 | Texas                        | USA    | 78     |
| <i>Lutzomyia</i> | <i>anthophora</i> | Stacy Ranch        | -99.1013500000 | 28.8303111111 | Texas                        | USA    | 78     |
| <i>Lutzomyia</i> | <i>shannoni</i>   | Stewart            | -87.7763333333 | 36.0517500000 | Tennessee                    | USA    | 67     |
| <i>Lutzomyia</i> | <i>vexator</i>    | Stewart            | -87.7763333333 | 36.0517500000 | Tennessee                    | USA    | 67     |

|                  |                    |                                  |                 |               |                 |        |         |
|------------------|--------------------|----------------------------------|-----------------|---------------|-----------------|--------|---------|
| <i>Lutzomyia</i> | <i>vexator</i>     | Strawberry Canyon                | -122.2008302778 | 37.7484916667 | California      | USA    | 8, 31   |
| <i>Lutzomyia</i> | <i>californica</i> | Suprestitions Mountains          | -111.2392861111 | 33.4782027778 | Arizona         | USA    | 105     |
| <i>Lutzomyia</i> | <i>vexator</i>     | Sussex                           | -74.6076611111  | 41.2098166667 | New Jersey      | USA    | 76      |
| <i>Lutzomyia</i> | <i>shannoni</i>    | Suwanne National Wildlife Refuge | -82.9227361111  | 29.4784444444 | Florida         | USA    | 34      |
| <i>Lutzomyia</i> | <i>vexator</i>     | Suwanne National Wildlife Refuge | -82.9227361111  | 29.4784444444 | Florida         | USA    | 34      |
| <i>Lutzomyia</i> | <i>cruciata</i>    | Tamazunchale                     | -98.7833333000  | 21.2666667000 | San Luis Potosi | MEXICO | 43, 105 |
| <i>Lutzomyia</i> | <i>texana</i>      | Taniche                          | -96.7527777778  | 16.5658333333 | Oaxaca          | MEXICO | 38      |
| <i>Lutzomyia</i> | <i>cruciata</i>    | Tapachula                        | -92.2605600000  | 14.9080600000 | Chiapas         | MEXICO | 105     |
| <i>Lutzomyia</i> | <i>olmeca</i>      | Teapa                            | -92.9533250000  | 17.5504694444 | Tabasco         | MEXICO | 98      |
| <i>Lutzomyia</i> | <i>ylephiletor</i> | Teapa                            | -92.9533250000  | 17.5504694444 | Tabasco         | MEXICO | 32      |
| <i>Lutzomyia</i> | <i>cruciata</i>    | Teapa                            | -92.9533250000  | 17.5504694444 | Tabasco         | MEXICO | 43, 105 |
| <i>Lutzomyia</i> | <i>cruciata</i>    | Teotihuacan del Valle            | -92.2640277778  | 14.9999166667 | Chiapas         | MEXICO | 66      |
| <i>Lutzomyia</i> | <i>serrana</i>     | Tepozal                          | -105.0661100000 | 21.3872200000 | Nayarit         | MEXICO | 43      |

|                  |                    |                       |                 |               |                              |        |    |
|------------------|--------------------|-----------------------|-----------------|---------------|------------------------------|--------|----|
| <i>Lutzomyia</i> | <i>shannoni</i>    | Tepozal               | -105.0661100000 | 21.3872200000 | Nayarit                      | MEXICO | 47 |
| <i>Lutzomyia</i> | <i>cruciata</i>    | Tepozal               | -105.0661100000 | 21.3872200000 | Nayarit                      | MEXICO | 43 |
| <i>Lutzomyia</i> | <i>longipalpis</i> | Tequesquitengo        | -99.2597200000  | 18.6111100000 | Morelos                      | MEXICO | 43 |
| <i>Lutzomyia</i> | <i>cruciata</i>    | Texin                 | -96.9961110000  | 19.3680560000 | Veracruz Ignacio de la Llave | MEXICO | 51 |
| <i>Lutzomyia</i> | <i>shannoni</i>    | Tishomingo State Park | -88.2317111111  | 34.6367611111 | Mississippi                  | USA    | 39 |
| <i>Lutzomyia</i> | <i>cruciata</i>    | Toma de Agua          | -96.6663888889  | 15.8872222222 | Oaxaca                       | MEXICO | 38 |
| <i>Lutzomyia</i> | <i>deleoni</i>     | Tomas Garrido         | -89.0602698348  | 18.0623525942 | Quintana Roo                 | MEXICO | 70 |
| <i>Lutzomyia</i> | <i>steatopyga</i>  | Tomas Garrido         | -89.0602698348  | 18.0623525942 | Quintana Roo                 | MEXICO | 70 |
| <i>Lutzomyia</i> | <i>olmeca</i>      | Tomas Garrido         | -89.0602698348  | 18.0623525942 | Quintana Roo                 | MEXICO | 70 |
| <i>Lutzomyia</i> | <i>ovallesi</i>    | Tomas Garrido         | -89.0602698348  | 18.0623525942 | Quintana Roo                 | MEXICO | 70 |
| <i>Lutzomyia</i> | <i>panamensis</i>  | Tomas Garrido         | -89.0602698348  | 18.0623525942 | Quintana Roo                 | MEXICO | 70 |
| <i>Lutzomyia</i> | <i>shannoni</i>    | Tomas Garrido         | -89.0602698348  | 18.0623525942 | Quintana Roo                 | MEXICO | 70 |
| <i>Lutzomyia</i> | <i>cruciata</i>    | Tomas Garrido         | -89.0602698348  | 18.0623525942 | Quintana Roo                 | MEXICO | 70 |

|                    |                   |                    |                 |               |                |           |          |
|--------------------|-------------------|--------------------|-----------------|---------------|----------------|-----------|----------|
| <i>Lutzomyia</i>   | <i>cruciata</i>   | Tonagua            | -96.0325000000  | 17.3322222222 | Oaxaca         | MEXICO    | 40       |
| <i>Lutzomyia</i>   | <i>vexator</i>    | Topaz Lake         | -119.5397722222 | 38.6749527778 | California     | USA       | 8, 31    |
| <i>Lutzomyia</i>   | <i>shannoni</i>   | Torrega State Park | -84.8567166667  | 30.1507444444 | Florida        | USA       | 104, 105 |
| <i>Lutzomyia</i>   | <i>cruciata</i>   | Trece Aguas        | -89.4403000000  | 16.1988416667 | Peten          | GUATEMALA | 17, 57   |
| <i>Lutzomyia</i>   | <i>shannoni</i>   | Trenton            | -77.3561111111  | 35.0635750000 | North Caroline | USA       | 105      |
| <i>Lutzomyia</i>   | <i>deleoni</i>    | Tres Garantias     | -87.4062067276  | 21.3452542917 | Quintana Roo   | MEXICO    | 58       |
| <i>Brumptomyia</i> | <i>mesai</i>      | Tres Garantias     | -87.4062067276  | 21.3452542917 | Quintana Roo   | MEXICO    | 58       |
| <i>Lutzomyia</i>   | <i>olmeca</i>     | Tres Garantias     | -87.4062067276  | 21.3452542917 | Quintana Roo   | MEXICO    | 58       |
| <i>Lutzomyia</i>   | <i>panamensis</i> | Tres Garantias     | -87.4062067276  | 21.3452542917 | Quintana Roo   | MEXICO    | 58       |
| <i>Lutzomyia</i>   | <i>shannoni</i>   | Tres Garantias     | -87.4062067276  | 21.3452542917 | Quintana Roo   | MEXICO    | 58       |
| <i>Lutzomyia</i>   | <i>ovallesi</i>   | Tres Garantias     | -87.4062067276  | 21.3452542917 | Quintana Roo   | MEXICO    | 58       |
| <i>Lutzomyia</i>   | <i>undulata</i>   | Tres Garantias     | -87.4062067276  | 21.3452542917 | Quintana Roo   | MEXICO    | 58       |
| <i>Lutzomyia</i>   | <i>carpenteri</i> | Tres Garantias     | -89.0445104588  | 18.2138640187 | Quintana Roo   | MEXICO    | 58       |

|                  |                   |                |                |               |              |        |    |
|------------------|-------------------|----------------|----------------|---------------|--------------|--------|----|
| <i>Lutzomyia</i> | <i>deleoni</i>    | Tres Garantias | -89.0445104588 | 18.2138640187 | Quintana Roo | MEXICO | 58 |
| <i>Lutzomyia</i> | <i>olmeca</i>     | Tres Garantias | -89.0445104588 | 18.2138640187 | Quintana Roo | MEXICO | 58 |
| <i>Lutzomyia</i> | <i>ovallesi</i>   | Tres Garantias | -89.0445104588 | 18.2138640187 | Quintana Roo | MEXICO | 58 |
| <i>Lutzomyia</i> | <i>panamensis</i> | Tres Garantias | -89.0445104588 | 18.2138640187 | Quintana Roo | MEXICO | 58 |
| <i>Lutzomyia</i> | <i>permira</i>    | Tres Garantias | -89.0445104588 | 18.2138640187 | Quintana Roo | MEXICO | 58 |
| <i>Lutzomyia</i> | <i>shannoni</i>   | Tres Garantias | -89.0445104588 | 18.2138640187 | Quintana Roo | MEXICO | 58 |
| <i>Lutzomyia</i> | <i>steatopyga</i> | Tres Garantias | -89.0445104588 | 18.2138640187 | Quintana Roo | MEXICO | 58 |
| <i>Lutzomyia</i> | <i>cruciata</i>   | Tres Garantias | -87.4062067276 | 21.3452542917 | Quintana Roo | MEXICO | 58 |
| <i>Lutzomyia</i> | <i>cruciata</i>   | Tres Garantias | -89.0445104588 | 18.2138640187 | Quintana Roo | MEXICO | 58 |
| <i>Lutzomyia</i> | <i>shannoni</i>   | Tres Rios      | -96.6911100000 | 15.8766700000 | Oaxaca       | MEXICO | 47 |
| <i>Lutzomyia</i> | <i>cruciata</i>   | Tres Rios      | -96.6911100000 | 15.8766700000 | Oaxaca       | MEXICO | 38 |
| <i>Lutzomyia</i> | <i>shannoni</i>   | Trigg          | -87.7763333333 | 36.8473638889 | Kentucky     | USA    | 67 |
| <i>Lutzomyia</i> | <i>vexator</i>    | Trigg          | -87.7763333333 | 36.8473638889 | Kentucky     | USA    | 67 |

|                  |                    |                        |                 |               |                              |        |      |
|------------------|--------------------|------------------------|-----------------|---------------|------------------------------|--------|------|
| <i>Lutzomyia</i> | <i>serrana</i>     | Tulin                  | -94.9563888889  | 18.2388888888 | Veracruz Ignacio de la Llave | MEXICO | 51   |
| <i>Lutzomyia</i> | <i>shannoni</i>    | Tulin                  | -94.9563888889  | 18.2388888888 | Veracruz Ignacio de la Llave | MEXICO | 51   |
| <i>Lutzomyia</i> | <i>shannoni</i>    | Tumbo Madedero         | -90.7904930000  | 18.5999910000 | Campeche                     | MEXICO | 3, 4 |
| <i>Lutzomyia</i> | <i>panamensis</i>  | Tumbo Madedero         | -90.7904930000  | 18.5999910000 | Campeche                     | MEXICO | 3, 4 |
| <i>Lutzomyia</i> | <i>cruciata</i>    | Tumbo Madedero         | -90.7904930000  | 18.5999910000 | Campeche                     | MEXICO | 3, 4 |
| <i>Lutzomyia</i> | <i>longipalpis</i> | Tuxtla Gutierrez       | -93.1166666667  | 16.7500138889 | Chiapas                      | MEXICO | 32   |
| <i>Lutzomyia</i> | <i>cayennensis</i> | Tuzales                | -96.1000000000  | 18.7811111111 | Veracruz Ignacio de la Llave | MEXICO | 51   |
| <i>Lutzomyia</i> | <i>deleoni</i>     | Tuzik                  | -88.1678613955  | 19.9168103554 | Quintana Roo                 | MEXICO | 70   |
| <i>Lutzomyia</i> | <i>steatopyga</i>  | Tuzik                  | -88.1678613955  | 19.9168103554 | Quintana Roo                 | MEXICO | 70   |
| <i>Lutzomyia</i> | <i>shannoni</i>    | Tuzik                  | -88.1678613955  | 19.9168103554 | Quintana Roo                 | MEXICO | 70   |
| <i>Lutzomyia</i> | <i>cruciata</i>    | Tuzik                  | -88.1678613955  | 19.9168103554 | Quintana Roo                 | MEXICO | 70   |
| <i>Lutzomyia</i> | <i>stewarti</i>    | UC Hopland Field Saint | -123.1142111111 | 38.9706777778 | California                   | USA    | 8    |
| <i>Lutzomyia</i> | <i>vexator</i>     | UC Hopland Field Saint | -123.1142111111 | 38.9706777778 | California                   | USA    | 8    |

|                  |                      |                     |                 |               |              |        |               |
|------------------|----------------------|---------------------|-----------------|---------------|--------------|--------|---------------|
| <i>Lutzomyia</i> | <i>cayennensis</i>   | Uh-May              | -88.0486111111  | 19.4166666667 | Quintana Roo | MEXICO | 18            |
| <i>Lutzomyia</i> | <i>shannoni</i>      | Uh-May              | -88.0486111111  | 19.4166666667 | Quintana Roo | MEXICO | 18            |
| <i>Lutzomyia</i> | <i>deleoni</i>       | Uh-May              | -88.0486111111  | 19.4166666667 | Quintana Roo | MEXICO | 18            |
| <i>Lutzomyia</i> | <i>olmeca</i>        | Uh-May              | -88.0486111111  | 19.4166666667 | Quintana Roo | MEXICO | 18            |
| <i>Lutzomyia</i> | <i>panamensis</i>    | Uh-May              | -88.0486111111  | 19.4166666667 | Quintana Roo | MEXICO | 18            |
| <i>Lutzomyia</i> | <i>trinidadensis</i> | Uh-May              | -88.0486111111  | 19.4166666667 | Quintana Roo | MEXICO | 18            |
| <i>Lutzomyia</i> | <i>cruciata</i>      | Uh-May              | -88.0486111111  | 19.4166666667 | Quintana Roo | MEXICO | 18            |
| <i>Lutzomyia</i> | <i>stewarti</i>      | Ukiah               | -123.2077833333 | 39.1501722222 | California   | USA    | 105           |
| <i>Lutzomyia</i> | <i>californica</i>   | Ukiah               | -123.2077833333 | 39.1501722222 | California   | USA    | 8             |
| <i>Lutzomyia</i> | <i>anthophora</i>    | Uvalde              | -99.7861666667  | 29.2096833333 | Texas        | USA    | 1, 104, 105   |
| <i>Lutzomyia</i> | <i>diabolica</i>     | Uvalde              | -99.7861666667  | 29.2096833333 | Texas        | USA    | 1, 23, 27, 43 |
| <i>Lutzomyia</i> | <i>shannoni</i>      | Valentine Lake      | -92.6853416667  | 31.2425944444 | Louisiana    | USA    | 87            |
| <i>Lutzomyia</i> | <i>deleoni</i>       | Veinte de Noviembre | -89.4608333300  | 18.0913888900 | Campeche     | MEXICO | 83            |

|                    |                   |                        |                 |               |            |        |          |
|--------------------|-------------------|------------------------|-----------------|---------------|------------|--------|----------|
| <i>Brumptomyia</i> | <i>mesai</i>      | Veinte de Noviembre    | -89.4608333300  | 18.0913888900 | Campeche   | MEXICO | 83       |
| <i>Lutzomyia</i>   | <i>olmeca</i>     | Veinte de Noviembre    | -89.4608333300  | 18.0913888900 | Campeche   | MEXICO | 83       |
| <i>Lutzomyia</i>   | <i>ovallesi</i>   | Veinte de Noviembre    | -89.4608333300  | 18.0913888900 | Campeche   | MEXICO | 83       |
| <i>Lutzomyia</i>   | <i>panamensis</i> | Veinte de Noviembre    | -89.4608333300  | 18.0913888900 | Campeche   | MEXICO | 83       |
| <i>Lutzomyia</i>   | <i>shannoni</i>   | Veinte de Noviembre    | -89.4608333300  | 18.0913888900 | Campeche   | MEXICO | 83       |
| <i>Lutzomyia</i>   | <i>permira</i>    | Veinte de Noviembre    | -89.4608333300  | 18.0913888900 | Campeche   | MEXICO | 83       |
| <i>Lutzomyia</i>   | <i>cruciata</i>   | Veinte de Noviembre    | -89.4608333300  | 18.0913888900 | Campeche   | MEXICO | 83       |
| <i>Lutzomyia</i>   | <i>shannoni</i>   | Vergel                 | -97.5705555550  | 16.8721805556 | Oaxaca     | MEXICO | 38       |
| <i>Lutzomyia</i>   | <i>cruciata</i>   | Vistahermosa           | -96.3277800000  | 17.6347200000 | Oaxaca     | MEXICO | 40       |
| <i>Lutzomyia</i>   | <i>shannoni</i>   | Wakula Springs         | -84.3051750000  | 30.2335361111 | Florida    | USA    | 104, 105 |
| <i>Lutzomyia</i>   | <i>vexator</i>    | Walnut Creek           | -122.0650222222 | 37.9062666667 | California | USA    | 8        |
| <i>Lutzomyia</i>   | <i>shannoni</i>   | Waycross               | -82.3540166667  | 31.2135500000 | Georgia    | USA    | 105      |
| <i>Lutzomyia</i>   | <i>texana</i>     | Welder Wildlife Refuge | -97.7719416667  | 27.9543305556 | Texas      | USA    | 104, 105 |

|                  |                    |                  |                 |               |                              |           |        |
|------------------|--------------------|------------------|-----------------|---------------|------------------------------|-----------|--------|
| <i>Lutzomyia</i> | <i>californica</i> | Wendel           | -120.2335472222 | 40.3482361111 | California                   | USA       | 8      |
| <i>Lutzomyia</i> | <i>shannoni</i>    | West Feliciana   | -91.4048250000  | 30.8433361111 | Louisiana                    | USA       | 87     |
| <i>Lutzomyia</i> | <i>shannoni</i>    | Wilmington       | -75.5466666667  | 39.7456027778 | Delaware                     | USA       | 105    |
| <i>Lutzomyia</i> | <i>vexator</i>     | Woodside         | -122.2537972222 | 37.4296055556 | California                   | USA       | 8      |
| <i>Lutzomyia</i> | <i>longipalpis</i> | Zacapa           | -89.5333333333  | 14.9666944444 | Zacapa                       | GUATEMALA | 57     |
| <i>Lutzomyia</i> | <i>cruciata</i>    | Zamora Caletón   | -95.4830555556  | 18.5797222220 | Veracruz Ignacio de la Llave | MEXICO    | 38     |
| <i>Lutzomyia</i> | <i>beltrani</i>    | Zapotlán         | -94.3036100000  | 17.8583300000 | Veracruz Ignacio de la Llave | MEXICO    | 46     |
| <i>Lutzomyia</i> | <i>olmeca</i>      | Zapotlán         | -94.3036100000  | 17.8583300000 | Veracruz Ignacio de la Llave | MEXICO    | 38, 47 |
| <i>Lutzomyia</i> | <i>shannoni</i>    | Zapotlán         | -94.3036100000  | 17.8583300000 | Veracruz Ignacio de la Llave | MEXICO    | 38     |
| <i>Lutzomyia</i> | <i>cruciata</i>    | Zongolica        | -96.9986111111  | 18.6647222222 | Veracruz Ignacio de la Llave | MEXICO    | 38     |
| <i>Lutzomyia</i> | <i>cayennensis</i> | Zumpango del Río | -98.6838305556  | 17.9324611111 | Guerrero                     | MEXICO    | 28     |

# REFERENCES

1. **Addis, C. 1945.** *Phlebotomus (Dampfomyia) anthophorus*, n.sp., and *Phlebotomus diabolicus* Hall from Texas (Diptera: Psychodidae). *The Journal of Parasitology*. **31**: 119-127.
2. **Aitken, T., AJ. Main and D. Young. 1977.** *Lutzomyia vexator* (Coquillett) in Connecticut (Diptera: Psychodidae). *Proceedings of the Entomological Society of Washington*. **79**: 582-582.
3. **Biagi, F. and A. de Buen de Biagi. 1953a.** Datos ecológicos de algunos flebotomus mexicanos (Diptera: Psych.). *Annales del Instituto de Biología*. Tomo 24. No. 2. México.
4. **Biagi, F. and A. de Buen de Biagi. 1953b.** Algunos flebotomus del área endêmica de Leishmaniasis tegumentária Americana del Estado de Campeche, México. *Revista de Medicina*. Tomo 33. No. 679. pp 315-319. México.
5. **Biagi, F., A. de Biagi and F. Beltrán. 1965.** *Phlebotomus flaviscutellatus* , transmisor natural de Leishmania mexicana. *Prensa Médica México*. **30**: 267-272.
6. **Biagi, F., A. de Biagi, and F. Beltrán. 1966.** Actividad horaria de *Phlebotomus* antropófilos en la Península de Yucatán. *Revista de Salud Pública (México)* . **26**: 73-77.

**7. Brinson, F., D. Hagan, J. Comer and D. Strohlein. 1992.** Seasonal Abundance of *Lutzomyia shannoni* (Diptera: Psychodidae) on Ossabaw Island, Georgia. *Journal of Medical Entomology*. **29**: 178-182.

**8. Chaniotis, B. N. & Anderson, J. R. 1968.** Age structure, population dynamics and vector potential of *Phlebotomus* in northern California. Part II. Field population dynamics and natural flagellate infections in parous females. *Journal of Medical Entomology*. **5**: 273-292.

**9. Chaniotis, B. 1974.** Phlebotomine sandflies in Montana: First report. *Mosquito News*. **34**: 334-335.

**10. Claborn, D., E. Rowton, P. Lawyer, G. Brown and L. Keep. 2009.** Species diversity and relative abundance of Phlebotomine sand flies (Diptera: Psychodidae) on three army installations in the Southern United States and susceptibility of a domestic sand fly to infection with Old World *Leishmania major*. *Military Medicine*. **174**: 1203-1208.

**11. Claborn, D., P. Masuoka, M. Morroz and L. Keep. 2008.** Habitat analysis of North American sand flies near veterans returning from leishmania-endemic war zones. *International Journal of Health Geographics*. **7**: 65 doi:10.1186/1476-072X-7-65.

**12. Comer, J., D. Kavanaugh, D. Stallknecht and J. Corn. 1994a.** Population dynamics of *Lutzomyia shannoni* (Diptera: Psychodidae) in relation to the epizootiology of vesicular stomatitis virus on Ossabaw Island, Georgia. *Journal of Medical Entomology*. **31**: 850-854.

- 13. Comer, J., D. Kavanaugh, D. Stallknecht, G. Ware, J. Corn and V. Nettles. 1993.** Effect of forest type on the distribution of *Lutzomyia shannoni* (Diptera: Psychodidae) and vesicular stomatitis virus on Ossabaw Island, Georgia. *Journal of Medical Entomology*. **30**: 555-560.
- 14. Comer, J. and J. Corn. 1991.** Funnel trap for the capture of Phlebotomine Sand flies (Diptera: Psychodidae) from Tree Holes. *Journal of Medical Entomology*. **28**: 289-292.
- 15. Comer, J. J. Corn, D. Stallknecht, J. Landgraf and V. Nettles. 1992.** Titers of Vesicular Stomatitis virus, New Jersey Serotype, in naturally infected male and female *Lutzomyia shannoni* (Diptera: Psychodidae) in Georgia. *Journal of Medical Entomology*. **29**: 368-370.
- 16. Comer, J. W. Irby and D. Kavanaugh. 1994b.** Hosts of *Lutzomyia shannoni* (Diptera: Psychodidae) in relation to vesicular stomatitis virus on Ossabaw Island, Georgia, U.S.A. *Medical and Veterinary Entomology*. **8**: 325-330.
- 17. Coquillett, D. 1907.** Discovery of blood-sucking Psychodidae in America. *Entomological News*. **18**: 101-102.
- 18. Cruz, A., J. García, P. Manrique-Saide and J. Pérez. 1994.** Taxonomical identification of anthropophilic species of *Lutzomyia* in Quintana Roo, Yucatan Peninsula, Mexico. *Biomédica*. **5**: 127-131.

- 19. Dampf, A. 1938.** Un nuevo *Phlebotomus* (Insecta, Diptera, Fam. Psychodidae) procedente de Texas, E.U.A. *Anales de la Escuela Nacional de Ciencias Biologicas*. **1**: 1-8.
- 20. de Buen de Biagi, A. F. Beltrán and F. Biagi. 1966.** Nuevos conocimientos sobre los flebótomos del área endémica de Leishmaniasis cutánea en Yucatán. *Revista de Investigación en Salud Pública*. **26**: 139-153.
- 21. de Buen, A. 1966.** Clave para identificación rápida de las hembras de *Phlebotomus* antropófilos del área endémica de Leishmaniasis cutánea en México. *Revista de Investigación en Salud Pública*. **26**: 367-373.
- 22. Díaz-Nájera, A. 1963.** Lista de mosquitos capturados en tres localidades del estado de Veracruz, Mexico. *Revista del Instituto de Salubridad y Enfermedades Tropicales*. **23**: 187-192.
- 23. Díaz-Nájera, A. 1970.** Presencia de *Lutzomyia* (*Lutzomyia*) *diabolica* (Hall, 1936) en Muzquiz, Coahuila, México (Diptera: Psychodidae). *Revista de Investigación en Salud Pública*. **31**: 62-66.
- 24. Downes, J. 1972.** Canadian records of *Phlebotomus vexator*, *Trichomyia nuda*, and *Maruina lanceolata* (Diptera: Psychodidae). *The Canadian Entomologist*. **104**: 1135-1136.

- 25. Eads, R., H. Treviño and E. Campos. 1965.** Additional Records of *Phlebotomus texanus* . *Proceedings of the Entomological Society of Washington*. **67**: 251-252.
- 26. Easton, E., M. Price and O. Graham. 1968.** The collection of biting flies in West Texas with Malaise and Animal-baited Traps. *Mosquito News*. **28**: 465-469.
- 27. Endris, R., PV. Perkins, D. Young and R. Johnson. 1982.** Techniques for laboratory rearing of sand flies (Diptera: Psychodidae). *Mosquito News*. **42**: 400-407.
- 28. Fairchild, G. and M. Hertig. 1948.** Notes on the *Phlebotomus* of Panama (Diptera: Psychodidae) IV. *P. atroclavatus* Knab, *P. cayennensis* Floch and Abonnenc, *P. chiapanensis* Dampf and some related forms from the West Indies and Mexico. *Annals of the Entomological Society of America*. **41**: 455-467.
- 29. Fairchild, G. and M. Hertig. 1950.** Notes on the Phlebotomus of Panama (Diptera, Psychodidae). VI. *Phlebotomus shannoni* Dyar and related species. *Annals of the Entomological Society of America*. **43**: 523-533.
- 30. Fairchild, G. B. and M. Hertig. 1956.** Notes on the Phlebotomus of Panama (Diptera: Psychodidae) XII. The group anthophorus, with descriptions of four species from Panama and Mexico. *Annals of the Entomological Society of America*. **49**: 307-312.

- 31. Fairchild, G. B. and M. Hertig. 1957.** Notes on the *Phlebotomus* of panamá, XIII. The vexator group, with descriptions of new species from Panamá and california. *Annals of the Entomological Society of America* . **50**: 325-334.
- 32. Fairchild, G. B. and M. Hertig. 1959.** Geographic distribution of the phlebotomus sandflies of Central America (Diptera: Psychodidae). *Annals of the Entomological Society of America* . **52**: 121-124.
- 33. Fairchild, G.B. and R.F. Harwood. 1961.** *Phlebotomus* sandflies from animal burrows in Eastern Washington. *Proceedings of the Entomological Society of Washington*. **63**: 239-245.
- 34. Florin, D., S.J. Davis, C. Olsen, P. Lawyer, R. Lipnick, G. Schultz, E. Rowton, R. Wilkerson and L. Keep. 2011.** Morphometric and Molecular analyses of the Sand Fly Species *Lutzomyia shannoni* (Diptera: Psychodidae: Phlebotominae) collected from seven different geographical areas in the Southeastern United States. *Journal of Medical Entomology*. **48**: 154-166.
- 35. Florin, D., P. Lawyer, E. Rowton, G. Schultz, R. Wilkerson, S. Davies, R. Lipnicj and L. Keep. 2010.** Morphological anomalies in two *Lutzomyia (Psathyromyia) shannoni* (Diptera: Psychodidae) specimens collected from Fort Rucker, Alabama, and Fort Campbell, Kentucky. *Journal of Medical Entomology*. **47**: 952-956.
- 36. Galliard, H. 1934a.** Un phlebotome nouveau du Mexique: *Phlebotomus almazani* n. sp. *Annales de Parasitologie Humaine et Comparée*. **12**: 193-195.

- 37. Galliard, H. 1934b.** Un phlebotome nouveau du Mexique: *Phlebotomus yucatanensis* n. sp. *Annales de Parasitologie Humaine et Comparée*. **12**: 177-181.
- 38. Godínez-Alvarez, A. and S. Ibáñez-Bernal. 2010.** Catalogo de Psychodidae (Diptera) de la colección de artropodos con importancia médica del INDRE, Secretaria de Salud, México. *Acta Zoologica Mexicana*. **26**: 99-121.
- 39. Goddard, J. and C. McHugh. 2005.** New records for the Phlebotomine sand fly *Lutzomyia shannoni* (Dyar) (Diptera: Psychodidae) in Mississippi. *Journal of the Mississippi Academy of Sciences*. **50**: 195-196.
- 40. Gonzalez, C.** Personal collections records.
- 41. Haddow, A., G. Curler and J. Moulton. 2008.** New records of *Lutzomyia shannoni* and *Lutzomyia vexator* (Diptera: Psychodidae) in eastern Tennessee. *Journal of Vector Ecology*. **33**: 393-396.
- 42. Hall, D. 1936.** *Phlebotomus (Brumptomyia) diabolicus*, a new species of biting gnat from Texas (Diptera: Psychodidae). *Proceedings of the Entomological Society of Washington*. **38**: 27-28.

- 43. Ibáñez-Bernal, S. 1999.** Phlebotominae (Diptera: Psychodidae) de México. I.- *Brumptomyia* França y Parrot; *Lutzomyia* França, las especies de *Lutzomyia* (*Lutzomyia*) França y del grupo *verrucarum*. *Folia Entomológica Mexicana*. **107**: 61-116.
- 44. Ibáñez-Bernal, S. 2000.** Psychodidae (Diptera). In Llorente, J., E. González y N. Papavero. (Eds) pp 607-626. Biodiversidad, taxonomía y biogeografía de artrópodos de México: Hacia una síntesis de su conocimiento. Vol II. Mexico, D.F. Universidad Nacional Autónoma de México. ISBN: 968-36-8003-8.
- 45. Ibáñez-Bernal, S. 2001.** Phlebotominae (Diptera: Psychodidae) de México II.- Las especies de *Lutzomyia* (*Coromyia*) Barreto, del grupo *Delpozoi* y de *Lutzomyia* (*Dampfomyia*) Addis. *Folia Entomológica Mexicana*. **40**: 17-43.
- 46. Ibáñez-Bernal, S. 2001.** Notes on the Psychodidae (Diptera) of Belize: Subfamilies Bruchomyiinae and Phlebotominae. *Annales of the Entomological Society of America*. **94**: 367-385.
- 47. Ibáñez-Bernal, S. 2002.** Phlebotominae (Diptera: Psychodidae) de México. III. Las especies de *Lutzomyia* (*Psathyromyia*) Barreto, del grupo *Aragoi*, de *L.* (*Trichopygomyia*) Barreto, del grupo *Dreisbachi* y de *L.* (*Nyssomyia*) Barreto. *Folia Entomológica Mexicana*. **41**: 149-183.
- 48. Ibáñez-Bernal, S. 2003.** Phlebotominae (Diptera: Psychodidae) de México. IV. Las especies de *Lutzomyia* (*Psychodopygus*) Mangabeira, *L.* (*Micropygomyia*) Barretto, *Lutzomyia* grupo *Oswaldoi*, *L.* (*Helcocyrtomyia*) Barreto y especies del género sin agrupar. *Folia Entomológica Mexicana*. **42**: 109-152.

- 49. Ibáñez-Bernal, S., G. Rodríguez, C. Gómez and J. Ricardez. 2004.** First record of *Lutzomyia evansi* (Nuñez-Tovar, 1924) in Mexico (Diptera: Psychodidae, Phlebotominae). *Memorias do Instituto Oswaldo Cruz*. **99**: 127-129.
- 50. Ibáñez-Bernal, S., R. Hernández and F. Mendoza. 2006.** Collections of Bruchomyiinae and Phlebotominae (Diptera: Psychodidae) from the north-central portion of the state of Veracruz, Mexico, with the description of a new species. *Zootaxa*. **1270**: 19-33.
- 51. Ibáñez-Bernal, S., T. Suárez and F. Mendoza. 2011.** An updated checklist of the phlebotomine sand flies of Veracruz, Mexico (Diptera: Psychodidae, Phlebotominae). *Zootaxa*. **2928**: 29-40.
- 52. Lawyer, P., D. Young, J. Butler and D. Akin. 1987.** Development of *Leishmania mexicana* in *Lutzomyia diabolica* and *Lutzomyia shannoni* (Diptera: Psychodidae). *Journal of Medical Entomology*. **24**: 347-355.
- 53. Lewis, D. and P. Garnham. 1959.** The species of *Phlebotomus* (Diptera: Psychodidae) in British Honduras. *Proceedings of the Royal Society B*. **28**: 79-89.
- 54. Mann, R. and P. Kaufman. 2010a.** Colonization of *Lutzomyia shannoni* (Diptera: Psychodidae) utilizing an artificial blood feeding technique. *Journal of Vector Ecology*. **35**: 286-294.

- 55. Mann, R. and P. Kaufman. 2010b.** The seasonal abundance of phlebotomine sand flies, *Lutzomyia* species in Florida. *Journal of the American Mosquito Control Association*. **26**: 10-17.
- 56. Mangabeira, O. and P. Galindo. 1944.** The genus *flebotomus* in California. *American Journal of Hygiene*. **49**: 182-198.
- 57. Martins, A., P. Williams and A. Lima. 1978.** American Sand Flies (Diptera: Psychodidae, Phlebotominae). *Academia Brasileira de Ciencias*. Rio de Janeiro, Brasil. pp.197.
- 58. May, E., H. Hernandez and E. Rebollar-Téllez. 2011.** Distribución de flebotomíneos (Diptera: Psychodidae) en Quintana Roo, México. *Acta Zoológica Mexicana*. **27**: 273-289.
- 59. McHugh, C. 1991.** Distributional records for some North American Sand Flies, *Lutzomyia* (Diptera: Psychodidae). *Entomological News*. **102**: 192-194.
- 60. McHugh, C. 1999.** Notes on the sand flies (Diptera: Psychodidae) of Southern Arizona. *Entomological News*. **110**: 297-301.

- 61. McHugh, C., B. Ostrander, R. Raymond and S. Kerr. 2001.** Population dynamics of sand flies (Diptera: Psychodidae) at two foci of Leishmaniasis in Texas. *Journal of Medical Entomology*. **38**: 268-277.
- 62. McHugh, C., M. Grogl and R. Kreutzer. 1993.** Isolation of *Leishmania mexicana* (Kinetoplastida: Trypanosomatidae) from *Lutzomyia anthophora* (Diptera: Psychodidae) collected in Texas. *Journal of Medical Entomology*. **30**: 631-633.
- 63. Mead, D. and C. Cupp. 1995.** Occurrence of *Lutzomyia anthophora* (Diptera: Psychodidae) in Arizona. *Journal of Medical and Entomology*. **32**: 747-748.
- 64. Méndez, C. 2005.** Diversidad y Abundancia de flebótomos adultos (Diptera: Psychodidae) en tres localidades de la Península de Yucatán. Memoria de Residencia Profesional. Instituto Tecnológico Agropecuario No. 2. (ITA)-SEP-SEIT. Yucatán, México.
- 65. Mézquita, E. 2005.** Especies de flebótomos (Diptera: Psychodidae) en dos localidades de Calakmul, Campeche con transmisión de Leishmaniasis abarcando 2002-2004. Memoria de Residencia Profesional, Instituto Tecnológico Agropecuario No. 2. (ITA)-SEP-SEIT. Yucatán, México.
- 66. Mikery-Pacheco, O. 2011.** Detección de *Wolbachia* y *Leishmania* en poblaciones silvestres de *Lutzomyia spp.* (Diptera: Psychodidae) en la zona cafetalera de la Región Soconusco, Chiapas. Thesis. Licenciatura en Ingeniero Biotecnólogo. Universidad Autónoma de Chiapas. Tapachula, Chiapas.

- 67. Minter, L., B. Kovacic, D. Claborn, P. Lawyer, D. Florin and G. Brown. 2009.** New State records for *Lutzomyia shannoni* and *Lutzomyia vexator*. *Journal of Medical Entomology*. **46**: 965-968.
- 68. Minter, L., G. Brown and D. Johnson. 2011.** Investigation of habitat effects on the spatial distribution of *Lu. shannoni* across heterogeneous environments, with note of respective mosquito species composition. *Journal of Medical Entomology*. **48**: 1103-1111.
- 69. Montes de Oca-Aguilar, A. 2010.** Análisis prospectivo para la caracterización de sitios de desarrollo larval y de reposo de flebotomíneos adultos en la Península de Yucatán. Thesis. Licenciatura en Biología. Instituto Tecnológico de Conkal, Conkal, Yucatán.
- 70. Moo-Llanes, D. 2009.** Diversidad y distribución Geográfica de las especies de los géneros *Brumptomyia* (Franca & Parrot) y *Lutzomyia* (Franca) (Diptera: Psychodidae) en Quintana Roo, México. Thesis. Licenciatura en Biología. Universidad Autónoma de Yucatán. Yucatán, México.
- 71. Ortega, M. 1966.** Flebotomos de la Cuenca del Balsas (Diptera: Psychodidae). Thesis. Licenciatura en Biología. Universidad Autónoma de México. México, D.F.
- 72. Ostfeld, R., P. Roy, W. Haumaier, L. Canter, F. Keesing and E. Rowton. 2004.** Sand fly (*Lutzomyia vexator*) (Diptera: Psychodidae) populations in upstate New York: Abundance, Microhabitat and Phenology. *Journal of Medical Entomology*. **41**: 774-778.

**73. Pech-May, A., F. Escobedo, M. Berzunza and E. Rebollar. 2010.** Incrimination of four sandfly previously unrecognized as vectors of *Leishmania* parasites in Mexico. *Medical and Veterinary Entomology*. **24**: 150-161.

**74. Pech-May, A., C. Marina-Fernández, E. Vázquez-Domínguez, M. Berzunza-Cruz, E.A. Rebollar-Téllez, J.A. Narváez-Zapata, D. Moo-Llanes, S. Ibáñez-Bernal, J. Ramsey-Willoquet, and I. Becker-Fauser. 2013.** Genetic structure and genetic divergence in population of *Lutzomyia cruciata*, a phlebotomine sand fly (Diptera: Psychodidae) vector of *Leishmania mexicana* in southeastern Mexico. *Infection, Genetics and Evolution*. 16: 254-262.

**75. Peraza, G. 2009.** Especies de flebotomíneos (Diptera: Psychodidae) de importancia médica y su potencial como vectores de *Leishmania mexicana* (Kinetoplastida: Trypanosomatidae) en Calakmul, Campeche. Thesis. Licenciatura en Biología. Universidad Autónoma de Yucatán, México.

**76. Price, D., D. Gunther and R. Gaugler. 2011.** First collection records of Phlebotomine sand flies (Diptera: Psychodidae) from New Jersey. *Journal of Medical Entomology*. **48**: 476-478.

**77. Porter, C., F. Steurer and R. Kreutzer. 1987.** Isolation of *Leishmania mexicana mexicana* from *Lutzomyia ylephiletor* in Guatemala. *Transactions of the Royal Society of Tropical Medicine and Hygiene*. **81**: 929-930.

**78. Rebollar-Téllez, E. Personal collections records.**

- 79. Rebollar-Téllez, E., A. Ramírez and F. Andrade. 1996a.** A two years study on vectors of cutaneous leishmaniasis. Evidence for sylvatic transmission cycle in the state of Campeche, Mexico. *Memorias do Instituto Oswaldo Cruz*. 91: 555-560.
- 80. Rebollar-Téllez, E., E. Tun, P. Manrique-Saide and F. Andrade. 2005.** Relative abundance of sandfly species (Diptera: Phlebotomidae) in two villages in same area of Campeche in Southern Mexico. *Annals of Tropical Medicine and Parasitology*. 99: 193-201.
- 81. Rebollar-Téllez, E., F. Reyes, I. Fernández and F. Andrade. 1996b.** Population dynamics and biting rhythm of the anthropophilic sandfly *Lutzomyia cruciata* (Diptera: Psychodidae) in Southeast, Mexico. *Revista do Instituto de Medicina Tropical de São Paulo* 38: 29-33.
- 82. Rebollar-Téllez, E., F. Reyes, I. Fernández and F. Andrade. 1996c.** Abundance and parity rate of *Lutzomyia cruciata* (Diptera: Psychodidae) in an endemic focus of Localized Cutaneous Leishmaniasis in Southern Mexico. *Journal of Medical Entomology* . 33: 683-685.
- 83. Rebollar- Téllez, E., P. Manrique-Saide, E. Tun, A. Che and F. Dzul. 2004.** Further records of phlebotomid sandflies (Diptera: Psychodidae) from Campeche, Mexico. *Entomological News*. 115: 283-291.
- 84. Rebollar, E.A., H. Orilla, F. Dzul, A. Che, P. Manrique and A. Zapata. 2006.** An update on the phlebotomid sand fly (Diptera: Phlebotomidae) fauna of Yucatan, Mexico. *Entomological News*. 117: 21-23.

- 85. Rowton, E., M. de Mata, N. Rizzo, C. Porter and T. Navin. 1992.** Isolation of *Leishmania braziliensis* from *Lutzomyia ovallesi* (Diptera: Psychodidae) in Guatemala. *American Journal of Tropical Medicine and Hygiene*. **46**: 465-468.
- 86. Rowton, E., M. de Mata, N. Rizzo, T. Navin and Porter, C. 1991.** Vectors of *Leishmania braziliensis* in the Peten, Guatemala. *Parassitologia* **33**: (Supplement 1) 501-504.
- 87. Rosabal, R. and A. Miller. 1970.** Phlebotomine sand flies in Louisiana (Diptera: Psychodidae). *Mosquito News*. **30**: 180-187.
- 88. Rozeboom, L. and C. Courson. 1944.** *Phlebotomus limai* Fonseca in the United States (Diptera: Psychodidae). *The Journal of Parasitology*. **30**: 274-275.
- 89. Sánchez, L., C. Pozo and E. Rebollar-Téllez. 2007.** “Colección de referencia de vectores de *Leishmania* spp. (causante de la Leishmaniasis cutánea localizada) de la Península de Yucatán y un estudio preliminar en un área endémica de Quintana Roo”. Informe Final de Actividades para la Comisión Nacional para el Conocimiento y Uso de la Biodiversidad (CONABIO).
- 90. Sánchez, L., M. Berzunza, I. Becker and E. Rebollar-Téllez. 2010.** Sand flies naturally infected by *Leishmania (L.) mexicana* in the peri-urban area of Chetumal city, Quintana Roo, México. *Transactions of the Royal Society of Tropical Medicine and Hygiene*. **104**: 406-411.

- 91. Schemanchuk, J., R. Robertson and K. Depner. 1978.** Occurrence of two species of *Phlebotomus* sandflies (Diptera: Psychodidae) in burrows of yellow-bellied marmot, *Marmota flaviventris* Nosophora, in Southern Alberta. *The Canadian Entomologist*. **110**: 1355-1358.
- 92. Snow, W.E. 1955.** Feeding activities of some blood-sucking Diptera with reference to vertical distribution in bottomland forest. *Annals Entomological Society of America*. **48**: 512-521.
- 93. Treviño, N. 2001.** Dinámica de infección de Leishmaniasis y fluctuación poblacional de *Lutzomyia* spp. (Diptera: Psychodidae) en cafetales de Nayarit, México. Thesis de Maestría. Universidad Autónoma de Nuevo León.
- 94. Vargas, L. and A. Díaz-Nájera. 1951.** *Phlebotomus betrani* n. sp. y *Phlebotomus wirthi* n. sp. del estado de Veracruz (Diptera: Psychodidae). *Revista del Instituto de Salubridad y Enfermedades Tropicales*. **12**: 101-106.
- 95. Vargas, L. and A. Díaz-Nájera. 1952.** Dos flebotomos nuevos de Mexico (Diptera: Psychodidae). *Revista de la Sociedad Mexicana de Historia Natural*. **13**: 63-74.
- 96. Vargas, L. and A. Díaz-Nájera. 1953a.** Lista de flebotomos mexicanos y su distribución geográfica (Diptera: Psychodidae). *Revista del Instituto de Salubridad y Enfermedades Tropicales*. **13**: 309-314.

- 97. Vargas, L. and A. Díaz-Nájera. 1953b.** Nuevas especies de flebotomos de México (Diptera: Psychodidae). *Revista del Instituto de Salubridad y Enfermedades Tropicales*. **13**: 41-52.
- 98. Vargas, L. and A. Díaz-Nájera 1959.** *Phlebotomus farilli* n. sp., *Ph. humboldti* n. sp., y *Ph. olmecus* n. sp. de Mexico (Diptera: Psychodidae). *Revista del Instituto de Salubridad y Enfermedades Tropicales*. **19**: 141-143.
- 99. Williams, P. 1970a.** Phlebotomine sandflies and Leishmaniasis in British Honduras (Belize). *Royal Society of Tropical Medicine and Hygiene*. **64**: 317-363.
- 100. Williams, P. 1970b.** On the vertical distribution of Phlebotomine sandflies (Diptera: Psychodidae) in British Honduras (Belize). *Bulletin of Entomological Research*. **59**: 637-646.
- 101. Williams, P. 1976.** The phlebotomine sandflies (Diptera: Psychodidae) of caves in Belize, Central America. *Bulletin of Entomological Research*. **65**: 601-614.
- 102. Williams, P. 1976.** The form of *Lutzomyia beltrani* (vagas & Díaz-Nájera) (Diptera, Psychodidae) in Belize, Central America. *Bulletin of Entomological Research*. **65**: 595-599.

**103. Williams, P., D. Lewis and P. Garnham. 1965.** On Dermal Leishmaniasis in British Honduras. *Transactions of the Royal Society of Tropical Medicine and Hygiene.* **59:** 64-71.

**104. Young, D. 1972.** Phlebotomine sand flies from Texas and Florida (Diptera: Psychodidae). *The Florida Entomologist.* **55:** 61-64.

**105. Young, D. G. and P.V. Perkins. 1984.** Phlebotomine sand flies of North America (Diptera: Psychodidae). *Mosquito News.* **44:** 263-304.
