# Supplementary material for: Current and Future Niche of North and Central American Sand Flies (Diptera: Psychodidae) in Climate Change Scenarios
Source: PLoS Negl Trop Dis. 2013 Sep 19;7(9):e2421. doi: 10.1371/journal.pntd.0002421 (PMC3777871; doi:10.1371/journal.pntd.0002421)
Supplement: Table S2 — Test accuracy, AUC (ROC curve) and statistical significance. (PDF) [file pntd.0002421.s028.pdf]

**Table S2. Test accuracy, AUC (ROC curve) and statistical significance.**

| Species                   | INTERNAL TEST |      |                       | EXTERNAL TEST |      |                       |
|---------------------------|---------------|------|-----------------------|---------------|------|-----------------------|
|                           | Accuracy      | AUC  | P                     | Accuracy      | AUC  | P                     |
| <i>Brumptomyia hamata</i> | 1.00          | 0.98 | 1.10 <sup>E-63</sup>  | 1.00          | 0.98 | 7.85 <sup>E-56</sup>  |
| <i>Br. mesai</i>          | 1.00          | 0.98 | 0.00                  | 1.00          | 0.98 | 7.55 <sup>E-136</sup> |
| <i>Lutzomyia beltrani</i> | 1.00          | 0.98 | 1.61 <sup>E-88</sup>  | 1.00          | 0.98 | 6.19 <sup>E-38</sup>  |
| <i>Lu. bispinosa</i>      | 1.00          | 0.99 | 2.35 <sup>E-63</sup>  | 1.00          | 0.99 | 2.99 <sup>E-22</sup>  |
| <i>Lu. carpenteri</i>     | 1.00          | 0.98 | 6.86 <sup>E-271</sup> | 1.00          | 0.98 | 8.53 <sup>E-100</sup> |
| <i>Lu. cayennensis</i>    | 1.00          | 0.98 | 1.52 <sup>E-306</sup> | 0.93          | 0.98 | 3.71 <sup>E-85</sup>  |
| <i>Lu. chiapanensis</i>   | 1.00          | 0.97 | 3.39 <sup>E-76</sup>  | 0.75          | 0.96 | 4.06 <sup>E-18</sup>  |
| <i>Lu. cratifer</i>       | 1.00          | 0.98 | 4.09 <sup>E-174</sup> | 1.00          | 0.98 | 6.75 <sup>E-69</sup>  |
| <i>Lu. cruciata</i>       | 1.00          | 0.97 | 0.00                  | 0.97          | 0.96 | 1.49 <sup>E-183</sup> |
| <i>Lu. deleoni</i>        | 0.99          | 0.98 | 0.00                  | 1.00          | 0.98 | 2.04 <sup>E-217</sup> |
| <i>Lu. dodgei</i>         | 1.00          | 0.98 | 2.57 <sup>E-55</sup>  | 1.00          | 0.98 | 8.51 <sup>E-22</sup>  |
| <i>Lu. longipalpis</i>    | 1.00          | 0.97 | 1.86 <sup>E-190</sup> | 1.00          | 0.97 | 9.61 <sup>E-67</sup>  |
| <i>Lu. olmeca olmeca</i>  | 0.99          | 0.98 | 0.00                  | 0.96          | 0.98 | 1.70 <sup>E-261</sup> |
| <i>Lu. ovallesi</i>       | 1.00          | 0.98 | 0.00                  | 1.00          | 0.98 | 2.47 <sup>E-112</sup> |
| <i>Lu. panamensis</i>     | 0.98          | 0.98 | 0.00                  | 1.00          | 0.98 | 2.17 <sup>E-138</sup> |
| <i>Lu. permira</i>        | 1.00          | 0.98 | 7.82 <sup>E-141</sup> | 1.00          | 0.98 | 6.37 <sup>E-51</sup>  |
| <i>Lu. serrana</i>        | 1.00          | 0.80 | 5.28 <sup>E-93</sup>  | 0.80          | 0.97 | 9.82 <sup>E-26</sup>  |
| <i>Lu. shannoni</i>       | 0.97          | 0.92 | 3.60 <sup>E-257</sup> | 0.91          | 0.90 | 1.11 <sup>E-73</sup>  |
| <i>Lu. steatopyga</i>     | 1.00          | 0.98 | 0.00                  | 1.00          | 0.98 | 1.88 <sup>E-177</sup> |
| <i>Lu. trinidadensis</i>  | 1.00          | 0.98 | 7.87 <sup>E-298</sup> | 1.00          | 0.98 | 1.23 <sup>E-100</sup> |
| <i>Lu. undulata</i>       | 1.00          | 0.98 | 2.98 <sup>E-224</sup> | 1.00          | 0.98 | 2.29 <sup>E-81</sup>  |
| <i>Lu. ylephiletor</i>    | 1.00          | 0.98 | 1.69 <sup>E-77</sup>  | 1.00          | 0.98 | 2.52 <sup>E-33</sup>  |
| <i>Lu. anthophora</i>     | 0.95          | 0.97 | 5.69 <sup>E-29</sup>  | 0.57          | 0.80 | 2.11 <sup>E-04</sup>  |
| <i>Lu. californica</i>    | 0.92          | 0.92 | 5.03 <sup>E-16</sup>  | 1.00          | 0.92 | 7.04 <sup>E-09</sup>  |
| <i>Lu. diabolica</i>      | 1.00          | 0.93 | 2.59 <sup>E-53</sup>  | 0.91          | 0.89 | 1.79 <sup>E-15</sup>  |
| <i>Lu. stewarti</i>       | 1.00          | 0.94 | 9.45 <sup>E-22</sup>  | 1.00          | 0.95 | 7.53 <sup>E-09</sup>  |
| <i>Lu. texana</i>         | 0.95          | 0.94 | 5.35 <sup>E-48</sup>  | 1.00          | 0.95 | 7.75 <sup>E-19</sup>  |
| <i>Lu. vexator</i>        | 0.83          | 0.85 | 1.68 <sup>E-12</sup>  | 1.00          | 0.90 | 6.86 <sup>E-08</sup>  |
